# Supplementary material for: Design, Synthesis and Evaluation of Praziquantel Analogues and New Molecular Hybrids as Potential Antimalarial and Anti-Schistosomal Agents
Source: MDPI journal article supplement (doi:10.3390/molecules28135184), 2023-07-03
Supplement: s1 [file s1]

## Supplementary Information

**Antiplasmodial evaluation:** *In-vitro anti-plasmodium assay.* Compounds were tested using parasite lactate dehydrogenase assay as a marker for parasite survival. The respective stock solutions of CQ diphosphate and test compounds were prepared by dissolving 2 mg/mL in distilled water (for CQ) and 100% DMSO for test compounds. The solutions were then stored at  $-20^{\circ}\text{C}$ , with further dilutions prepared on the day of the experiment. The cultures were synchronized in the ring stage using 15 mL of 5% (w/v) d-sorbitol in water. Synchronous cultures of Pf NF54 (CQS) in the late trophozoite stage were prepared to 2% parasitemia and 2% hematocrit. Compounds were tested at starting concentrations of 10 000 ng/mL (1000 ng/mL for CQ), which were then serially diluted two-fold in complete medium to give 10 concentrations with a final volume of 200  $\mu\text{L}$  in each well. Parasites were incubated in the presence of the compounds at  $37^{\circ}\text{C}$  in a specialized atmosphere of 4%  $\text{CO}_2$  and 3%  $\text{O}_2$  in nitrogen for 48 h. Following incubation, 100  $\mu\text{L}$  of MalStat reagent and 15  $\mu\text{L}$  of resuspended culture were combined, followed by addition of 25  $\mu\text{L}$  of nitro blue tetrazolium chloride (NBT). The plates were kept in the dark for about 10 min to fully develop, and absorbance was measured at 620 nm on a microplate reader. Raw data were exported to Microsoft Excel for dose-response analysis [1, 2]. The as synthesized molecular hybrids and analogues were evaluated for in-vivo antiplasmodium activity against the chloroquine-sensitive strain (NF54) of *P. falciparum*, the  $\text{IC}_{50}$  recorded are displayed in the Table S1.

**Table S1.** In vitro antiplasmodial activity evaluation of molecular hybrids and praziquantel analogues.

| Compounds | Antiplasmodial activity $\text{IC}_{50}$ $\mu\text{M}$ | SEM |
|-----------|--------------------------------------------------------|-----|
| 2         | >6                                                     | ND  |
| 3         | >6                                                     | ND  |
| 4         | >6                                                     | ND  |

|           |    |    |
|-----------|----|----|
| <b>5</b>  | >6 | ND |
| <b>6</b>  | >6 | ND |
| <b>7</b>  | >6 | ND |
| <b>8</b>  | >6 | ND |
| <b>9</b>  | >6 | ND |
| <b>10</b> | >6 | ND |
| <b>11</b> | >6 | ND |
| <b>12</b> | >6 | ND |
| <b>13</b> | >6 | ND |
| <b>14</b> | >6 | ND |
| <b>15</b> | >6 | ND |

|                    |       |       |
|--------------------|-------|-------|
| <b>16</b>          | >6    | ND    |
| <b>17</b>          | >6    | ND    |
| <b>18</b>          | >6    | ND    |
| <b>19</b>          | >6    | ND    |
| <b>20</b>          | >6    | ND    |
| <b>Artesunate</b>  | >6    | ND    |
| <b>Chloroquine</b> | 0.009 | 0.002 |

The concentrations were presented in  $\mu\text{M/L}$ ; ND: Not determined, SEM: Standard error on the Mean.

## References.

1. Mueller, R., et al., *Lerisetron Analogues with Antimalarial Properties: Synthesis, Structure–Activity Relationship Studies, and Biological Assessment*. ACS Omega, 2020. **5**(12): p. 6967-6982. <https://doi.org/10.1021/acsomega.0c00327>
2. Makler, M.T., et al., *Parasite Lactate Dehydrogenase as an Assay for Plasmodium falciparum Drug Sensitivity*. The American Journal of Tropical Medicine and Hygiene, 1993. **48**(6): p. 739-741. <https://doi.org/10.4269/ajtmh.1993.48.739>

2-Nitro-1-phenylpropene  
STANDARD 1H OBSERVED profile

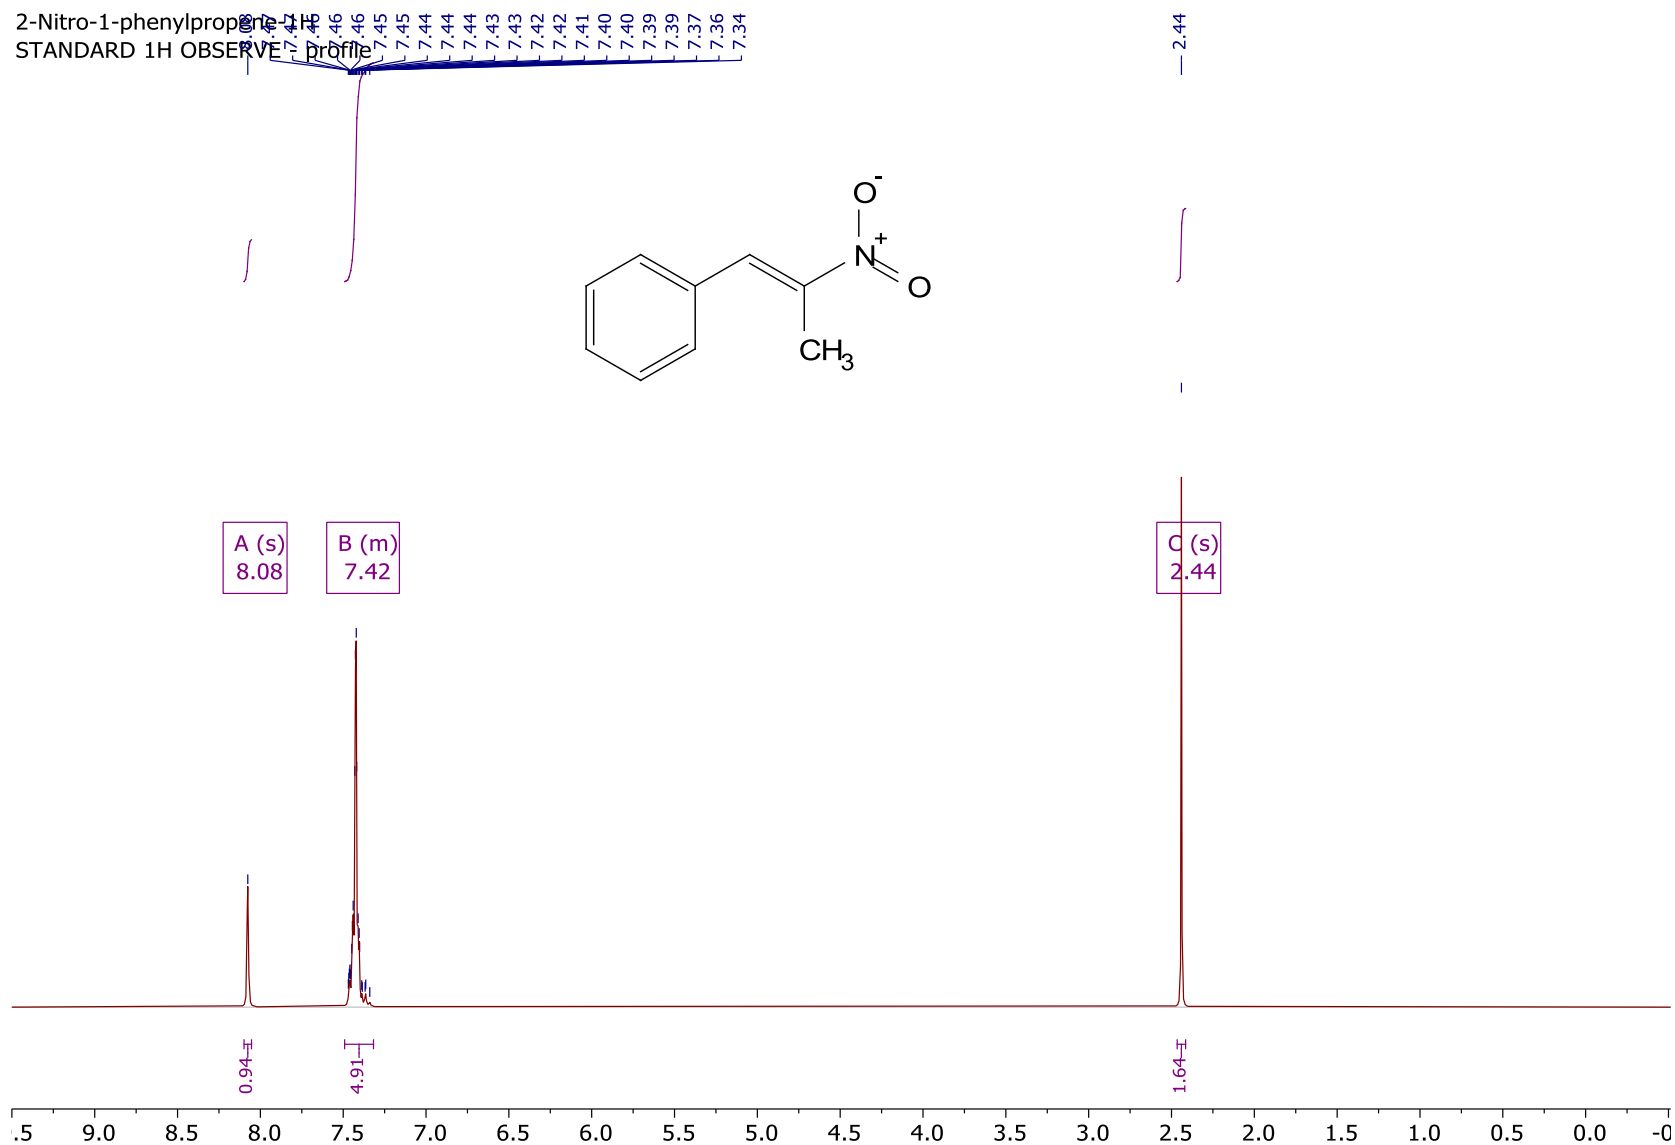

<sup>1</sup>H-NMR spectrum of trans-2-nitro-1-phenylpropene **165a**

2-Nitro-1-phenylpropene  
STANDARD CARBON PARAMETERS

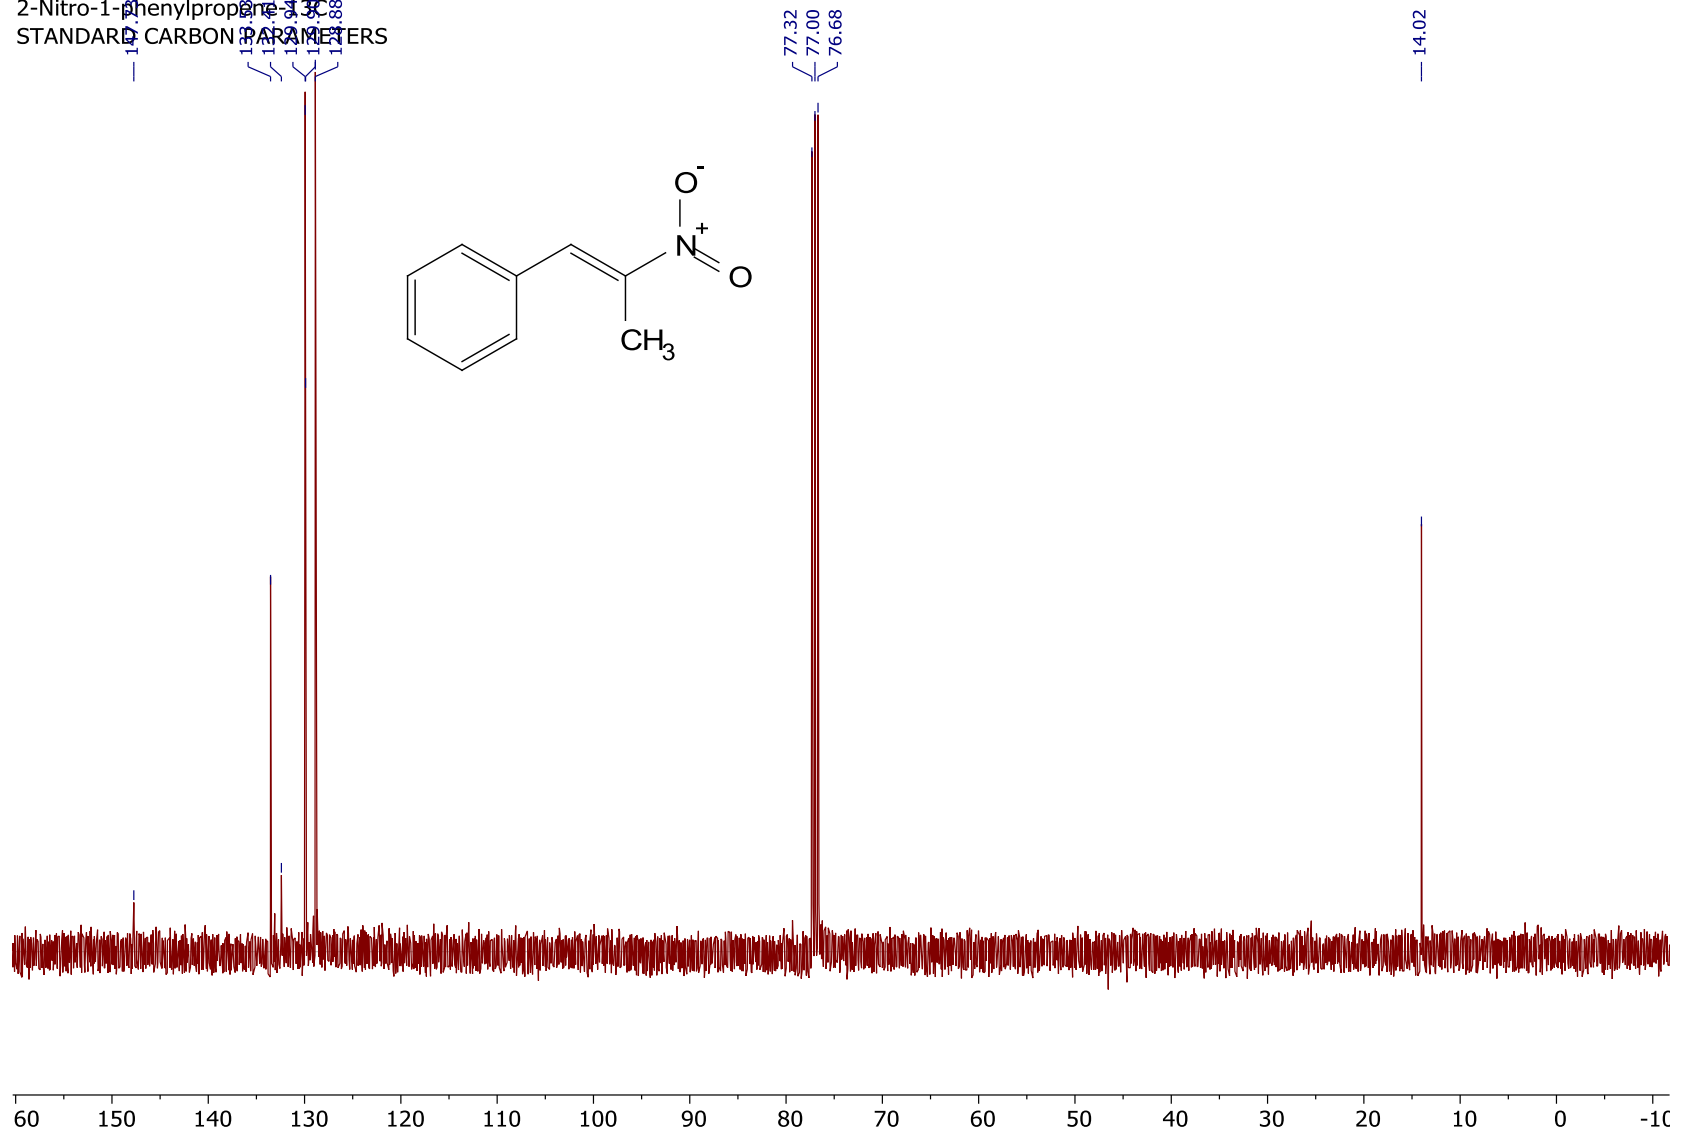

$^{13}\text{C}$ -NMR spectrum of trans-2-nitro-1-phenylpropene **165a**

Amphetamine-1H

STANDARD PROTON PARAMETERS

7.22  
7.20  
7.16  
7.16  
7.15  
7.14  
7.12  
7.12  
7.10

3.14  
3.13  
3.11  
3.11  
3.10  
3.09  
3.08  
3.06  
2.66  
2.65  
2.63  
2.61  
2.50  
2.48  
2.47  
2.45

1.06  
1.05

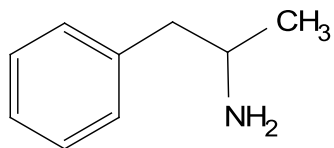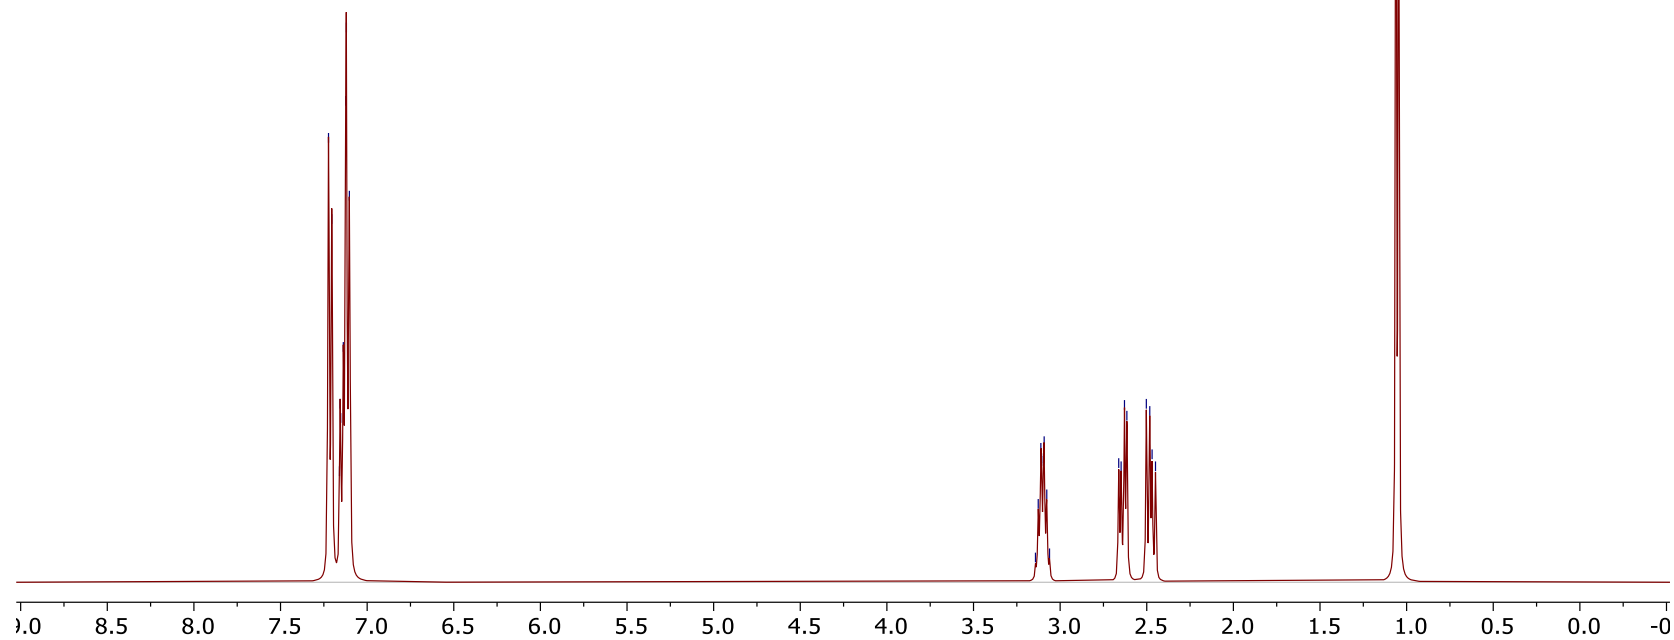<sup>1</sup>H-NMR spectrum of amphetamine **176a**

Amphetamine- $^{13}\text{C}$   
STANDARD CARBON PARAMETERS

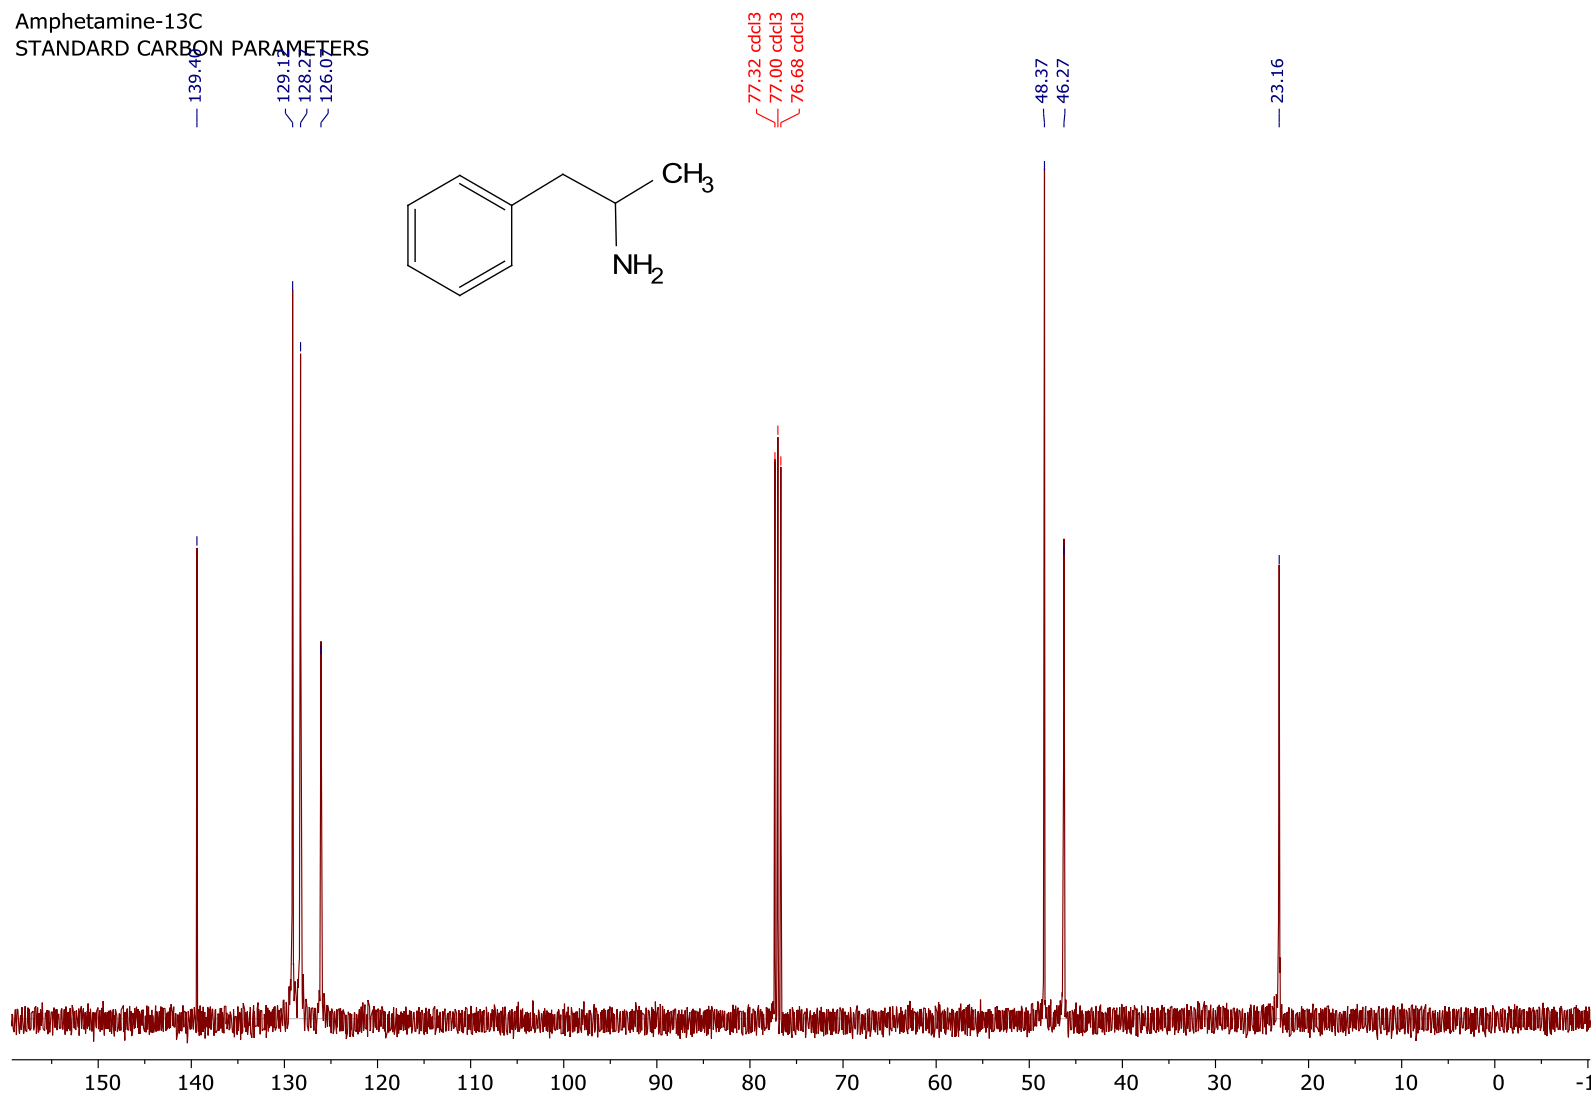

$^{13}\text{C}$ -NMR spectrum of amphetamine **17b**

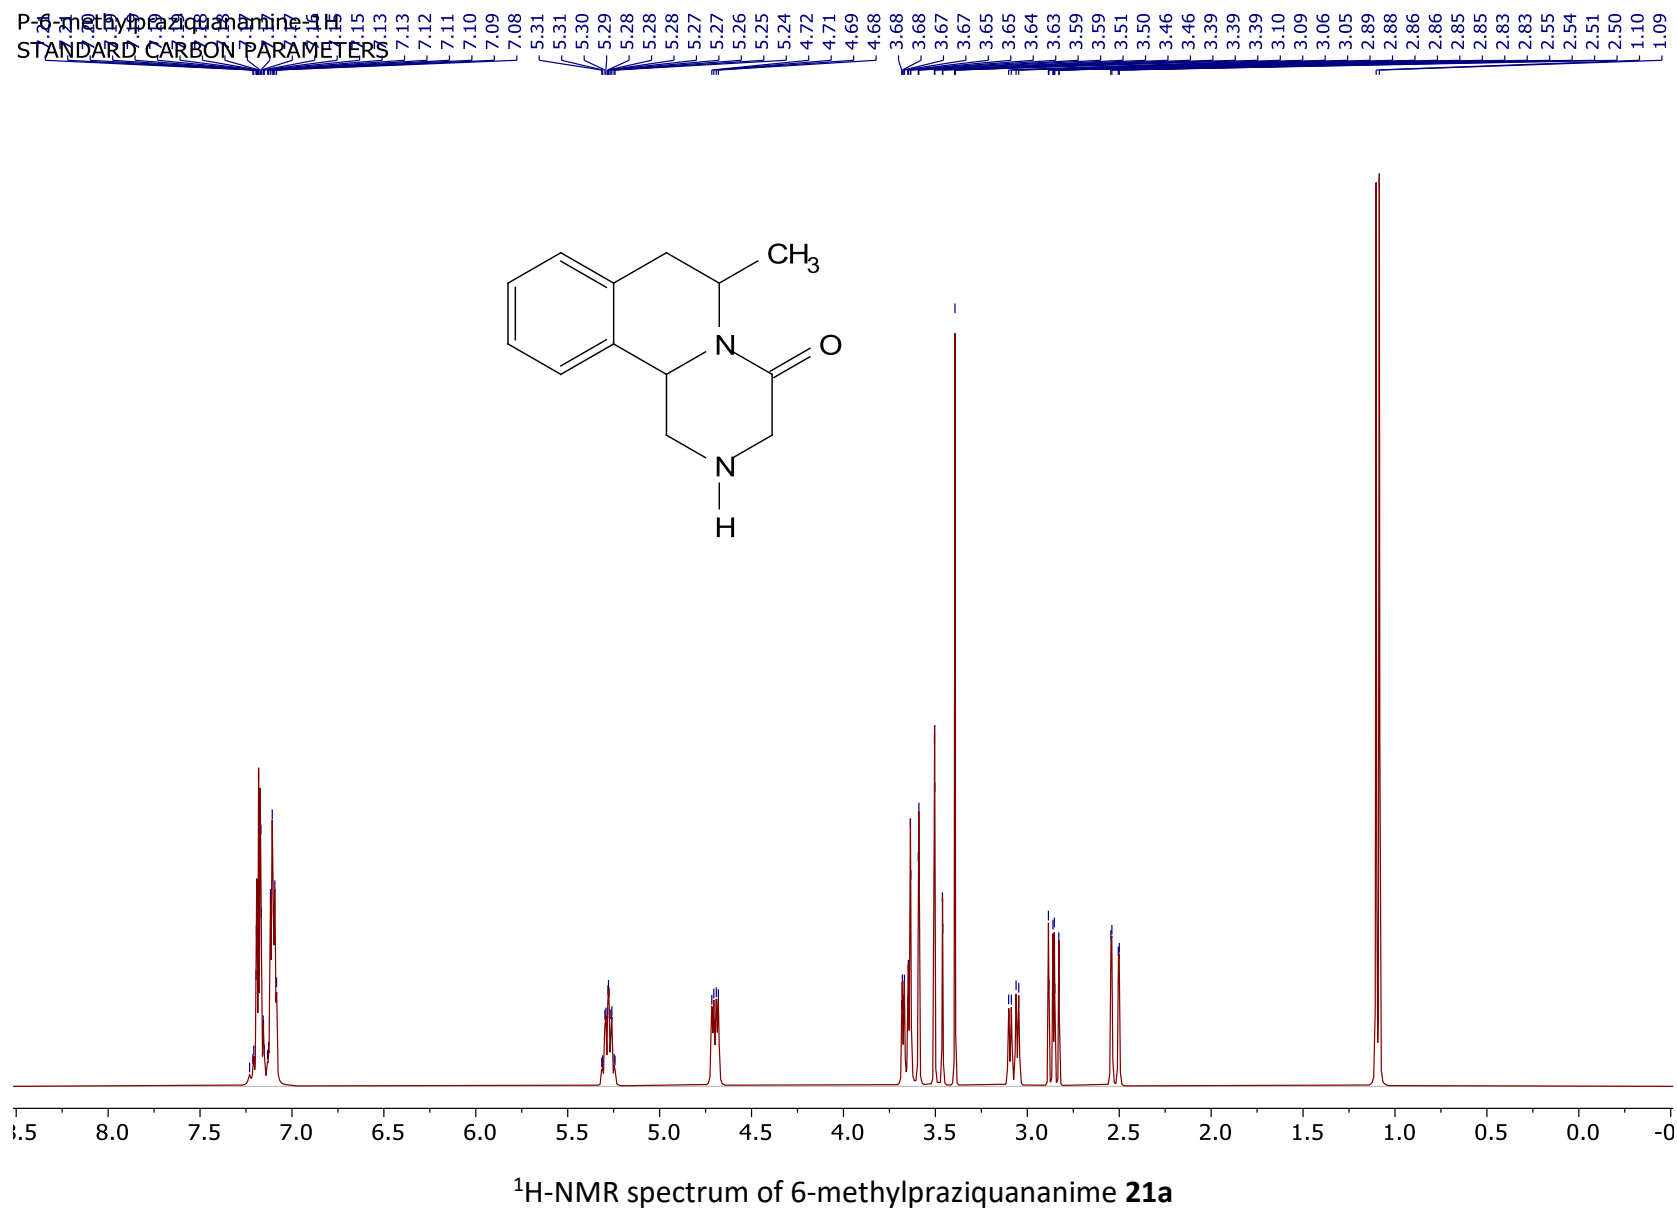



P-6-methylpraziquanamine-13c  
STANDARD CARBON PARAMETERS

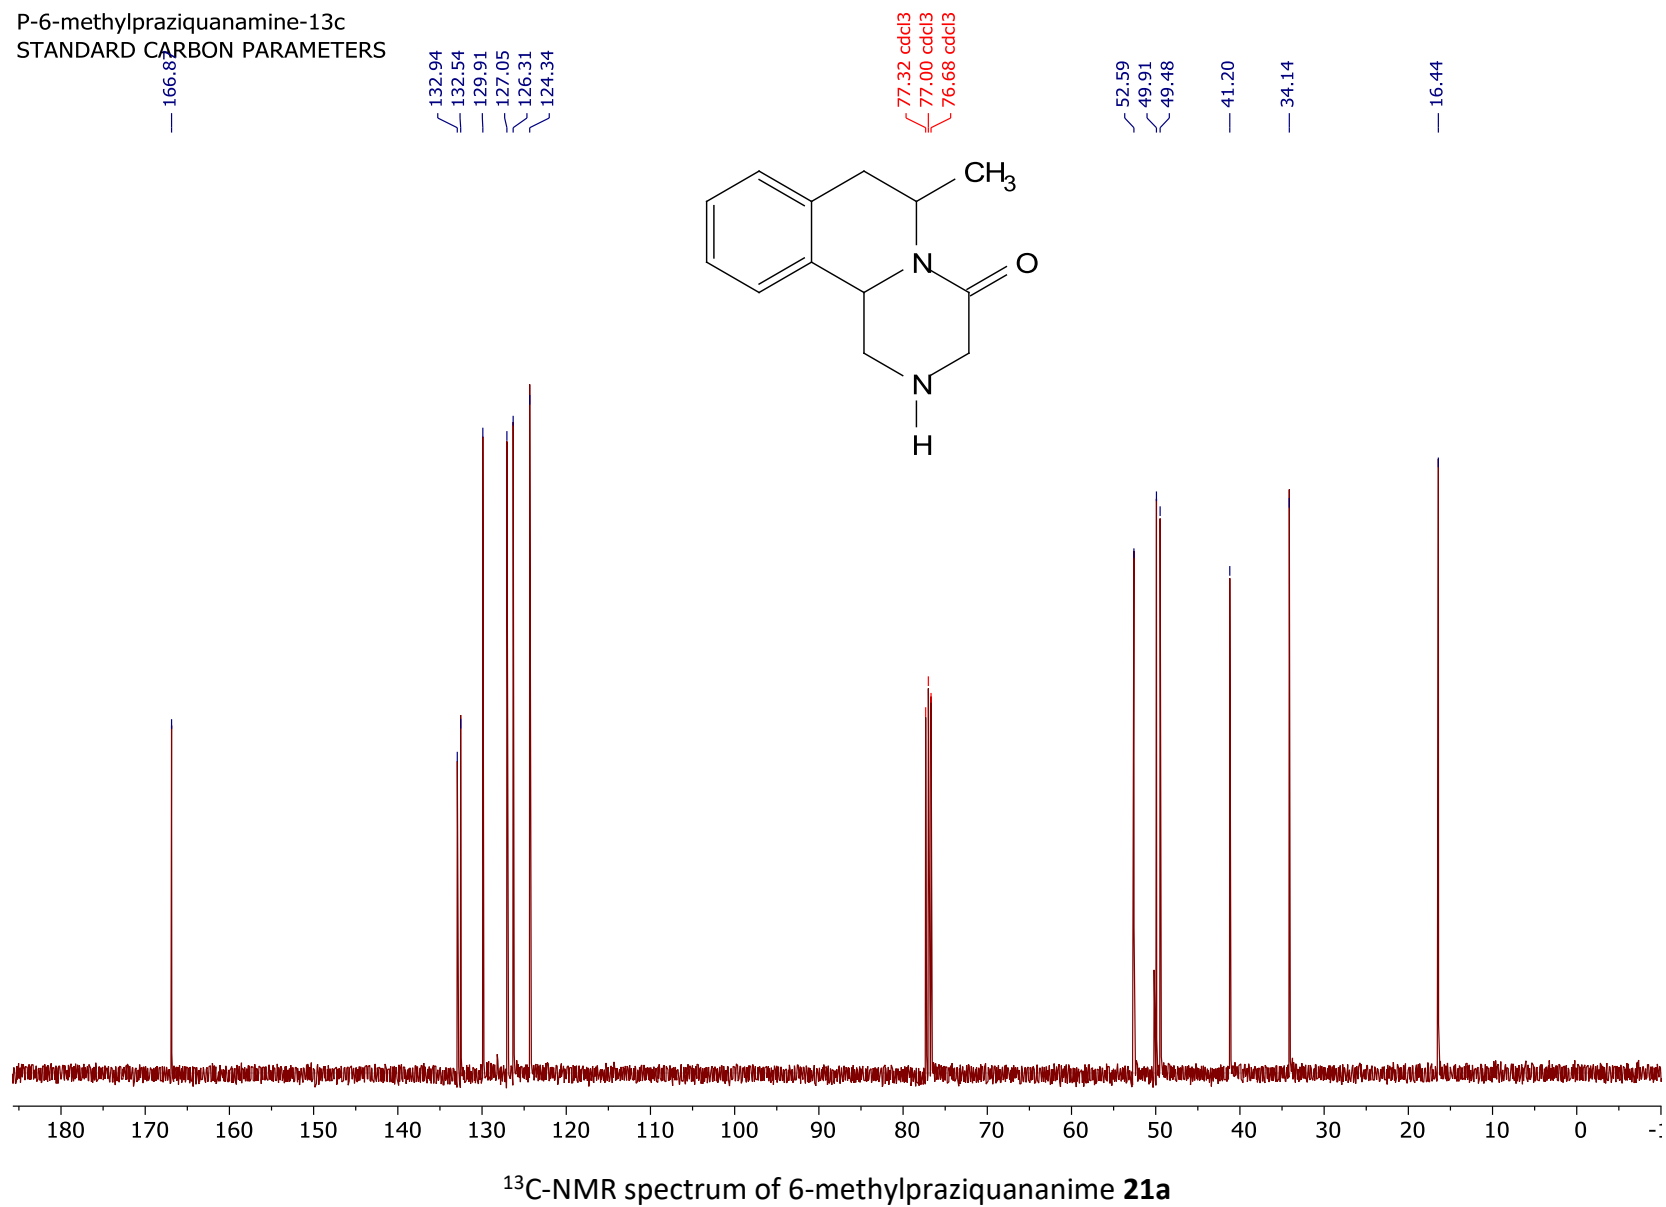

STANDARD CARBON PARAMETERS

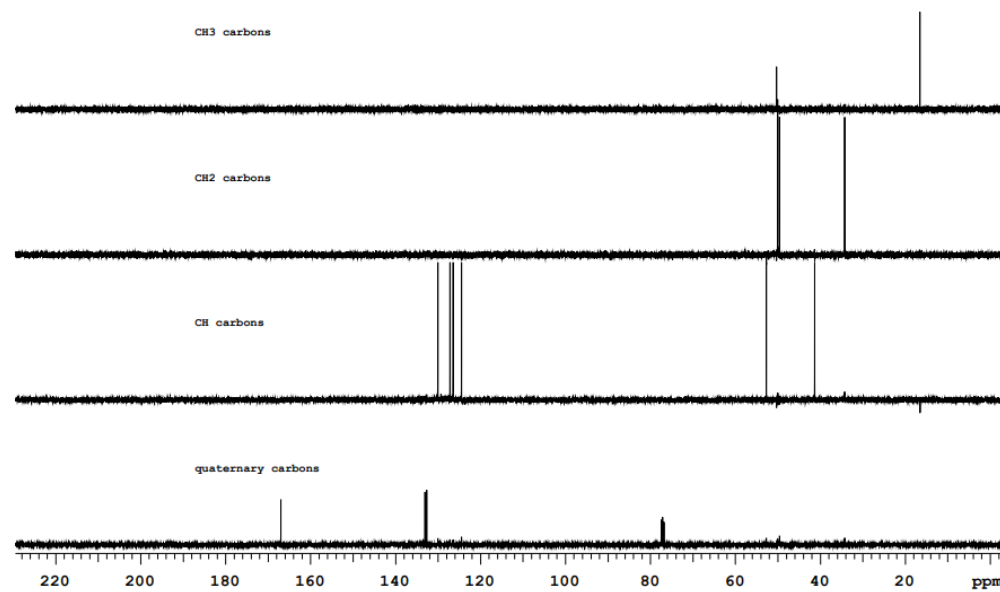DEPT spectrum of 6-methylpraziquanamine **21a**

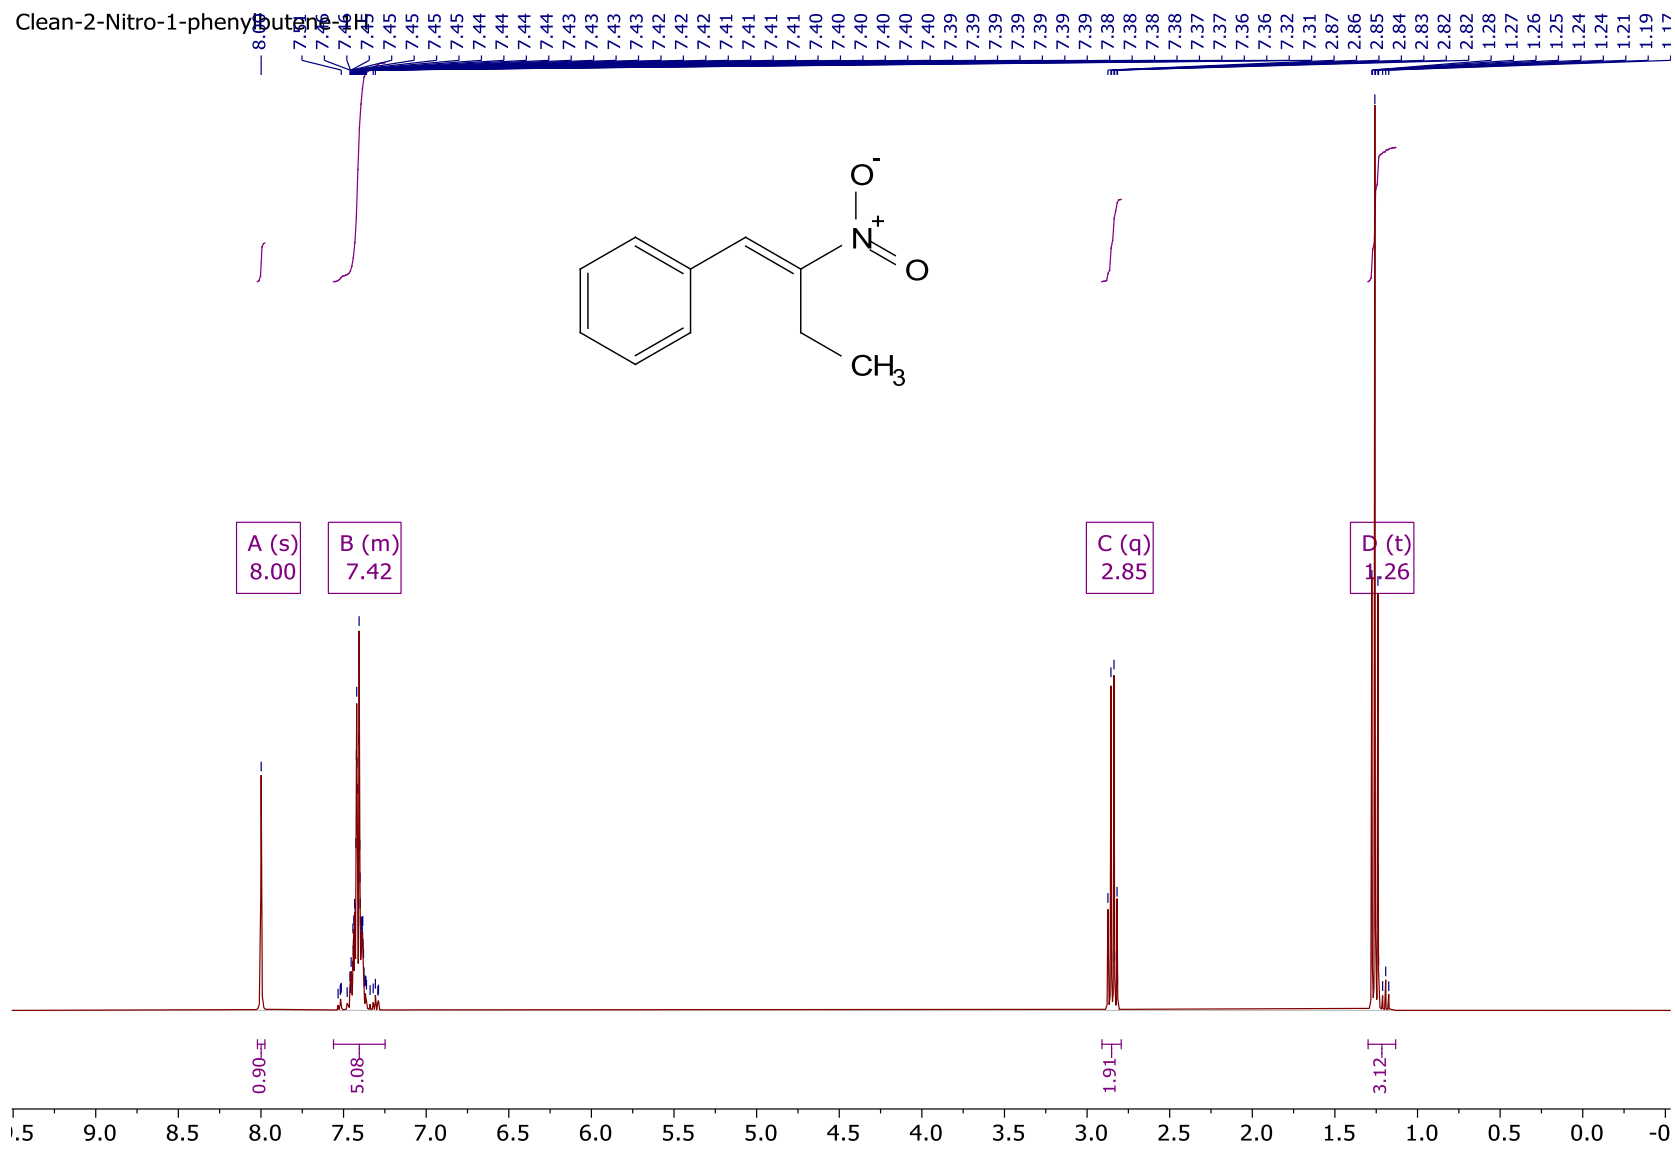

<sup>1</sup>H-NMR spectrum of trans-2-nitro-1-phenylbutene **16b**

Clean-2-Nitro-1-phenylbutene  
STANDARD PROTON PARAMETERS

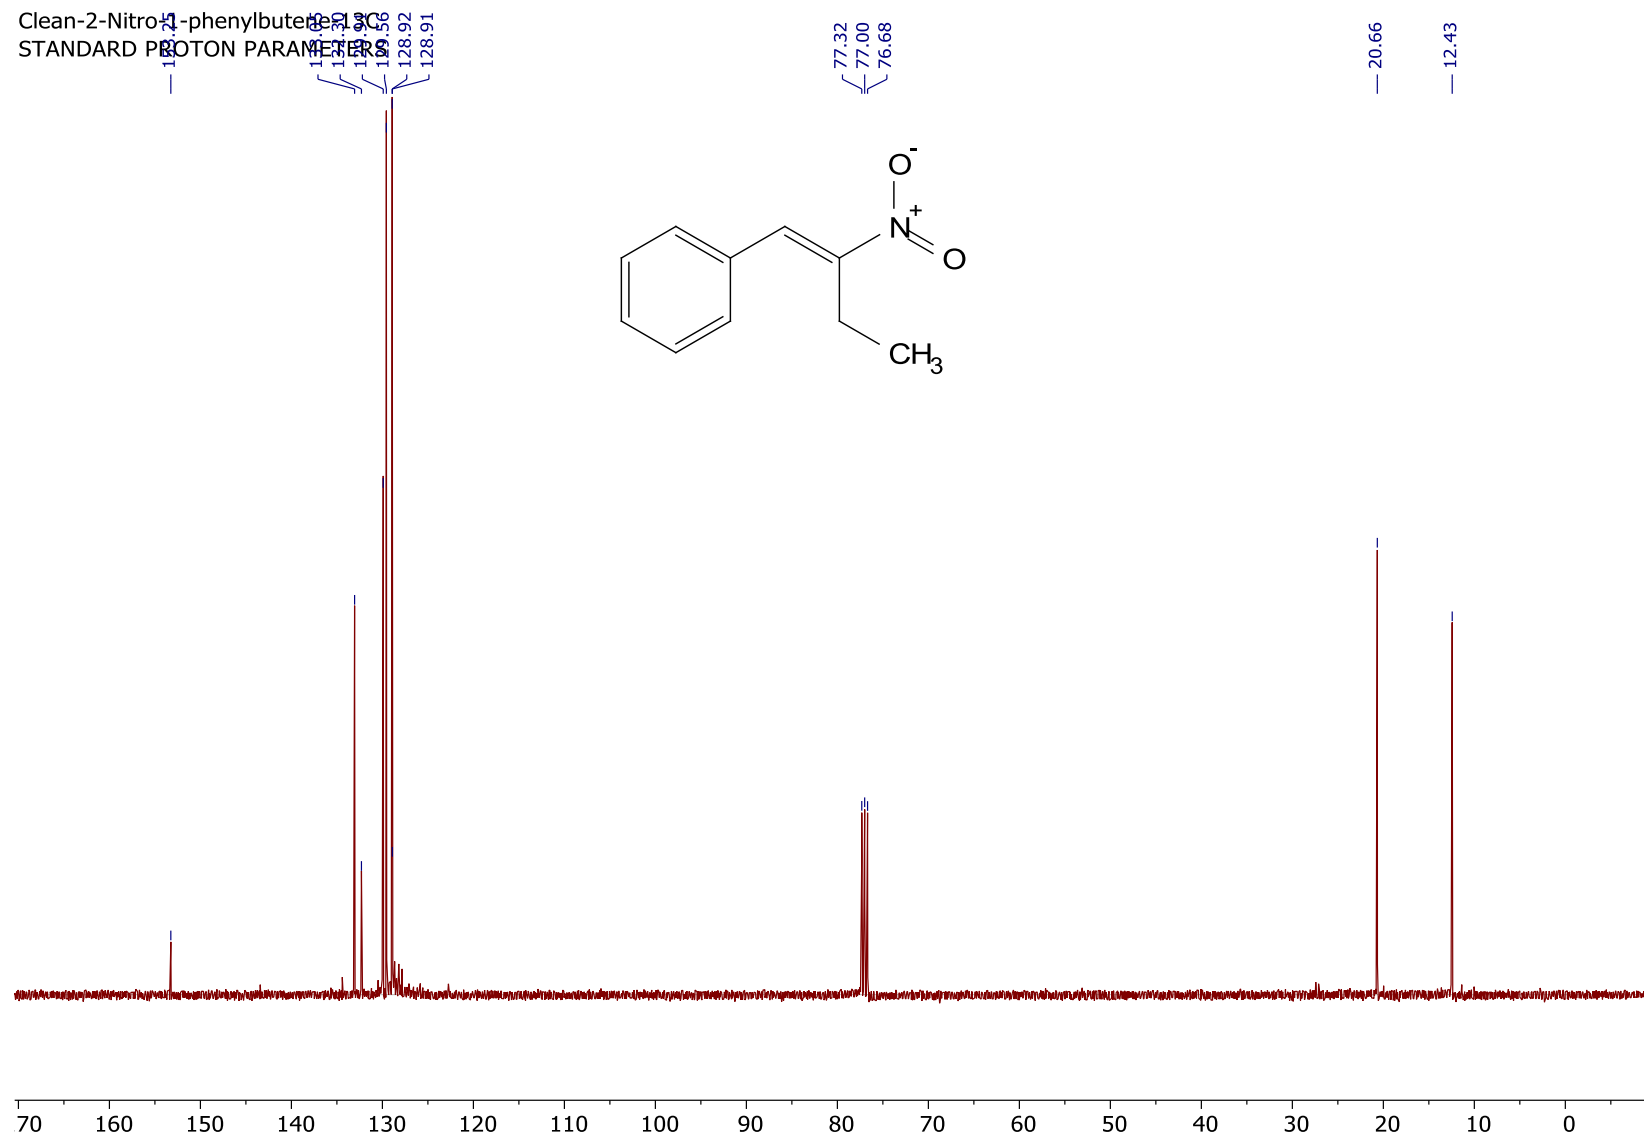

$^{13}\text{C}$ -NMR spectrum of trans-2-nitro-1-phenylbutene **16b**

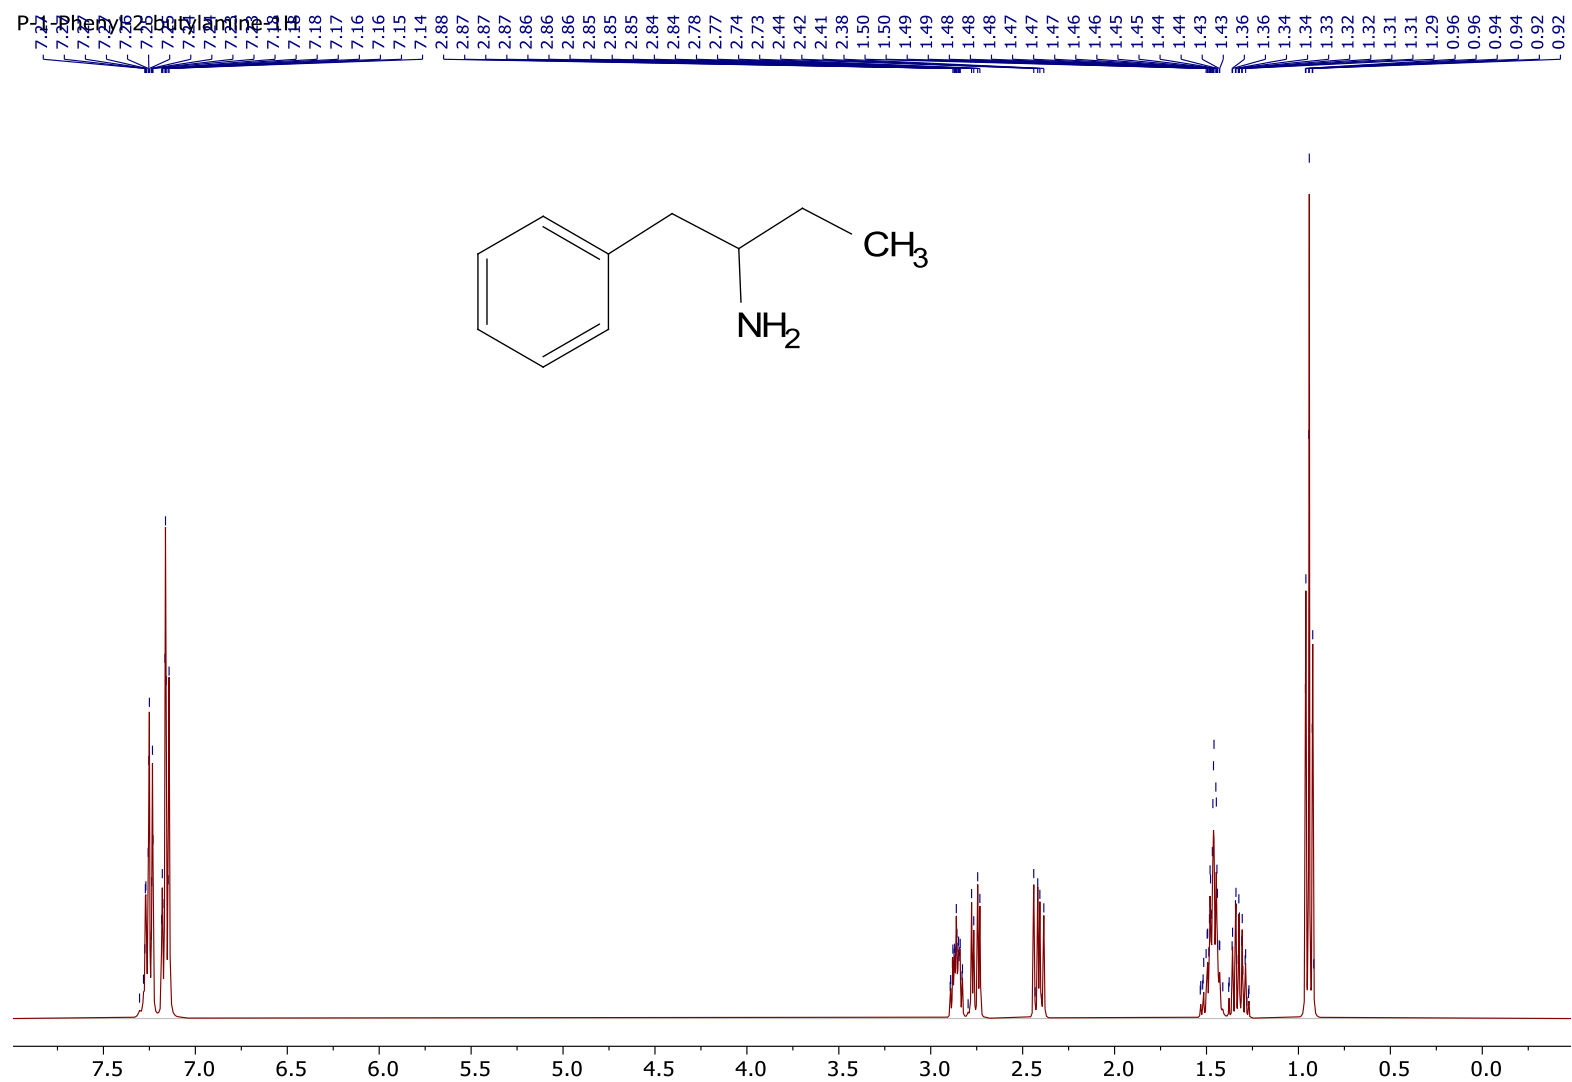

P-1-Phenyl-2-butylamine-13C

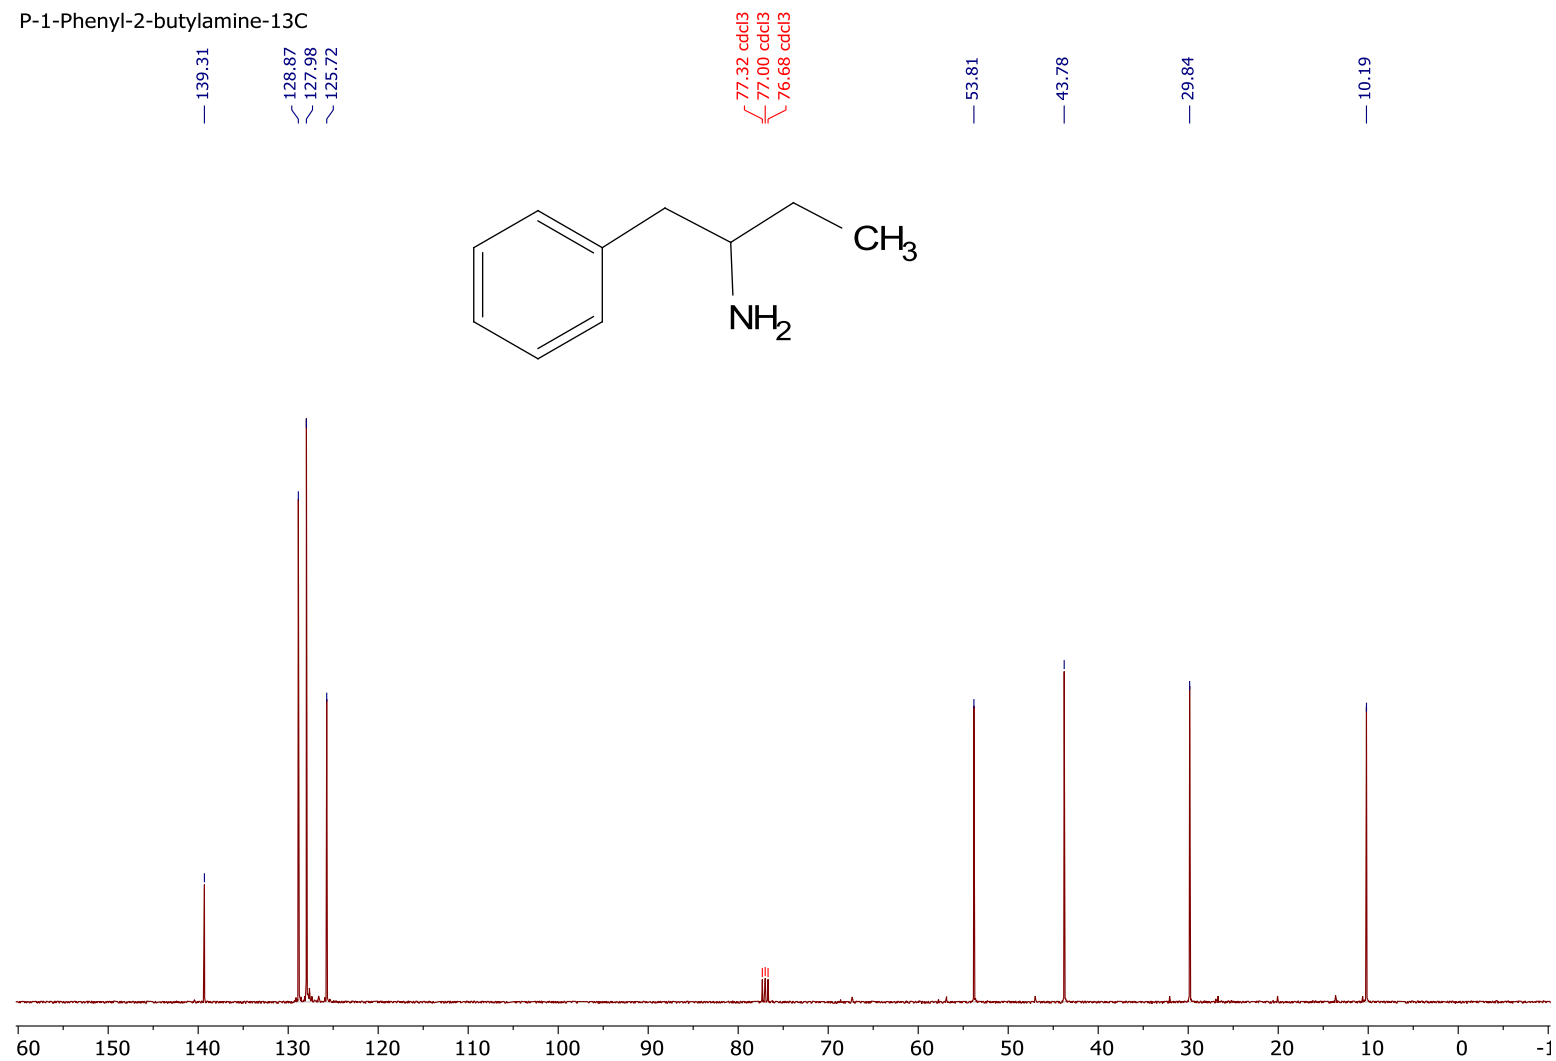 $^{13}\text{C}$ -NMR spectrum of 1-phenyl-2-butylamine **17b**

6-ethylpraziquanamine-1H

STANDARD PROTON PARAMETERS

5.13 5.13 5.11 5.09 5.08 5.07 4.69 4.68 4.66 4.65 3.72 3.68 3.58 3.53 3.11 3.09 3.07 3.05 2.91 2.88 2.85 2.67 2.67 2.63 2.62 1.50 1.49 1.48 1.46 1.44 1.42 1.41 1.39 1.37 1.36 1.34 0.93 0.91 0.89

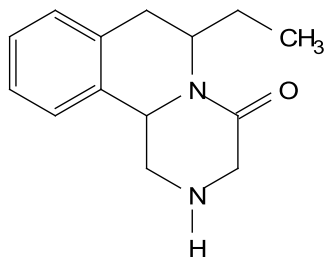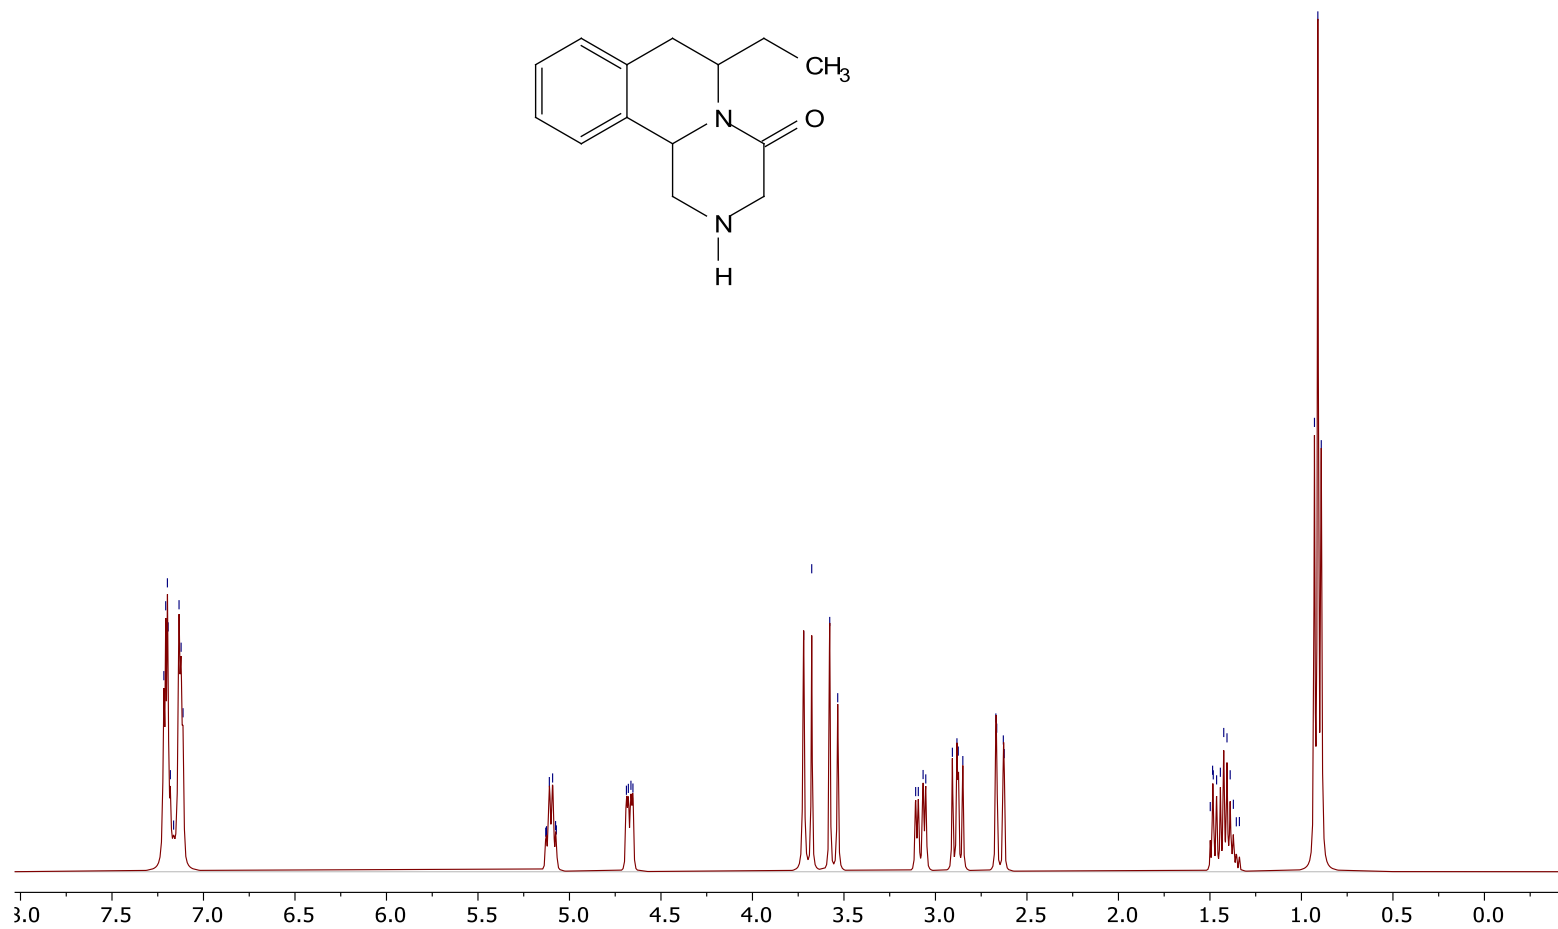<sup>1</sup>H-NMR spectrum of 6-ethylpraziquanamine **21b**

6-ethylpraziquanamine- $^{13}\text{C}$   
STANDARD CARBON PARAMETERS

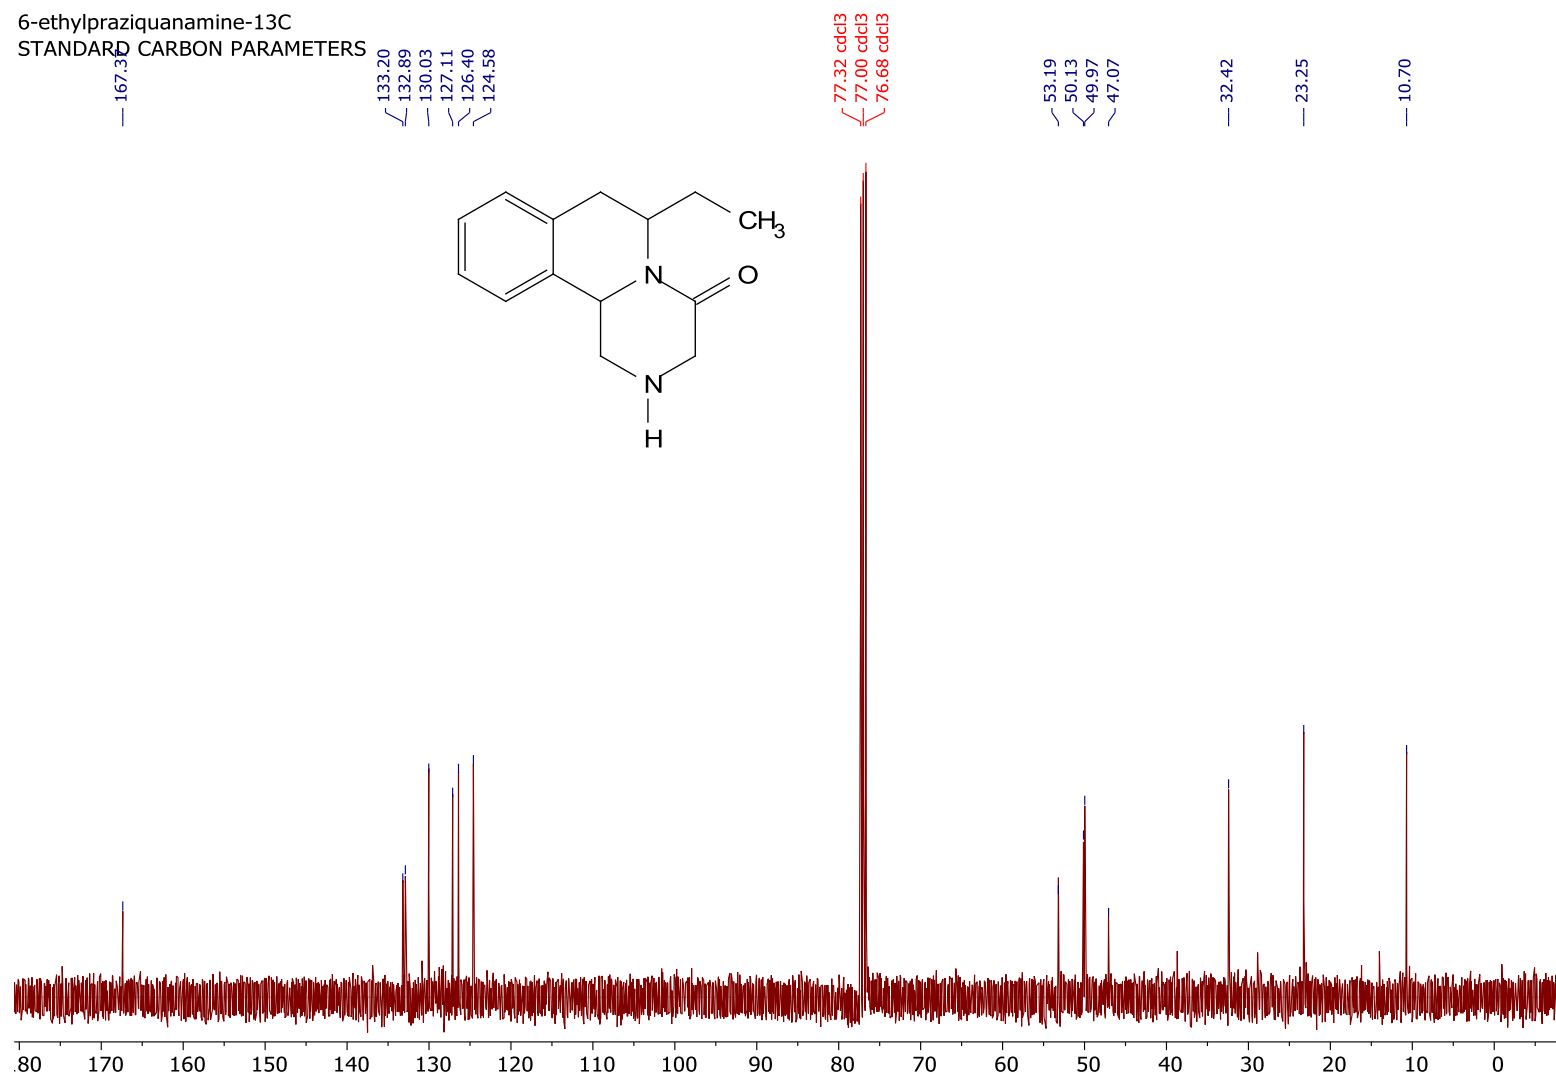

$^{13}\text{C}$ -NMR spectrum of 6-ethylpraziquanamine **21b**



FMK-4-1H  
NHC

7.27  
7.25  
7.24  
7.23  
7.15

5.22  
4.98  
4.94  
4.72  
4.70  
4.43  
4.39  
4.38  
4.12  
4.08

3.14  
3.13  
3.10  
3.09  
2.97  
2.95  
2.92  
2.62  
2.58  
2.48  
2.45  
2.42

1.53  
1.50  
1.47  
1.26  
1.24  
1.20  
1.18  
1.16  
1.12  
1.11

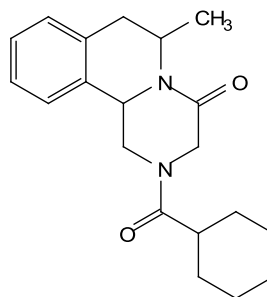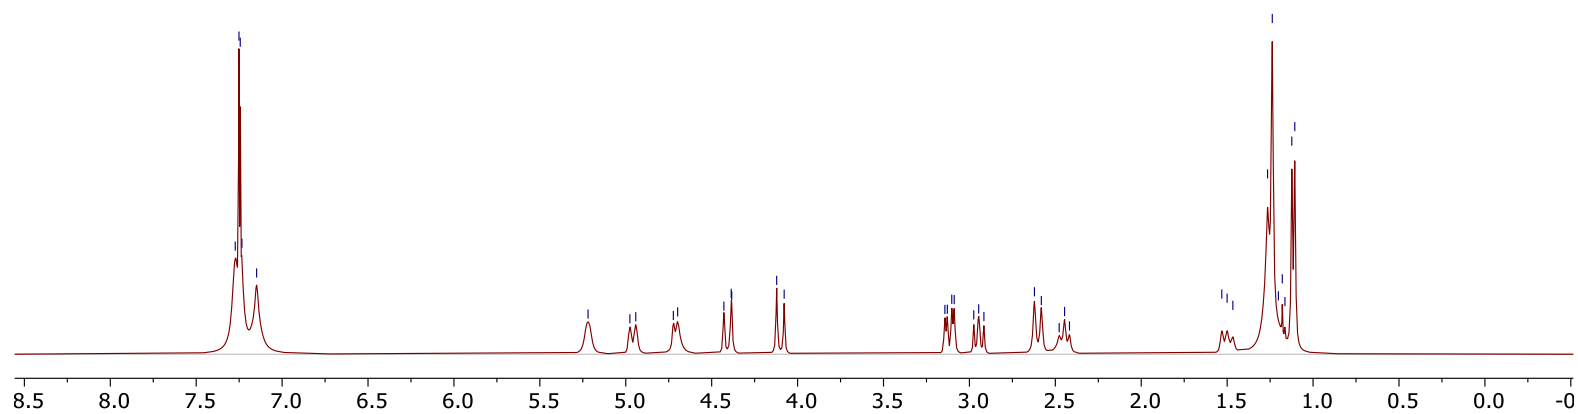

<sup>1</sup>H-NMR spectrum of 2-(Cyclohexylcarbonyl)-6-methyl-1,2,3,6,7,11b-hexahydro-4H-pyrazino[2,1-a]isoquinolin-4-one,  
6-methylpraziquantel **22**

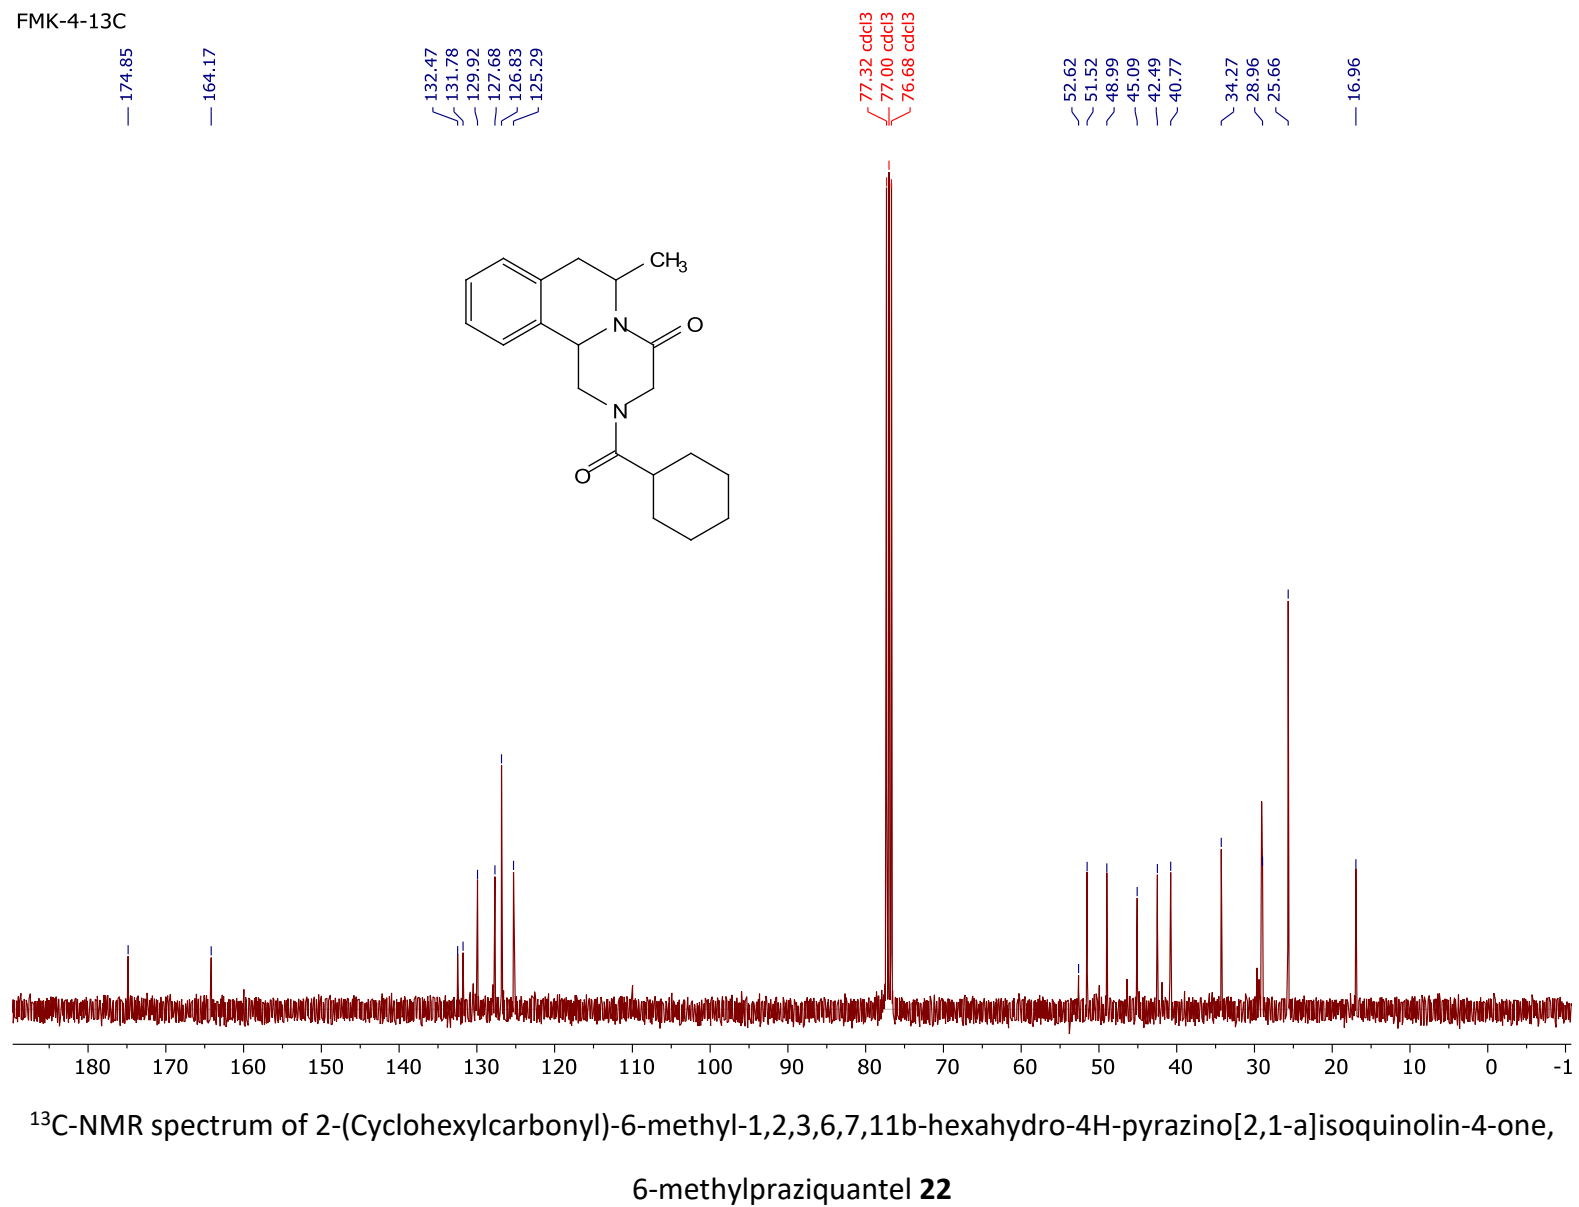

FMK-23-1H

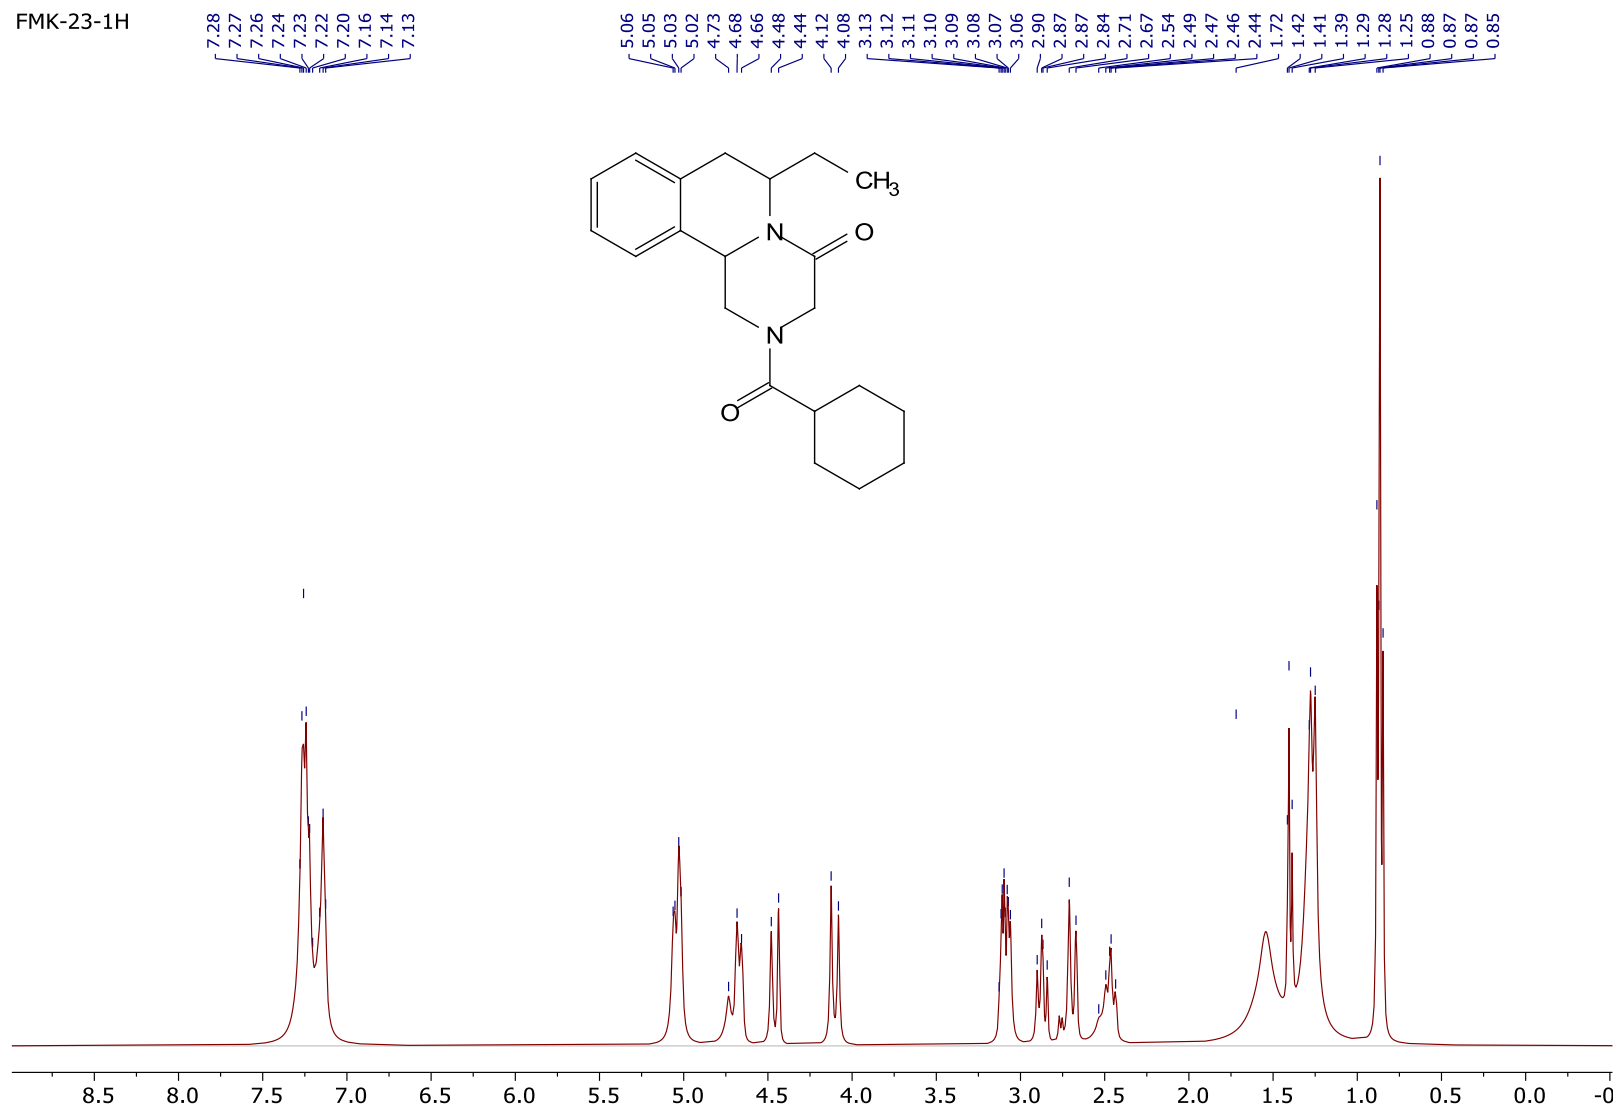

<sup>1</sup>H-NMR spectrum of 2-Cyclohexanecarbonyl-6-ethyl-1,2,3,6,7,11b-hexahydro-pyrazino[2,1-a]isoquinolin-4-one, 6-ethylpraziquantel **23**

FMK-23-13C  
19F SENSITIVITY

0.05% Trifluorotoluene in Benzene-d<sub>6</sub>

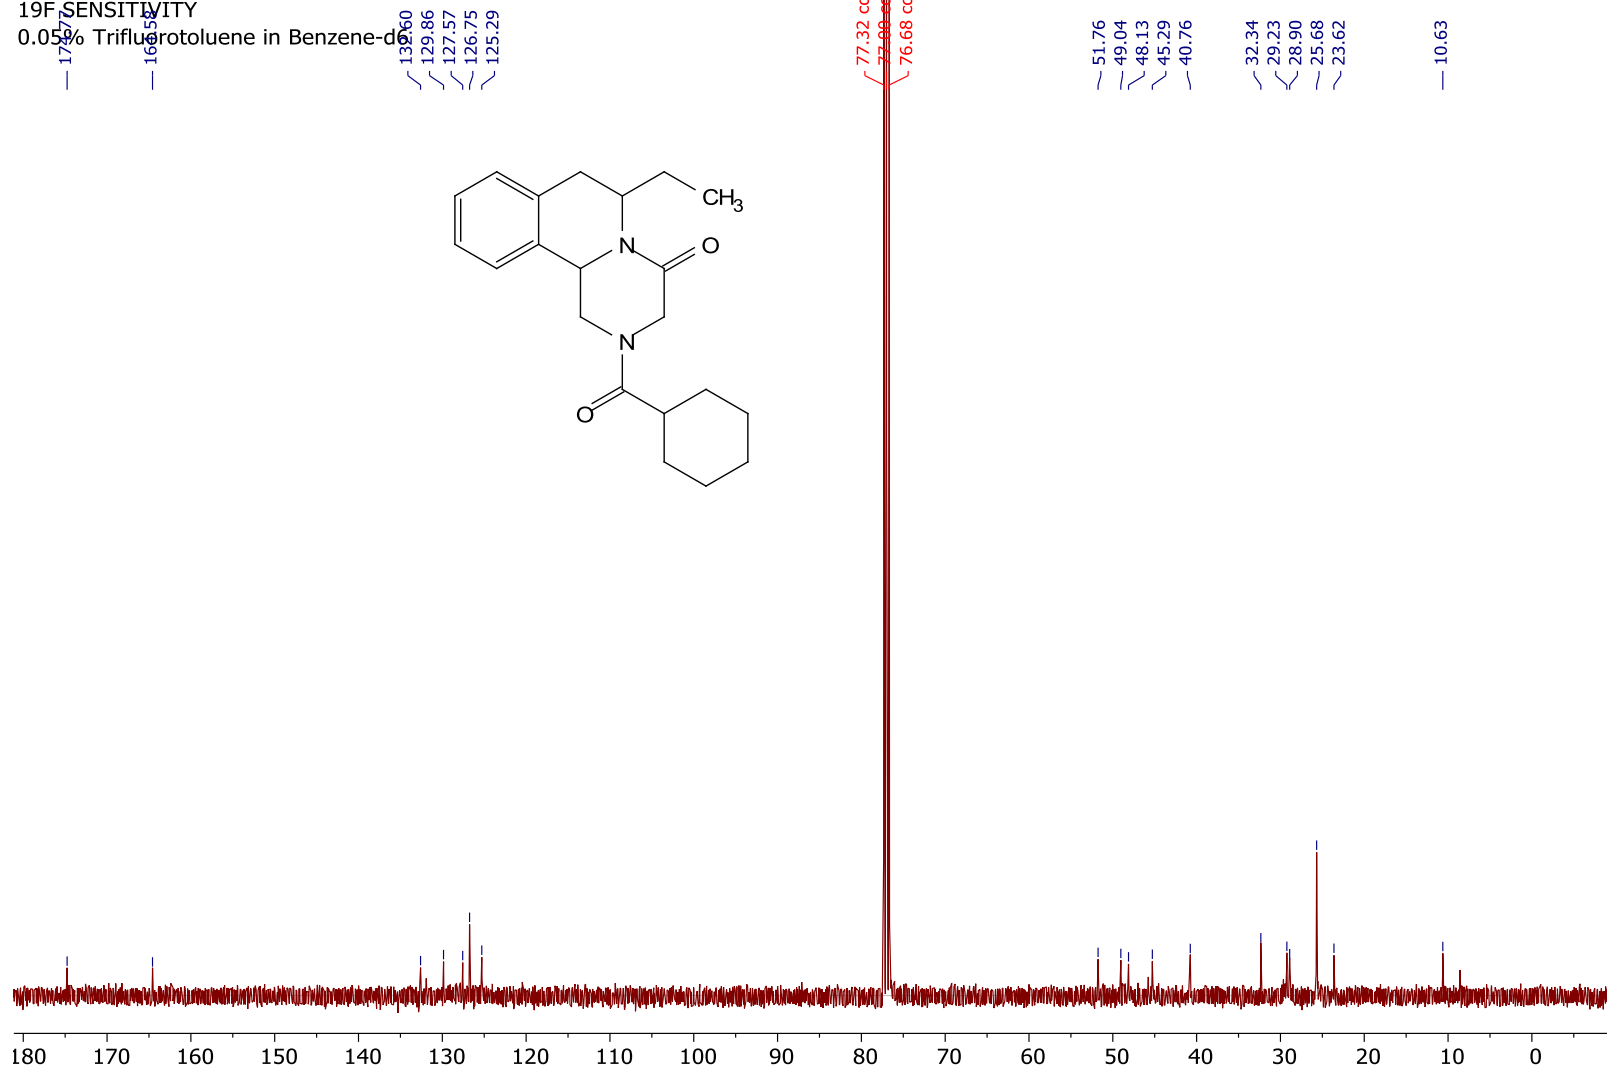

<sup>13</sup>C-NMR spectrum of 2-Cyclohexanecarbonyl-6-ethyl-1,2,3,6,7,11b-hexahydro-pyrazino[2,1-a]isoquinolin-4-one, 6-ethylpraziquantel **23**

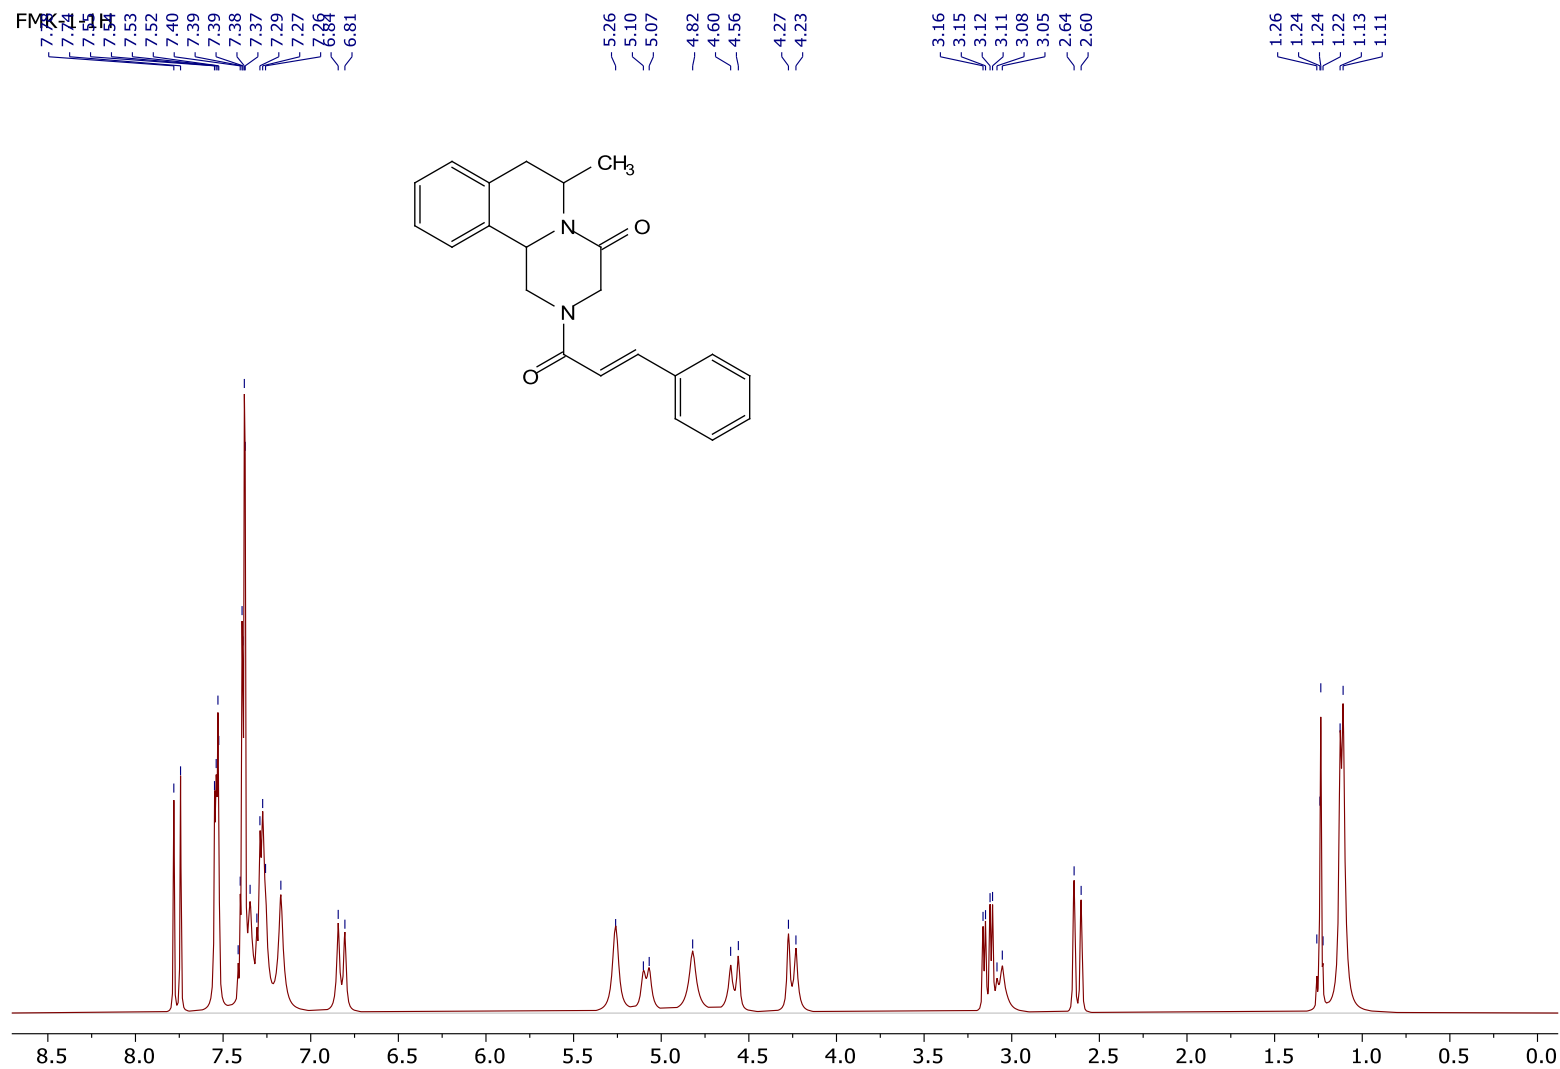

<sup>1</sup>H-NMR spectrum of 6-Methyl-2-[(2E)-3-phenylprop-2-enoyl]-1,2,3,6,7,11b-hexahydro-4H-pyrazino[2,1-a]isoquinolin-4-one **24**

FMK-1-13C  
STANDARD PROTON PARAMETERS

— 163.94

— 144.38

— 134.77

— 130.12

— 128.91

— 127.98

— 126.90

— 125.49

— 115.89

— 51.58

— 49.10

— 45.67

— 42.51

— 34.35

— 16.96

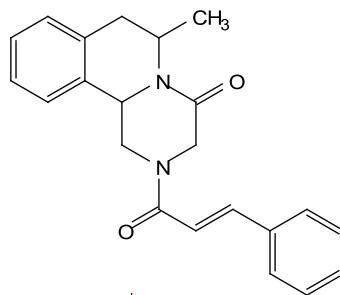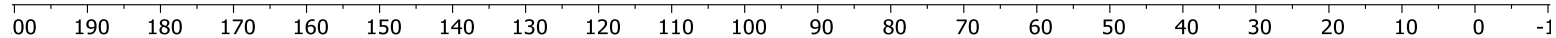

$^{13}\text{C}$ -NMR spectrum of 6-Methyl-2-[(2*E*)-3-phenylprop-2-enoyl]-1,2,3,6,7,11b-hexahydro-4H-pyrazino[2,1-a]isoquinolin-4-one **24**

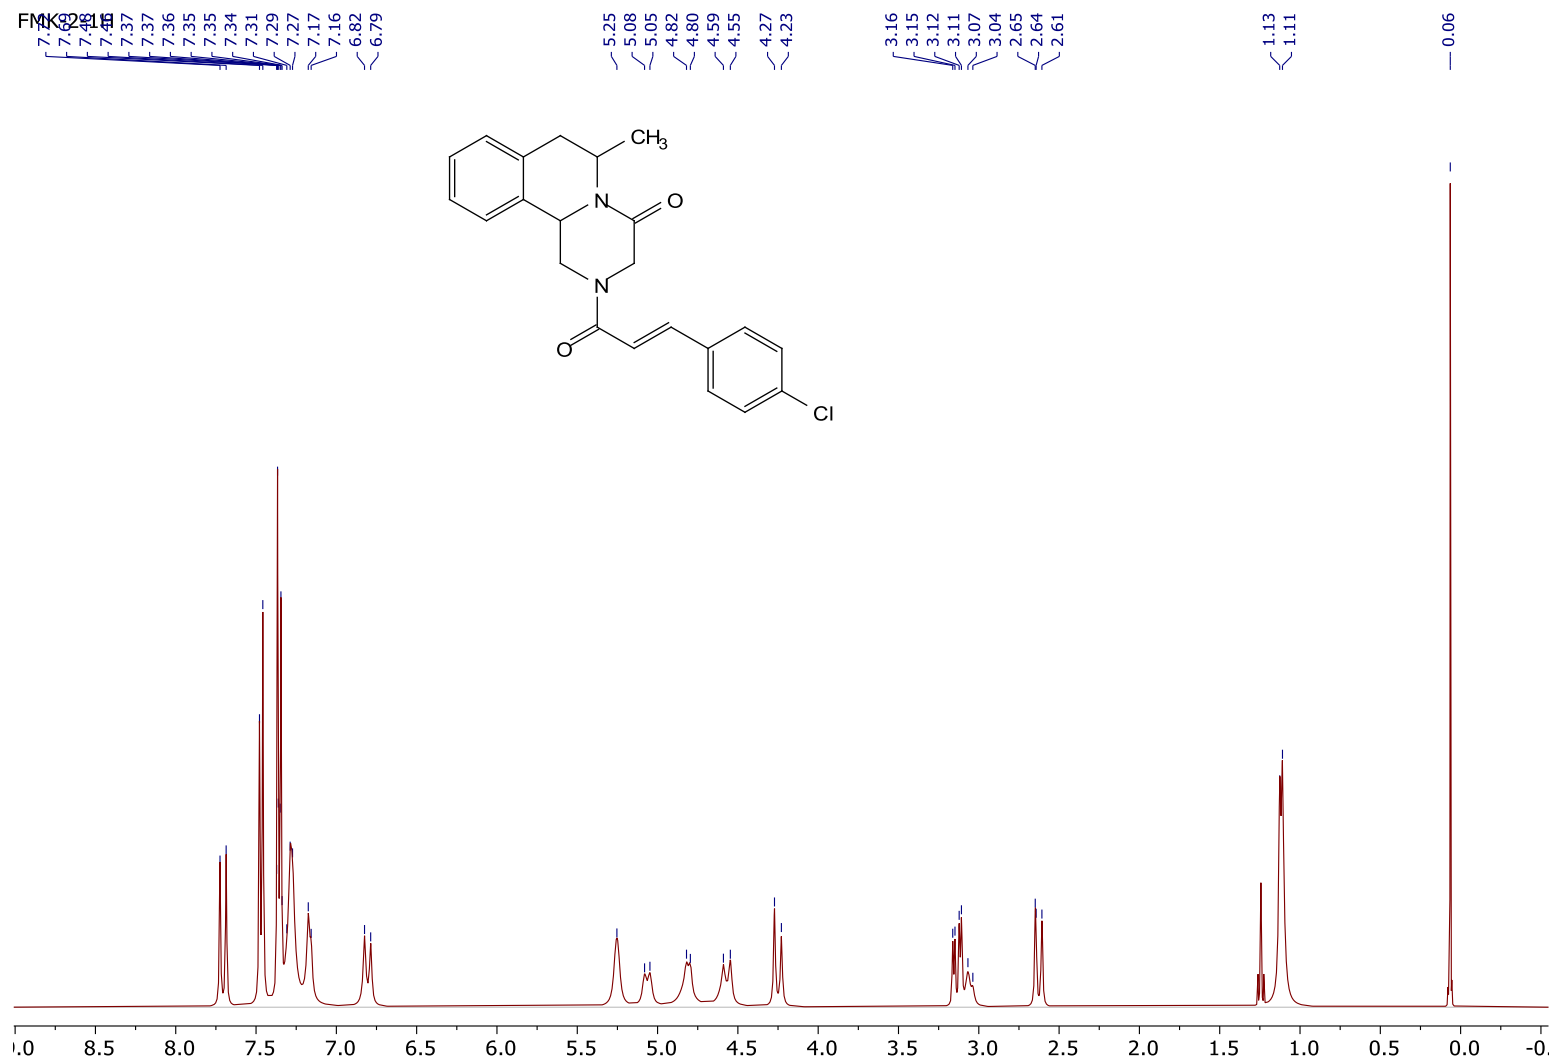

<sup>1</sup>H-NMR spectrum of 2-[(*E*)-3-(4-Chlorophenyl)prop-2-enoyl]-6-methyl-1,2,3,6,7,11b-hexahydro-4H-pyrazino[2,1-a]isoquinolin-4-one **25**

FMK-2-13C  
 19F SENSITIVITY  
 0.05% TMS

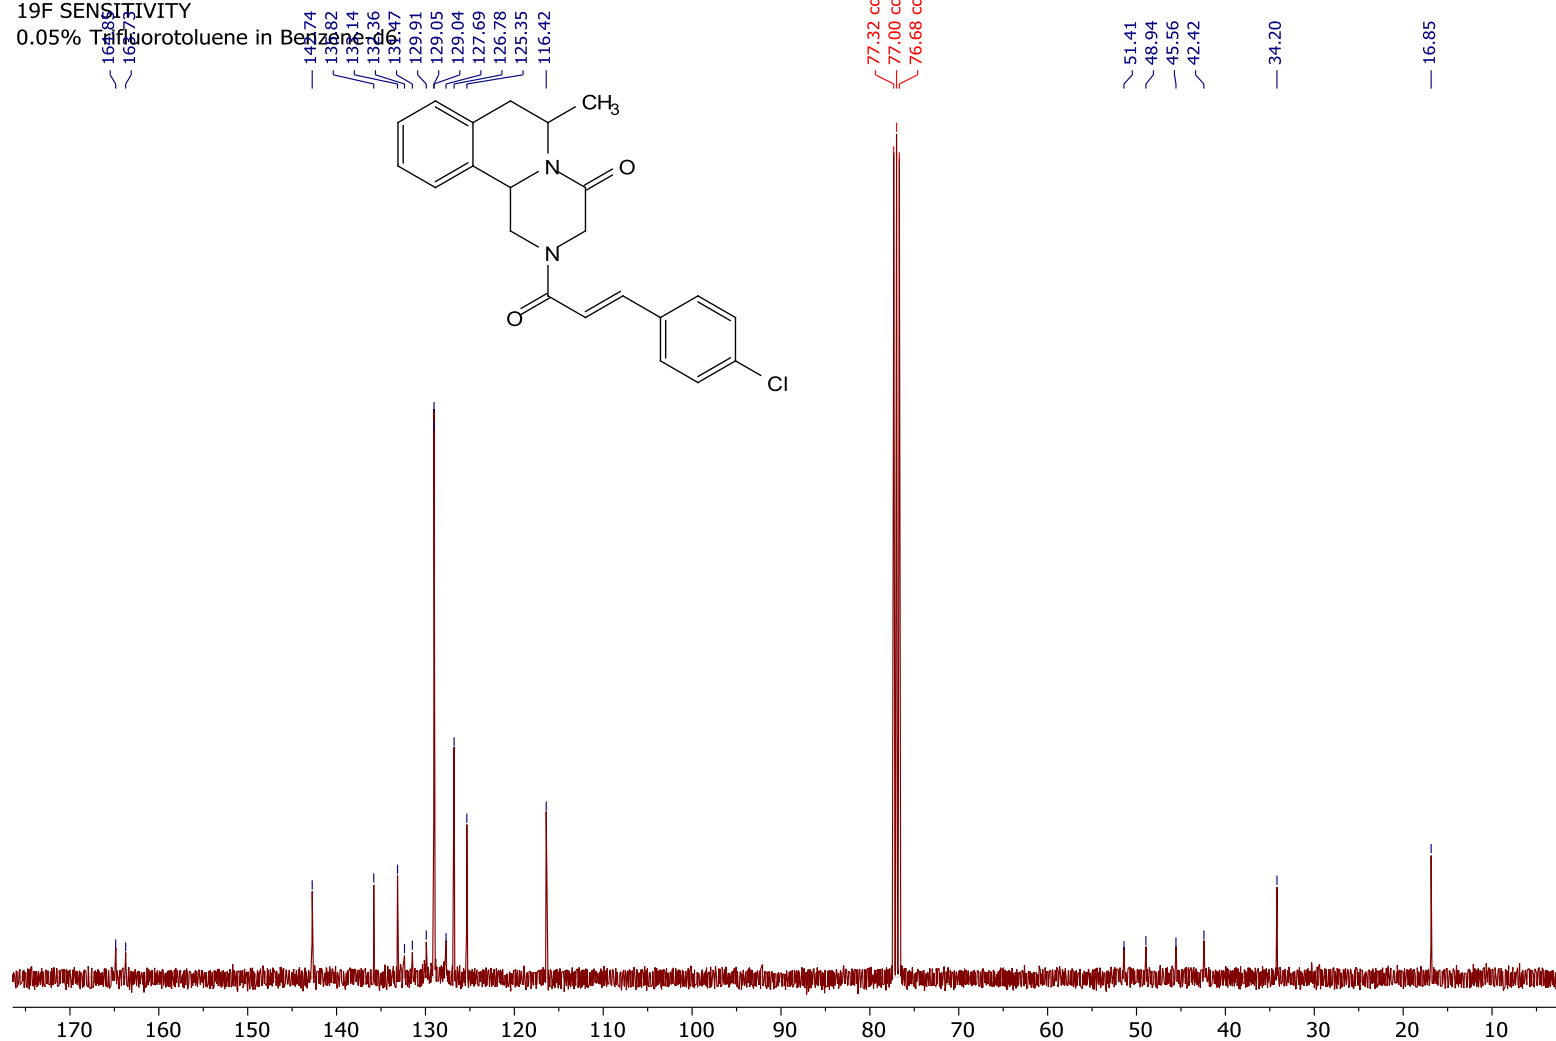

<sup>13</sup>C-NMR spectrum of 2-[(2*E*)-3-(4-Chlorophenyl)prop-2-enoyl]-6-methyl-1,2,3,6,7,11b-hexahydro-4H-pyrazino[2,1-a]isoquinolin-4-one **25**



FMIC 311  
 Calibration for 4huc on 17 Aug 2021  
 Sample : C13 enriched CH31 in CDCl3

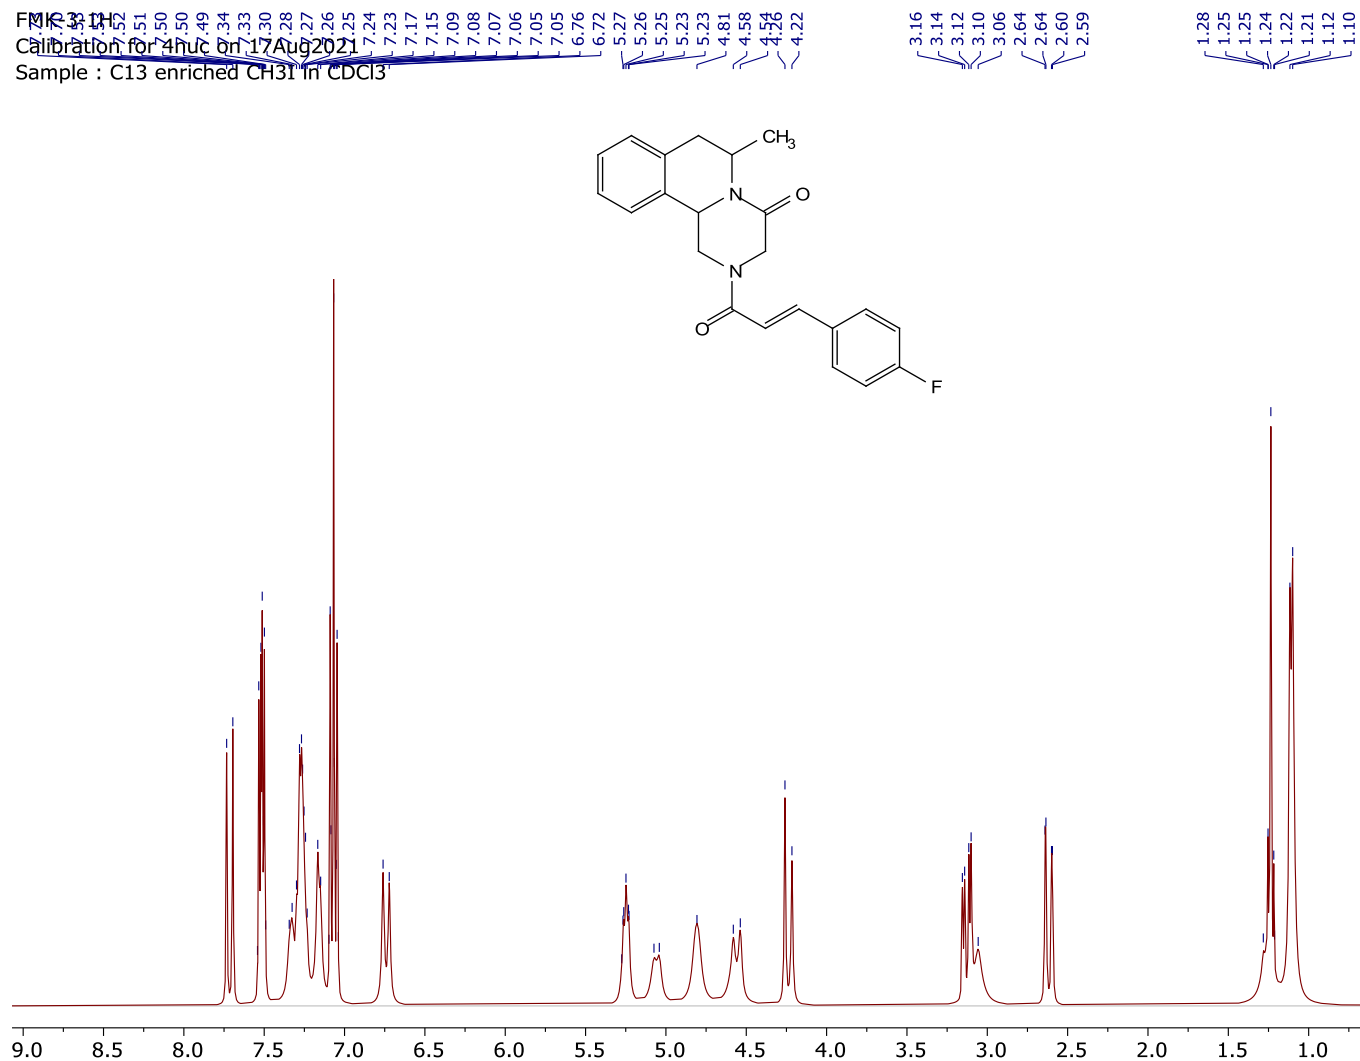

<sup>1</sup>H-NMR spectrum of 2-[(*E*)-3-(4-Fluorophenyl)prop-2-enoyl]-6-methyl-1,2,3,6,7,11b-hexahydro-4H-pyrazino[2,1-a]isoquinolin-4-one **26**

FMK-3-13C

STANDARD PROTON PARAMETERS

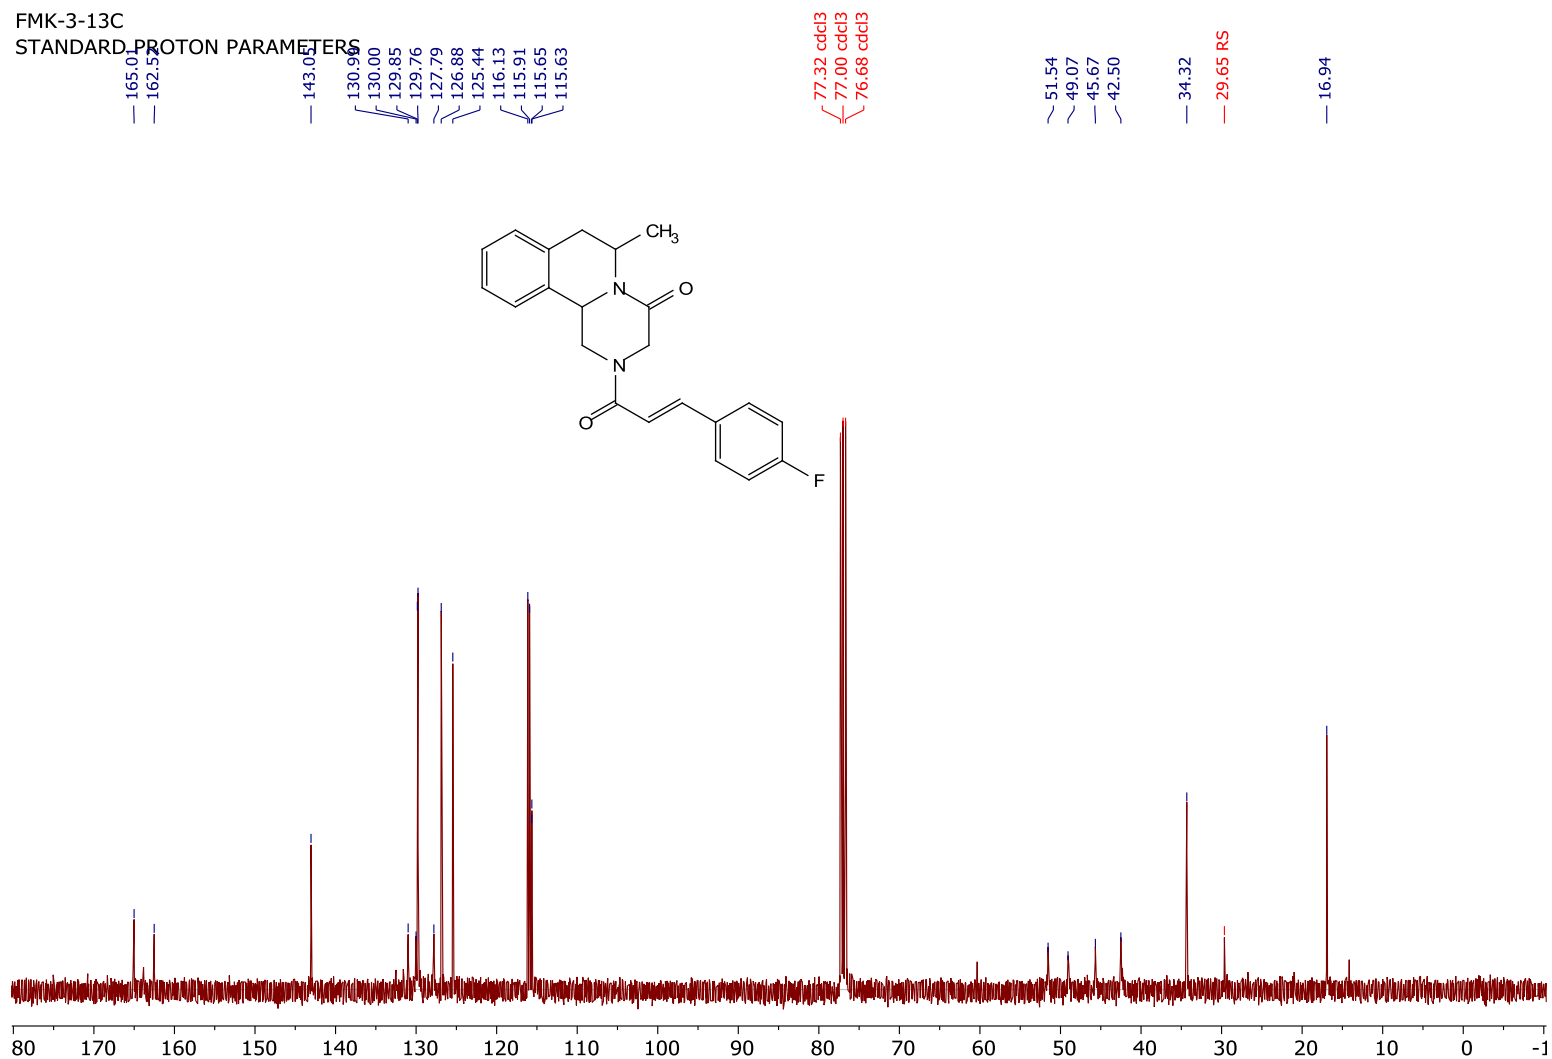<sup>13</sup>C-NMR spectrum of 2-[(2E)-3-(4-Fluorophenyl)prop-2-en-1-yl]-6-methyl-1,2,3,6,7,11b-hexahydro-4H-pyrazino[2,1-a]isoquinolin-4-one **26**

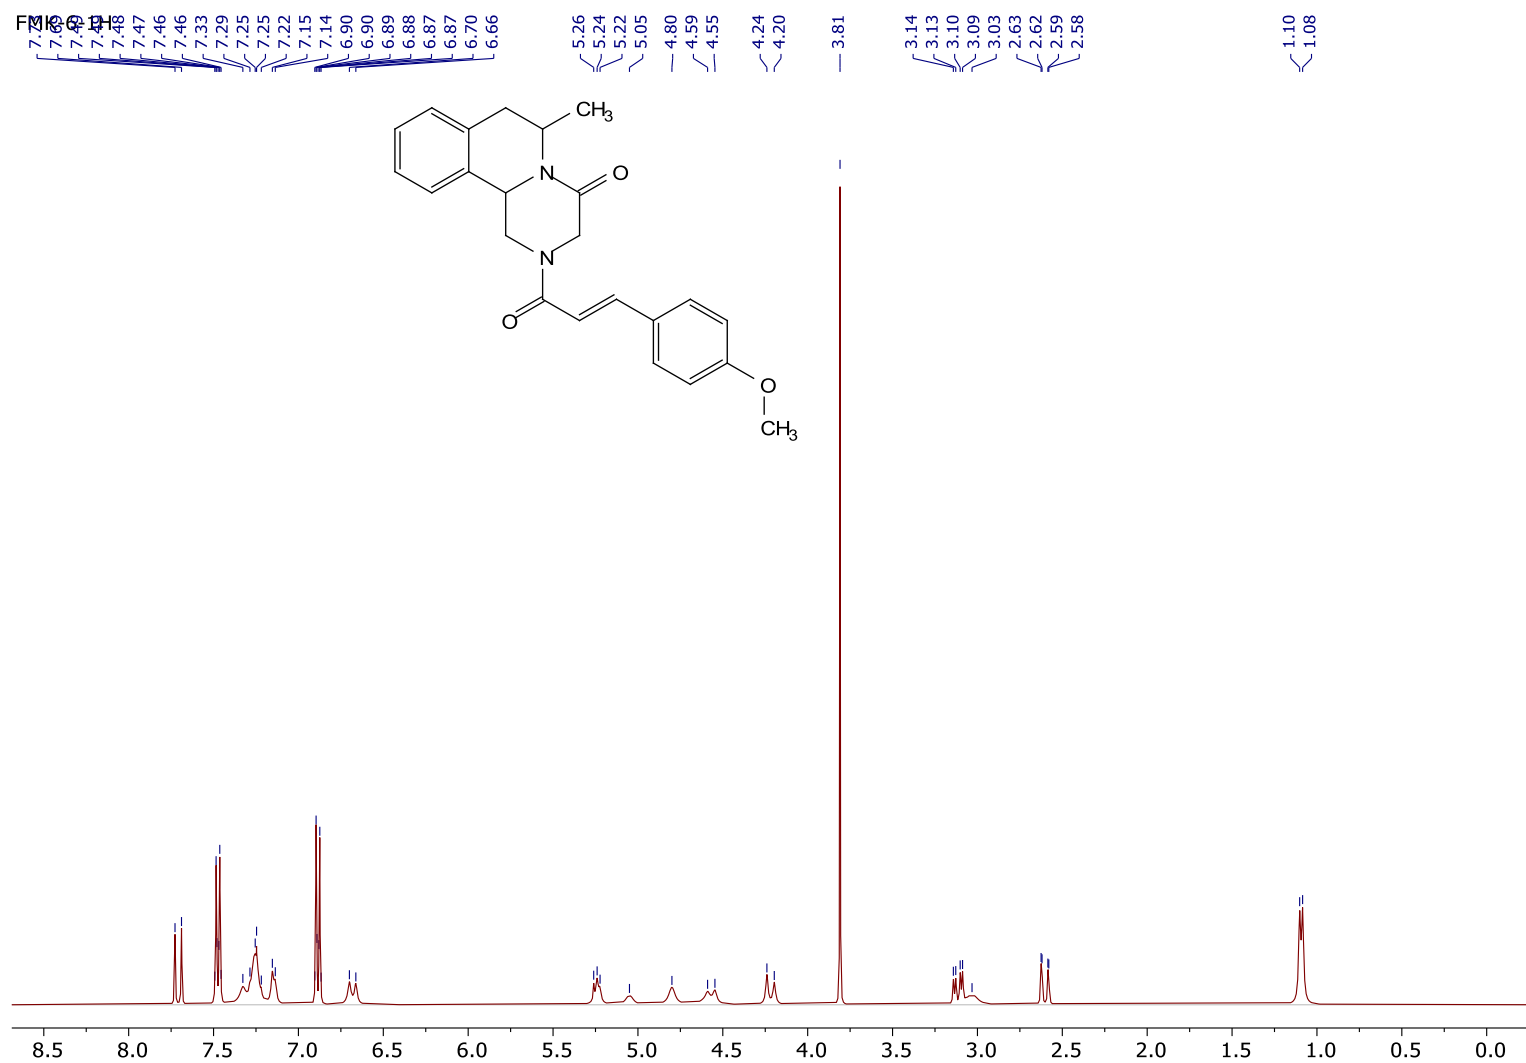

<sup>1</sup>H-NMR spectrum of 2-[(2E)-3-(4-Methoxy-phenyl)prop-2-enoyl]-6-methyl-1,2,3,6,7,11b-hexahydro-pyrido[2,1-a]isoquinolin-4-one **27**

FMK-6-13C

STANDARD PROTON PARAMETERS

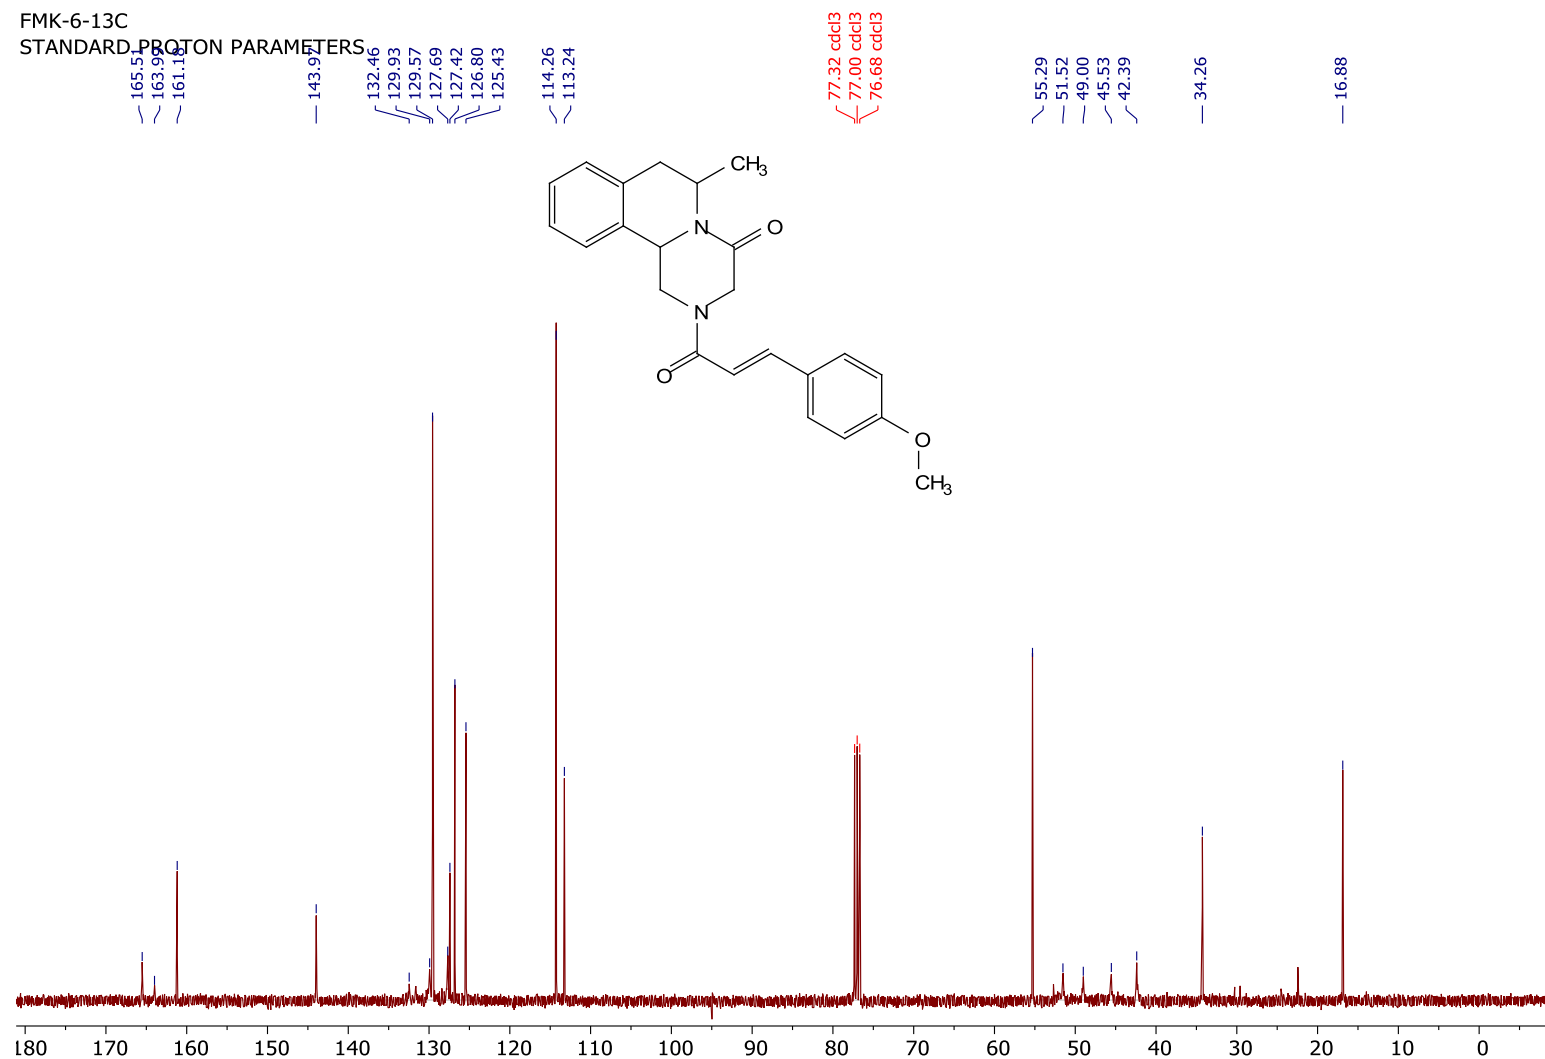

$^{13}\text{C}$ -NMR spectrum of 2-[(2*E*)-3-(4-Methoxy-phenyl)prop-2-enoyl]-6-methyl-1,2,3,6,7,11b-hexahydro-pyrido[2,1-a]isoquinolin-4-one **27**

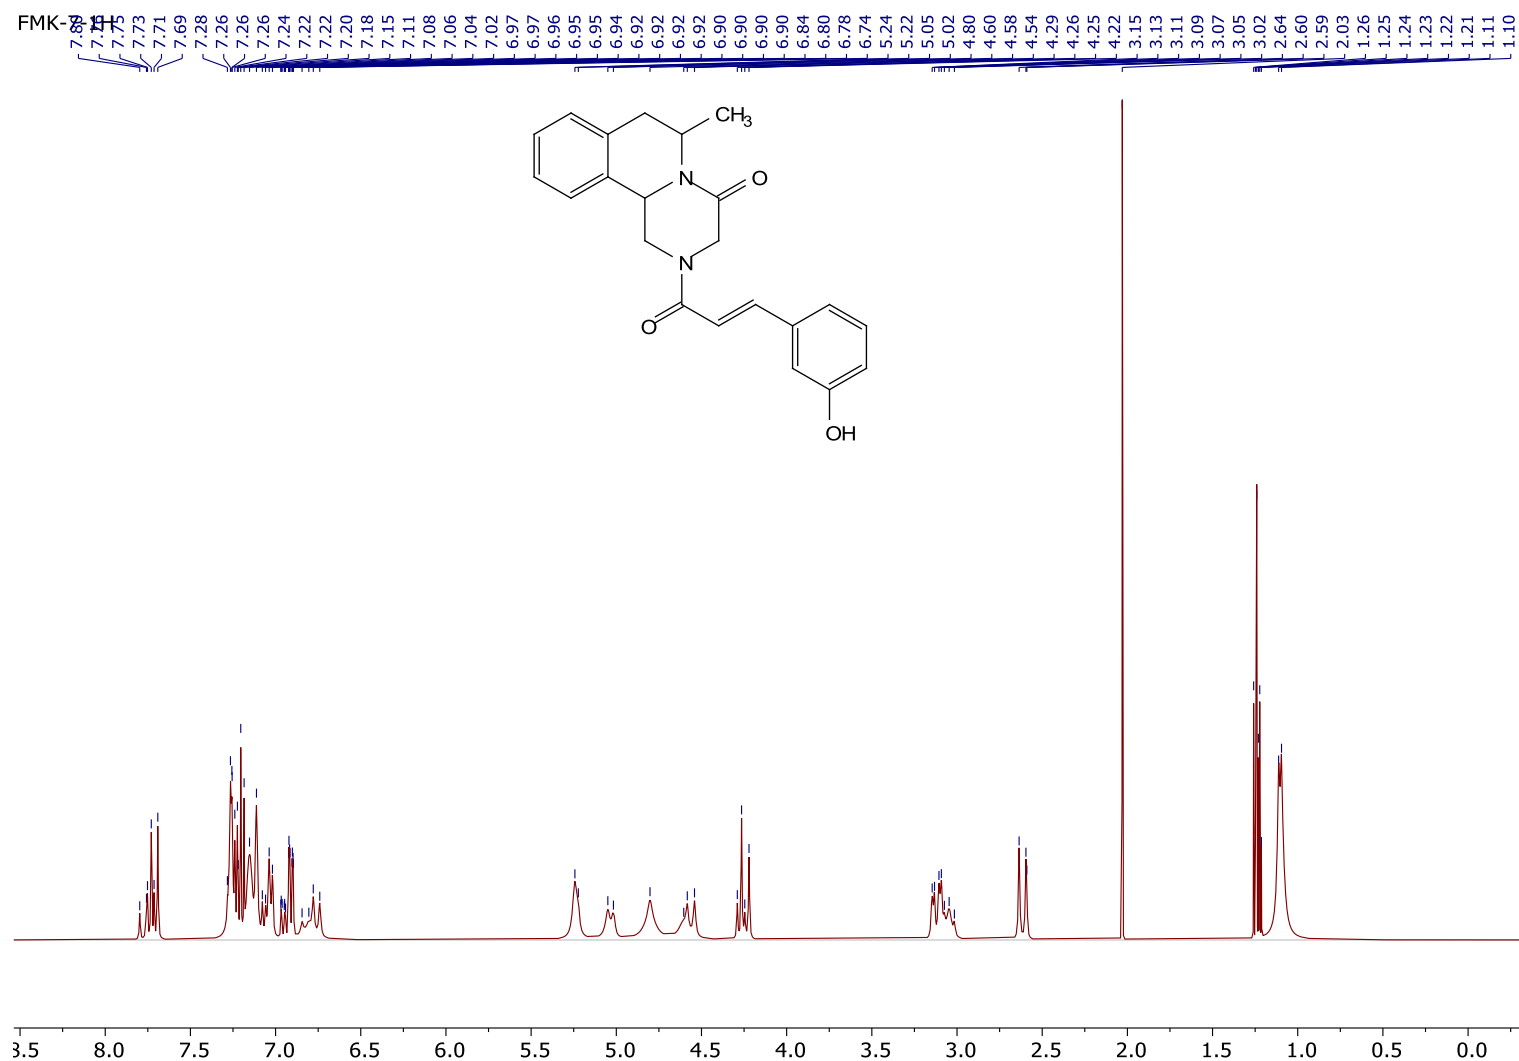

<sup>1</sup>H-NMR spectrum of 2-[(2E)-3-(3-Hydroxyphenyl)prop-2-enoyl]-6-methyl-1,2,3,6,7,11b-hexahydro-4H-pyrazino[2,1-a]isoquinolin-4-one **28**

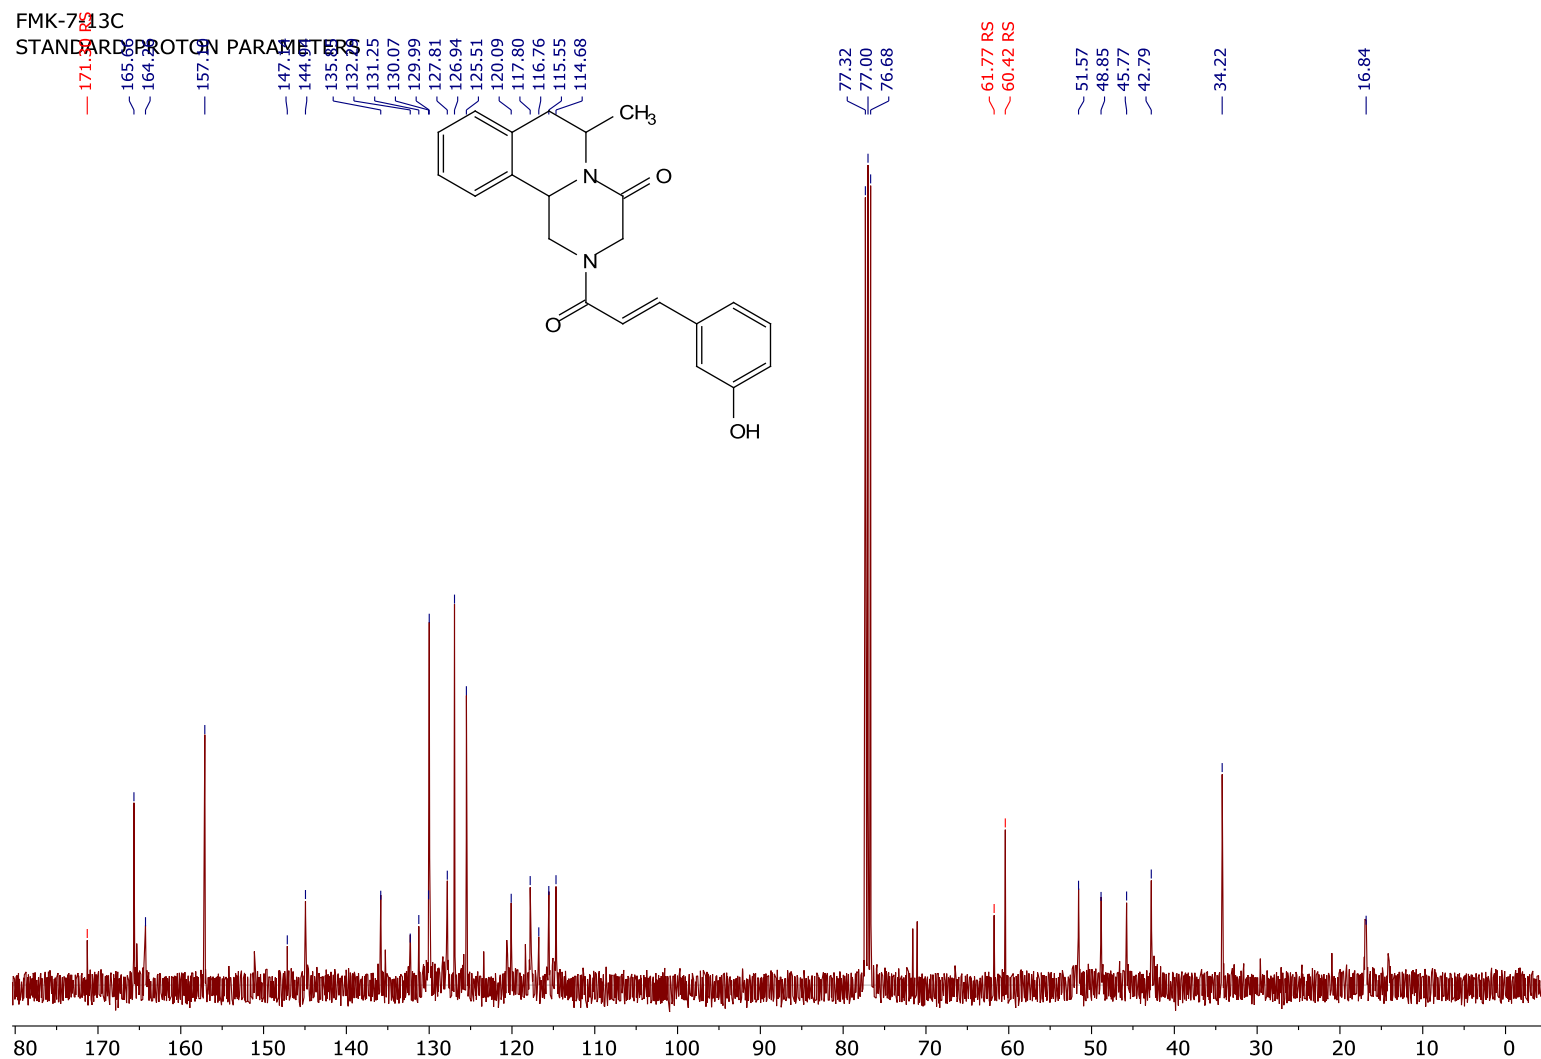

<sup>13</sup>C-NMR spectrum of 2-[(2E)-3-(3-Hydroxyphenyl)prop-2-enyl]-6-methyl-1,2,3,6,7,11b-hexahydro-4H-pyrazino[2,1-a]isoquinolin-4-one **28**

FMK08117  
 19F SENSITIVITY  
 0.05% Trifluorotoluene in Benzene-d6

5.28  
5.28  
5.27  
5.25  
5.09  
5.05  
4.90  
4.84  
4.82  
4.61  
4.57  
4.32  
4.27  
3.18  
3.16  
3.14  
3.12  
3.10  
3.07  
2.66  
2.62

1.14  
1.13

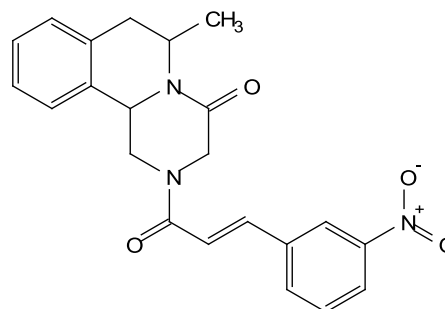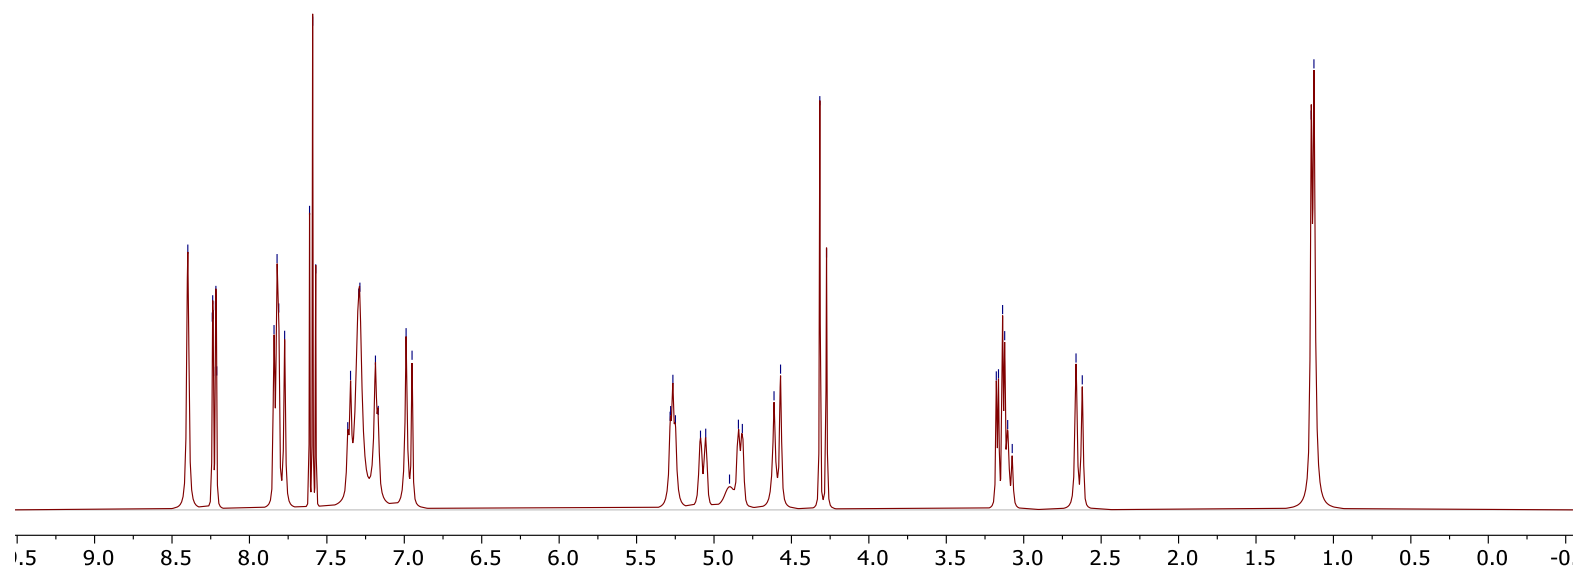

$^1\text{H}$ -NMR spectrum of 2-[(*E*)-3-(3-Nitrophenyl)prop-2-enoyl]- 6-methyl-1,2,3,6,7,11b-hexahydro-4H-pyrazino[2,1-a]isoquinolin-4-one **29**

FMK-8-13C

STANDARD PROTON PARAMETERS

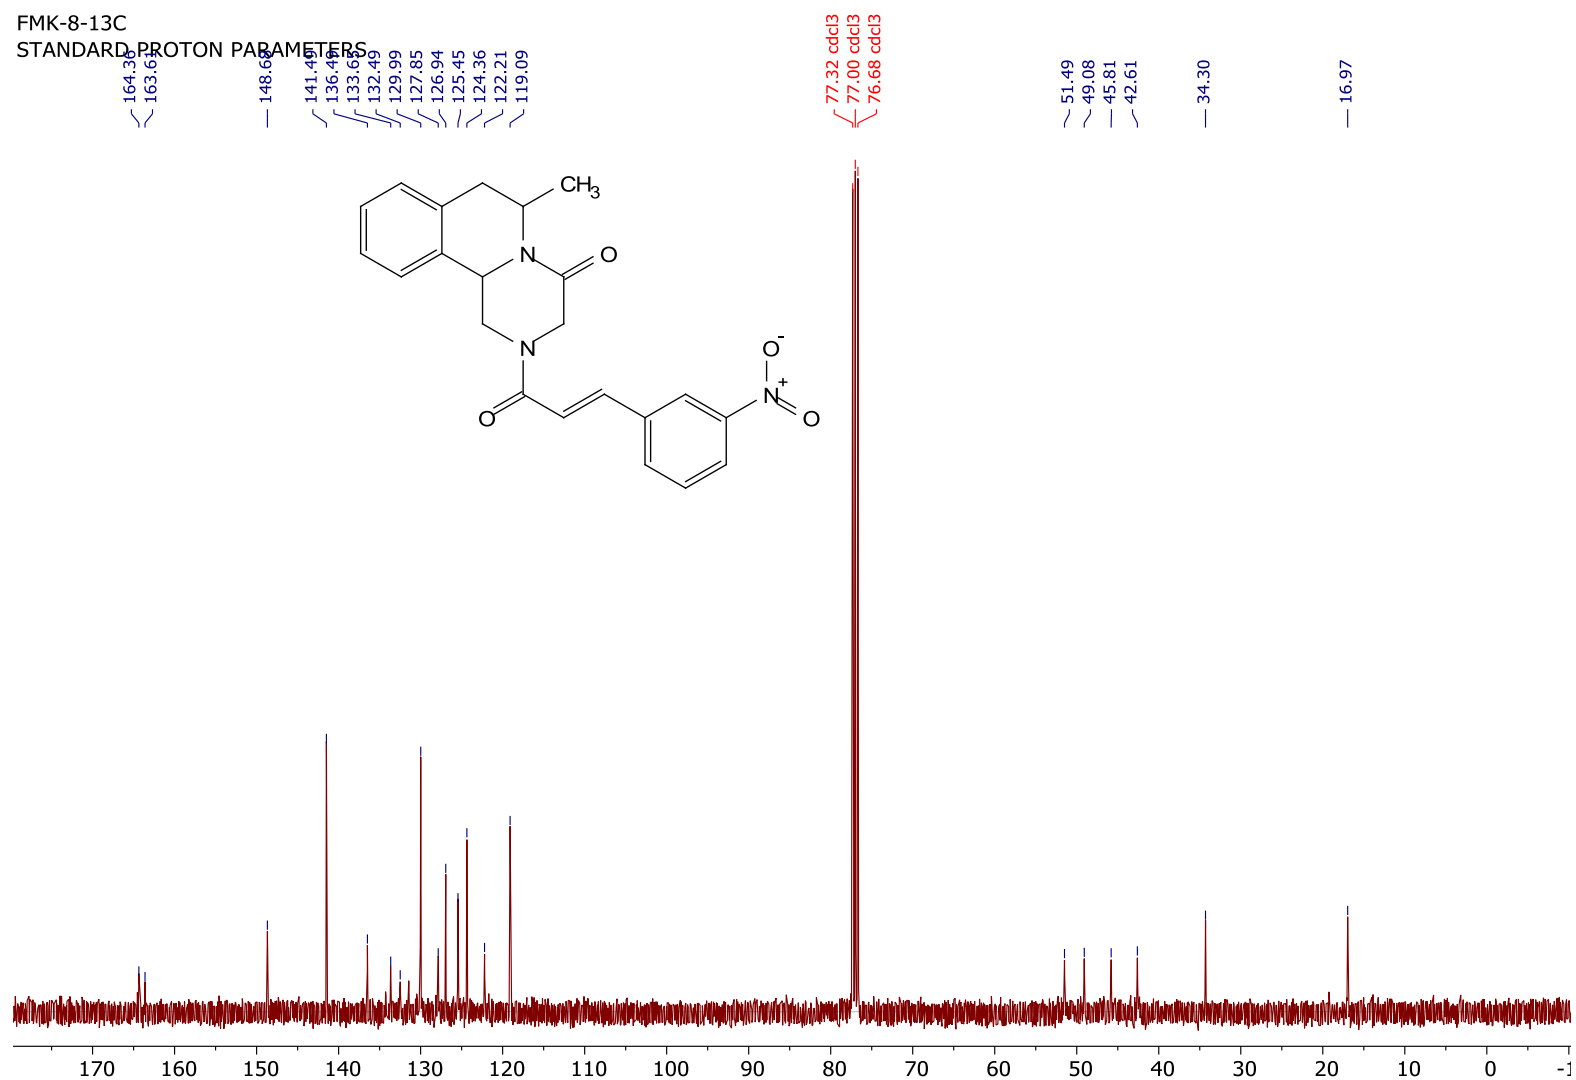

<sup>13</sup>C-NMR spectrum of 2-[(*E*)-3-(3-Nitrophenyl)prop-2-enoyl]- 6-methyl-1,2,3,6,7,11b-hexahydro-4H-pyrazino[2,1-a]isoquinolin-4-one **29**



FMK-9-1H

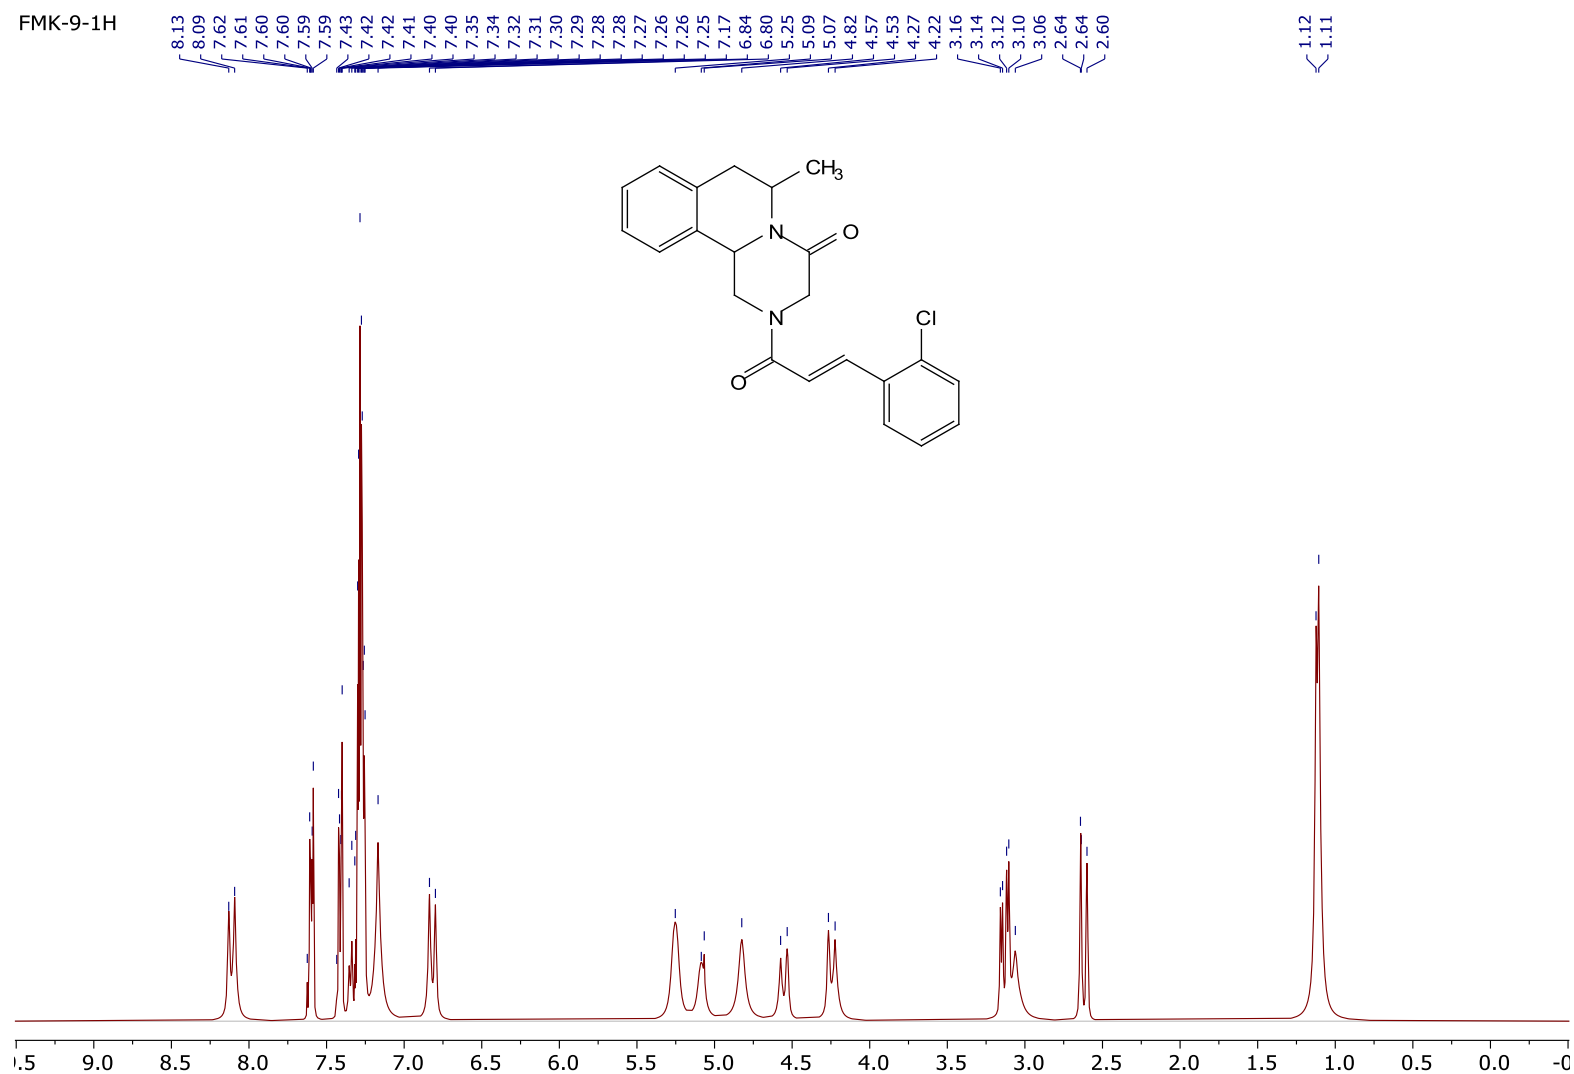

<sup>1</sup>H-NMR spectrum of 2-[(2*E*)-3-(2-Chlorophenyl)prop-2-enoyl]-6-methyl-1,2,3,6,7,11b-hexahydro-4H-pyrazino[2,1-a]isoquinolin-4-one **30**

FMK-9-13C  
STANDARD PROTON PARAMETERS

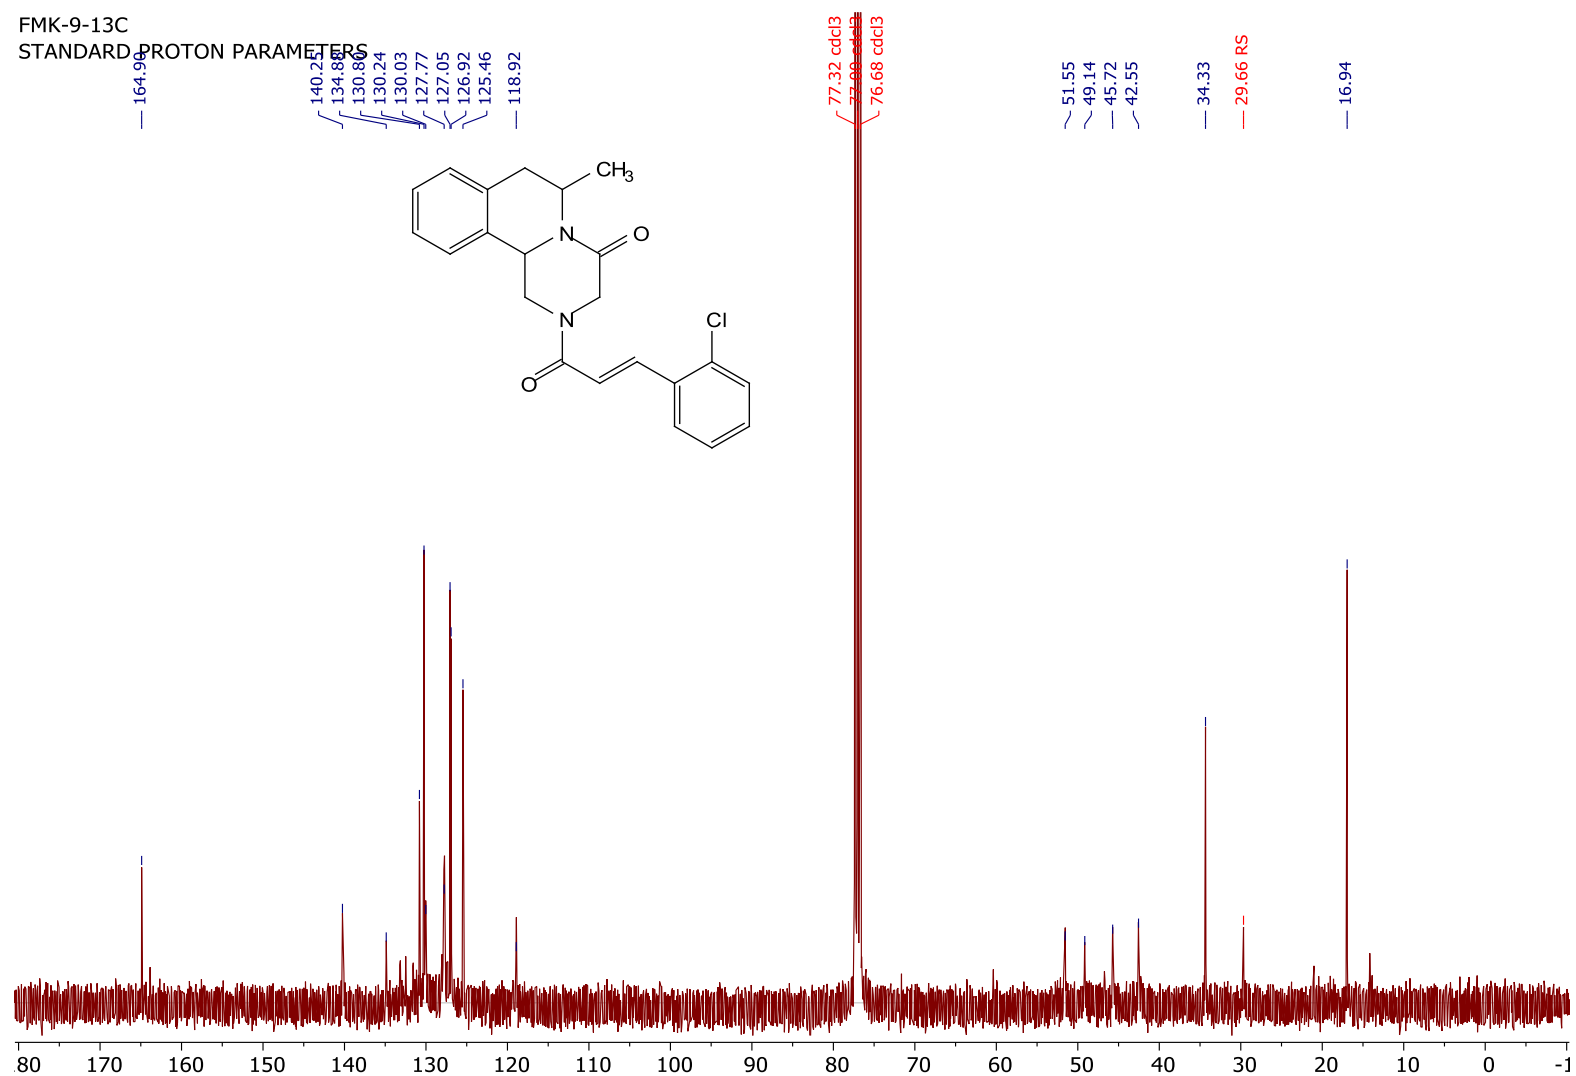

<sup>13</sup>C-NMR spectrum of 2-[(2E)-3-(2-Chlorophenyl)prop-2-enoyl]-6-methyl-1,2,3,6,7,11b-hexahydro-4H-pyrazino[2,1-a]isoquinolin-4-one **30**

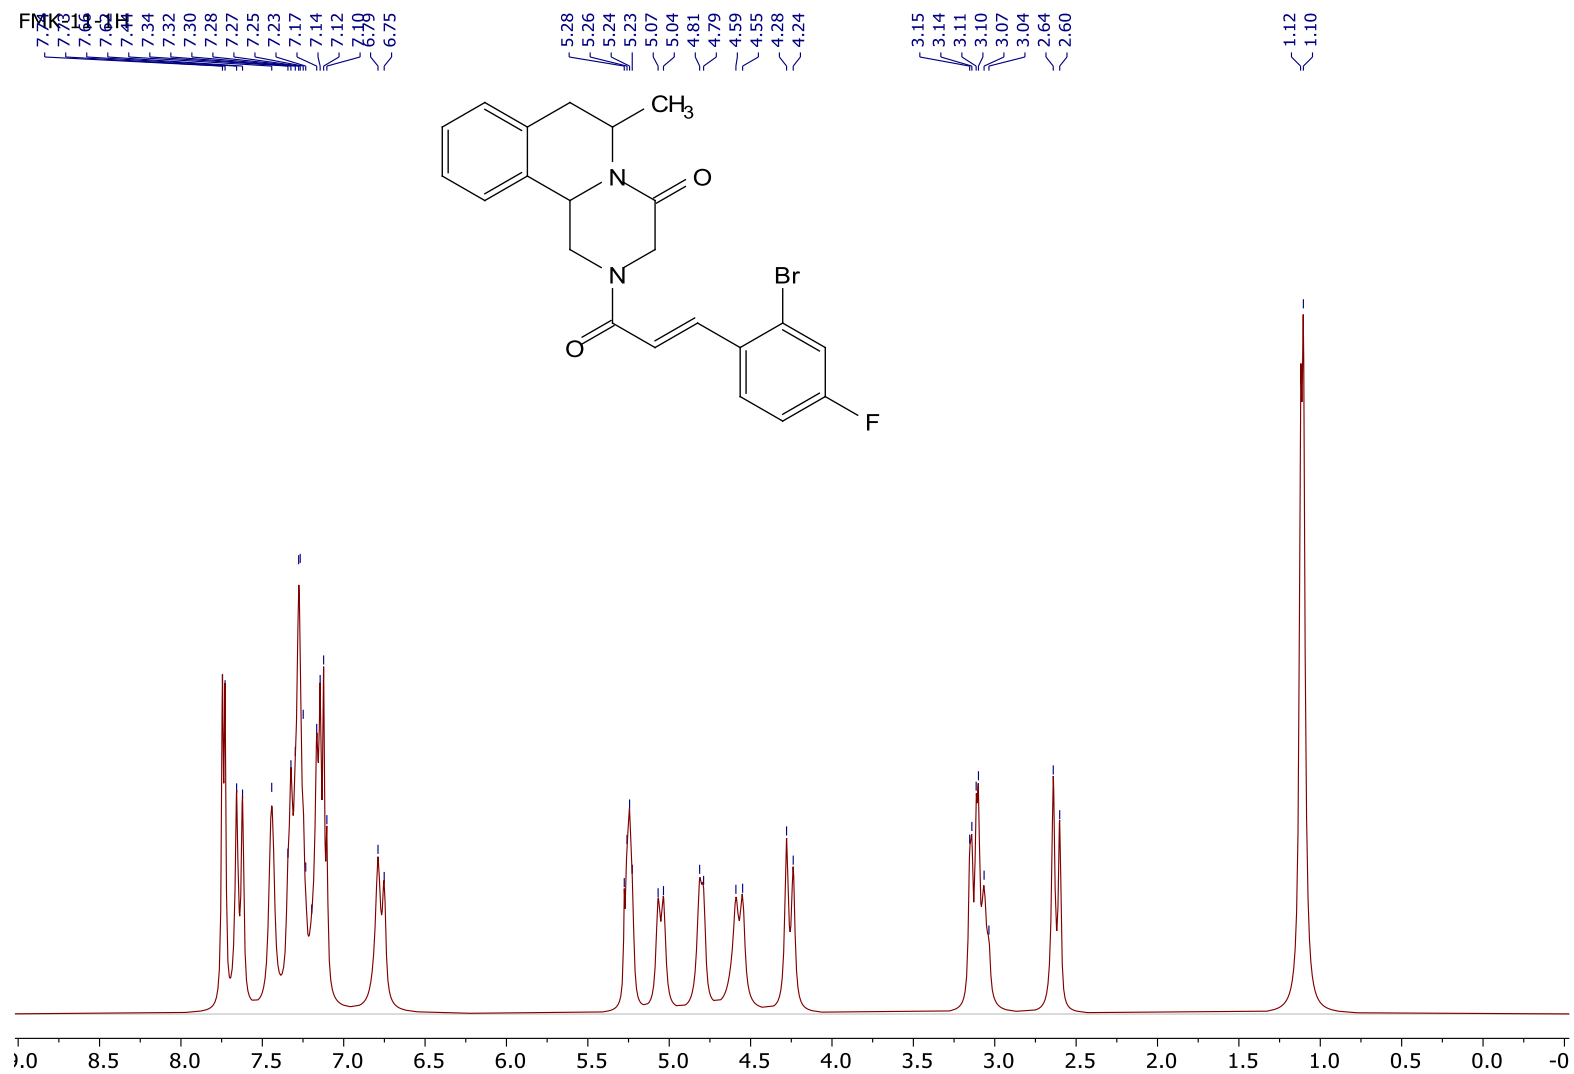

$^1\text{H}$ -NMR spectrum of 2-[(2E)-3-(2-Bromo-4-fluorophenyl)prop-2-enoyl]-6-methyl-1,2,3,6,7,11b-hexahydro-4H-pyrazino[2,1-a]isoquinolin-4-one

**31**

FMK-11-13C

19F SENSITIVITY

0.05% Trifluorobenzene in Benzene-d<sub>6</sub>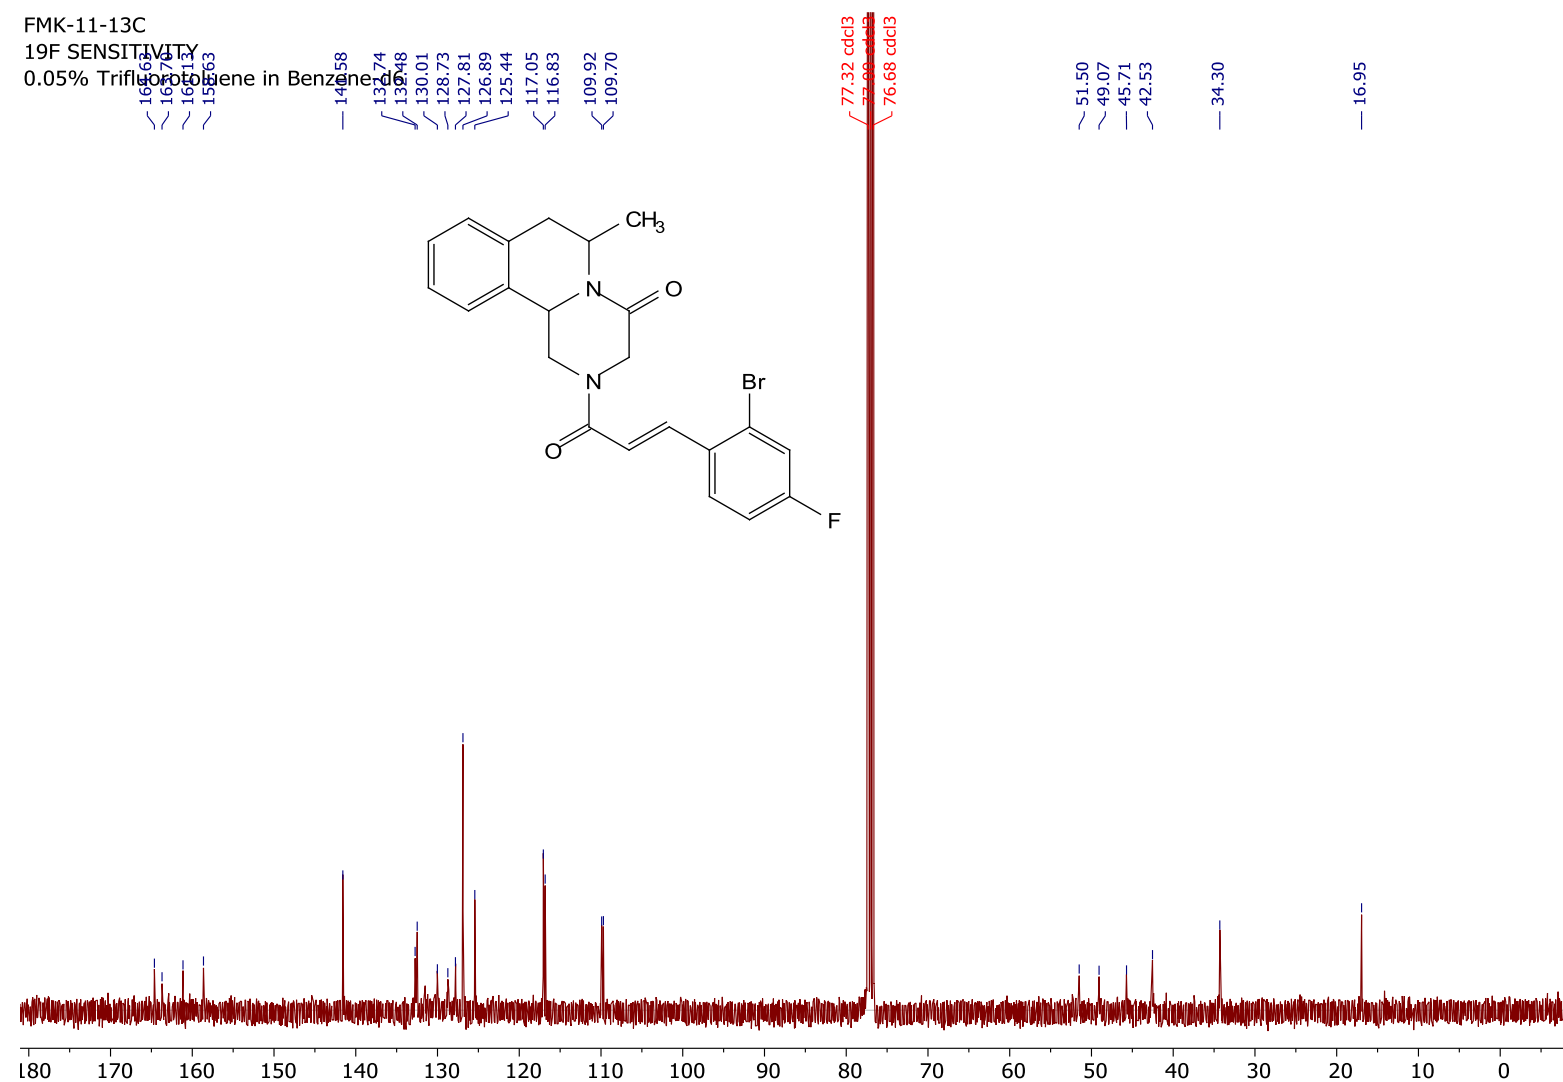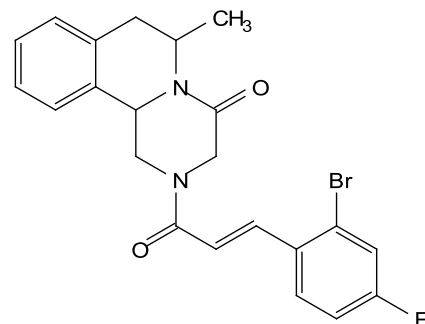<sup>13</sup>C-NMR spectrum of 2-[(2*E*)-3-(2-Bromo-4-fluorophenyl)prop-2-enoyl]-6-methyl-1,2,3,6,7,11b-hexahydro-4H-pyrazino[2,1-a]isoquinolin-4-one

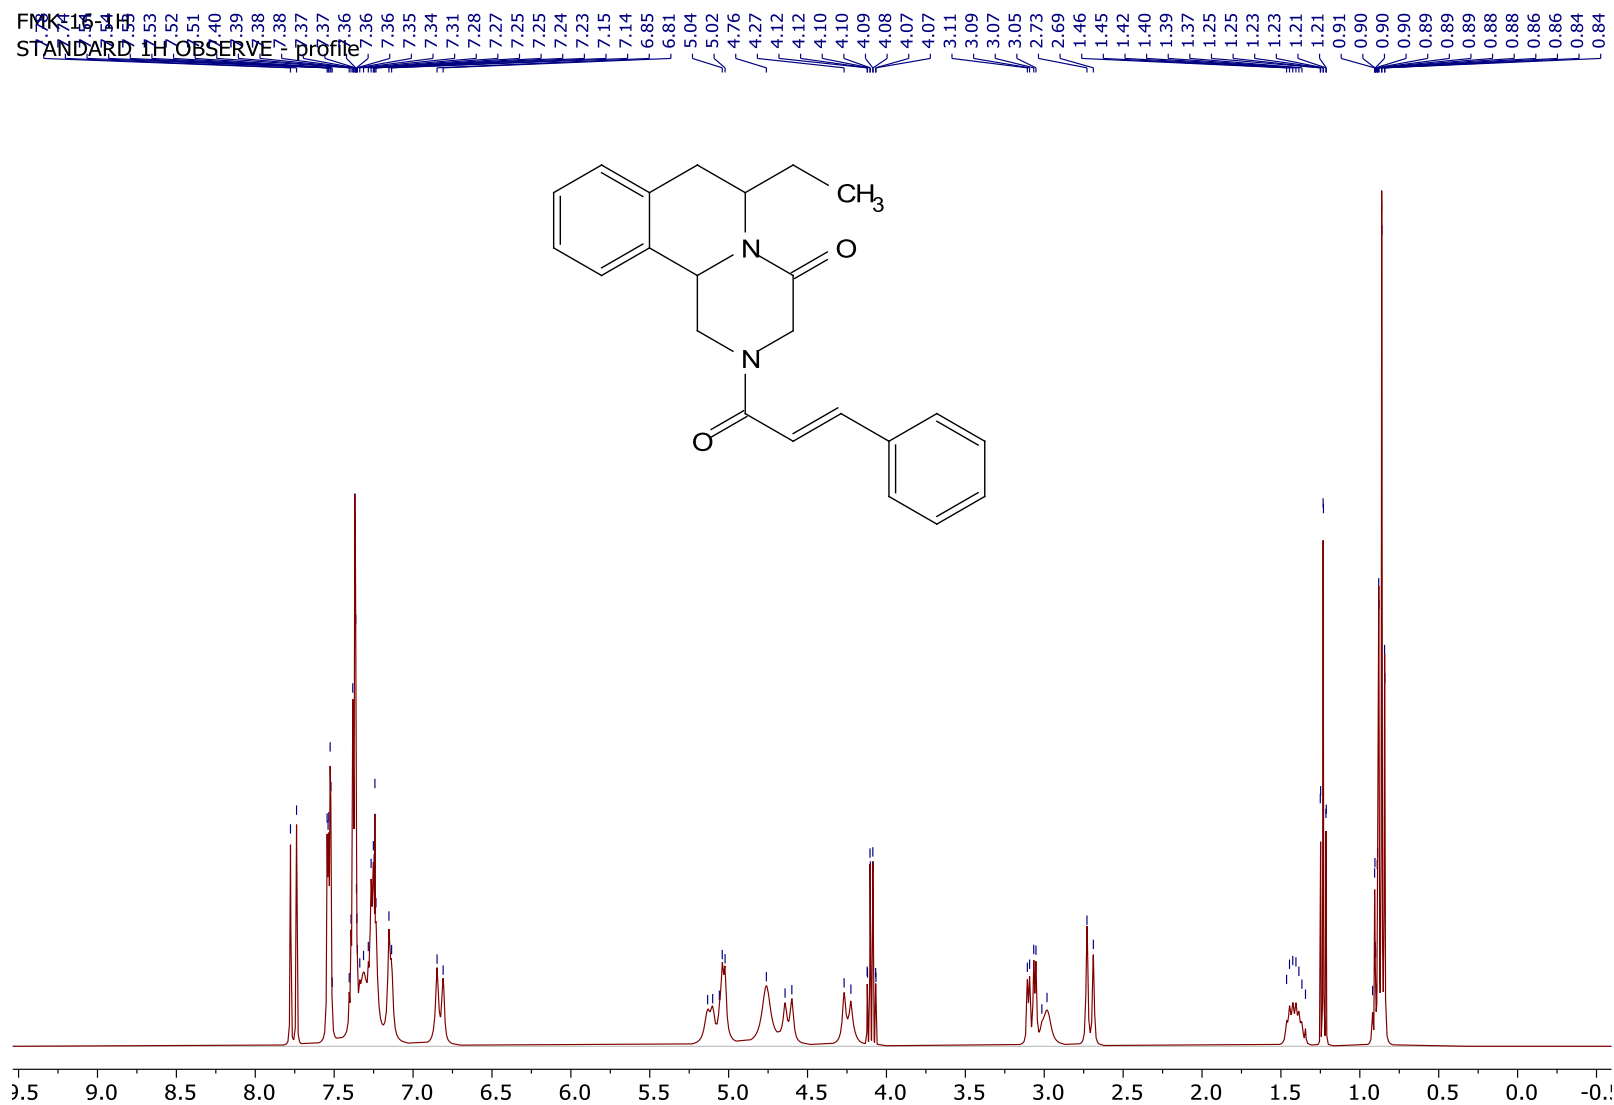

<sup>1</sup>H-NMR spectrum of 6-Ethyl-2-[(2E)-3-phenylprop-2-enoyl]-1,2,3,6,7,11b-hexahydro-4H-pyrazino[2,1-a]isoquinolin-4-one **34**



FMK-27-H  
 19F SENSITIVITY  
 0.05% Trifluorotoluene in Benzene-d6

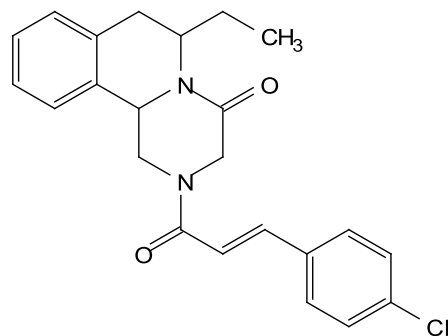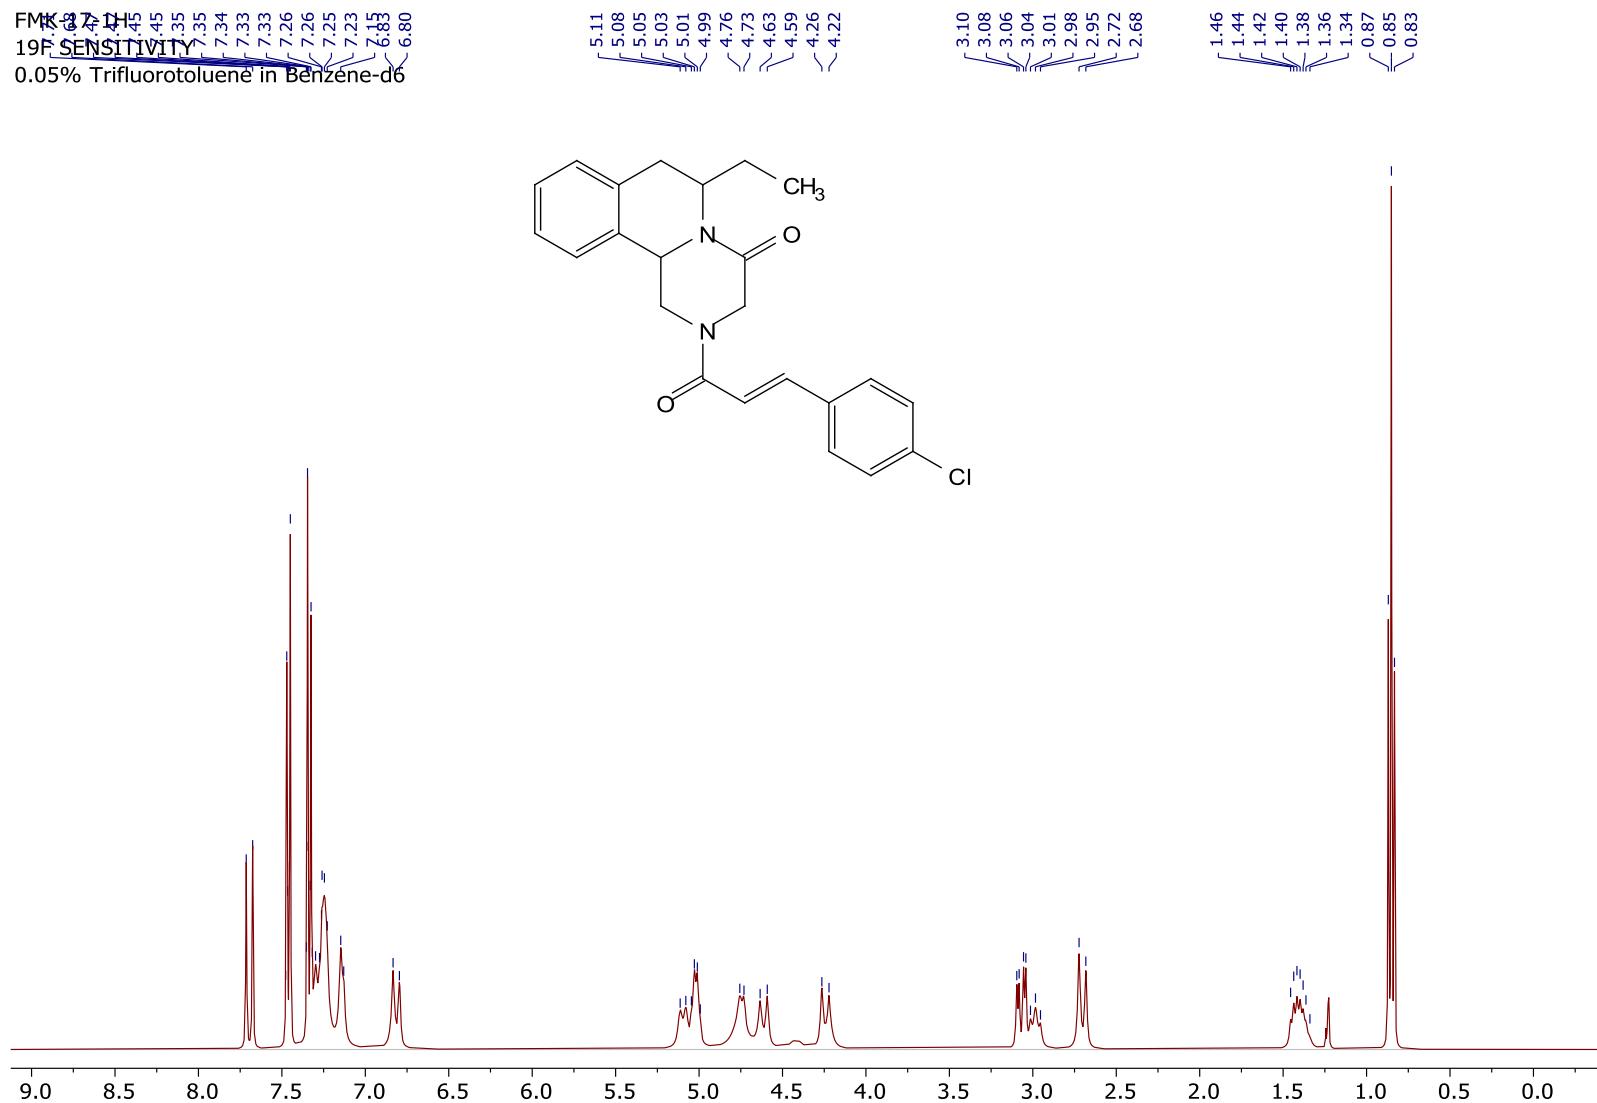

$^1\text{H}$ -NMR spectrum of 2-[(2E)-3-(4-Chloro-phenyl)-acryloyl]-6-ethyl-1,2,3,6,7,11b-hexahydro-pyrazino[2,1-a]isoquinolin-4-one **35**

FMK-17-13C

STANDARD PROTON PARAMETERS

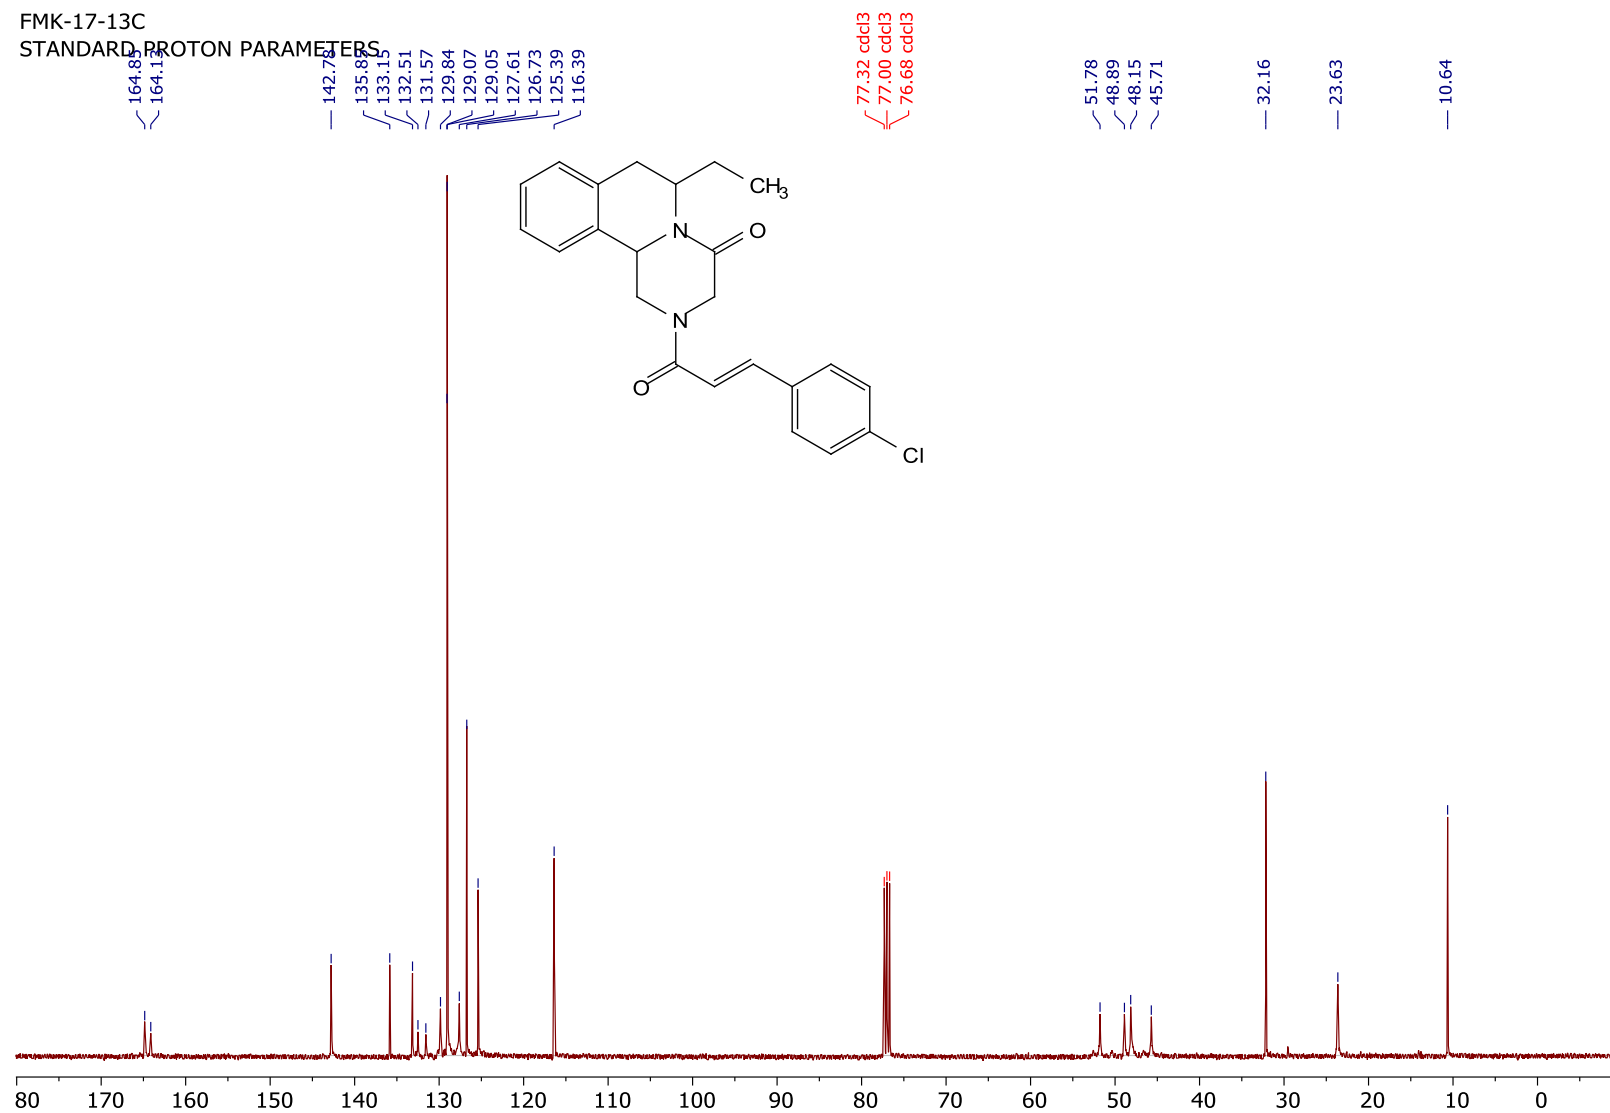 $^{13}\text{C}$ -NMR spectrum of 2-[(2E)-3-(4-Chloro-phenyl)-acryloyl]-6-ethyl-1,2,3,6,7,11b-hexahydro-pyrazino[2,1-a]isoquinolin-4-one **35**



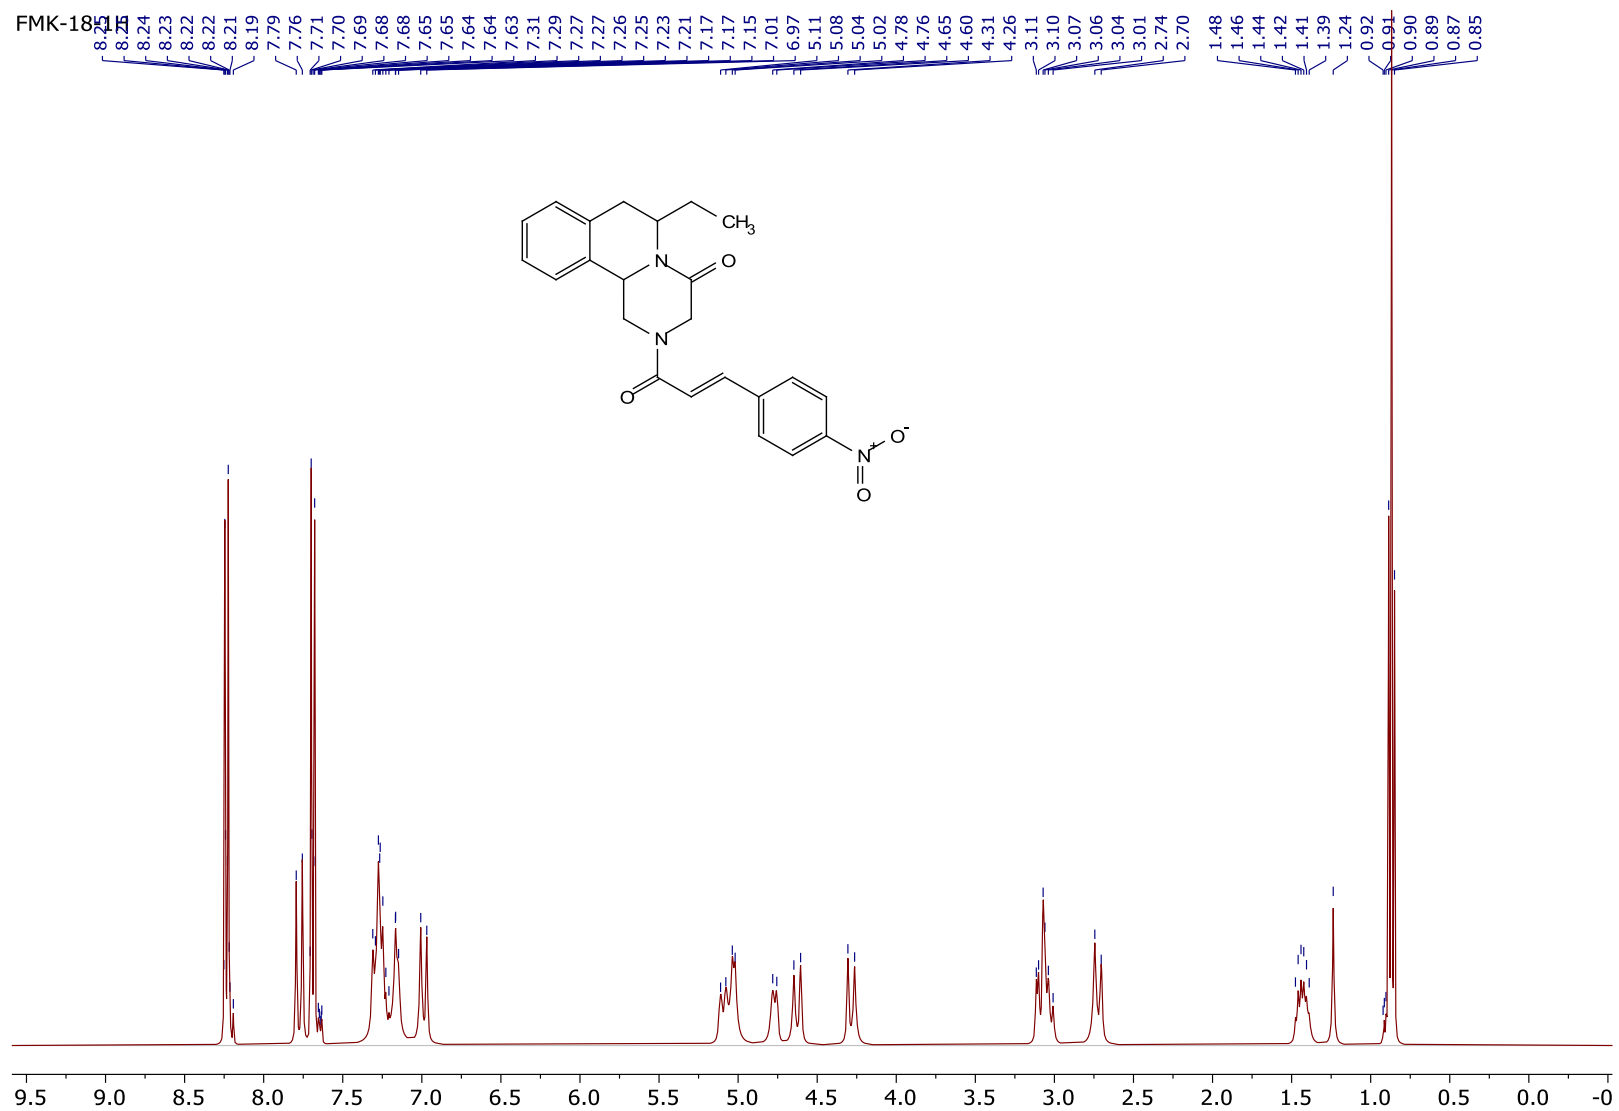

<sup>1</sup>H-NMR spectrum of 2-[(2*E*)-3-(4-Nitro-phenyl)-acryloyl]-6-ethyl-1,2,3,6,7,11b-hexahydro-pyrazino[2,1-a]isoquinolin-4-one **36**

FMK-18-13C  
19F SENSITIVITY  
0.05% Trifluorotoluene in Benzene-d6

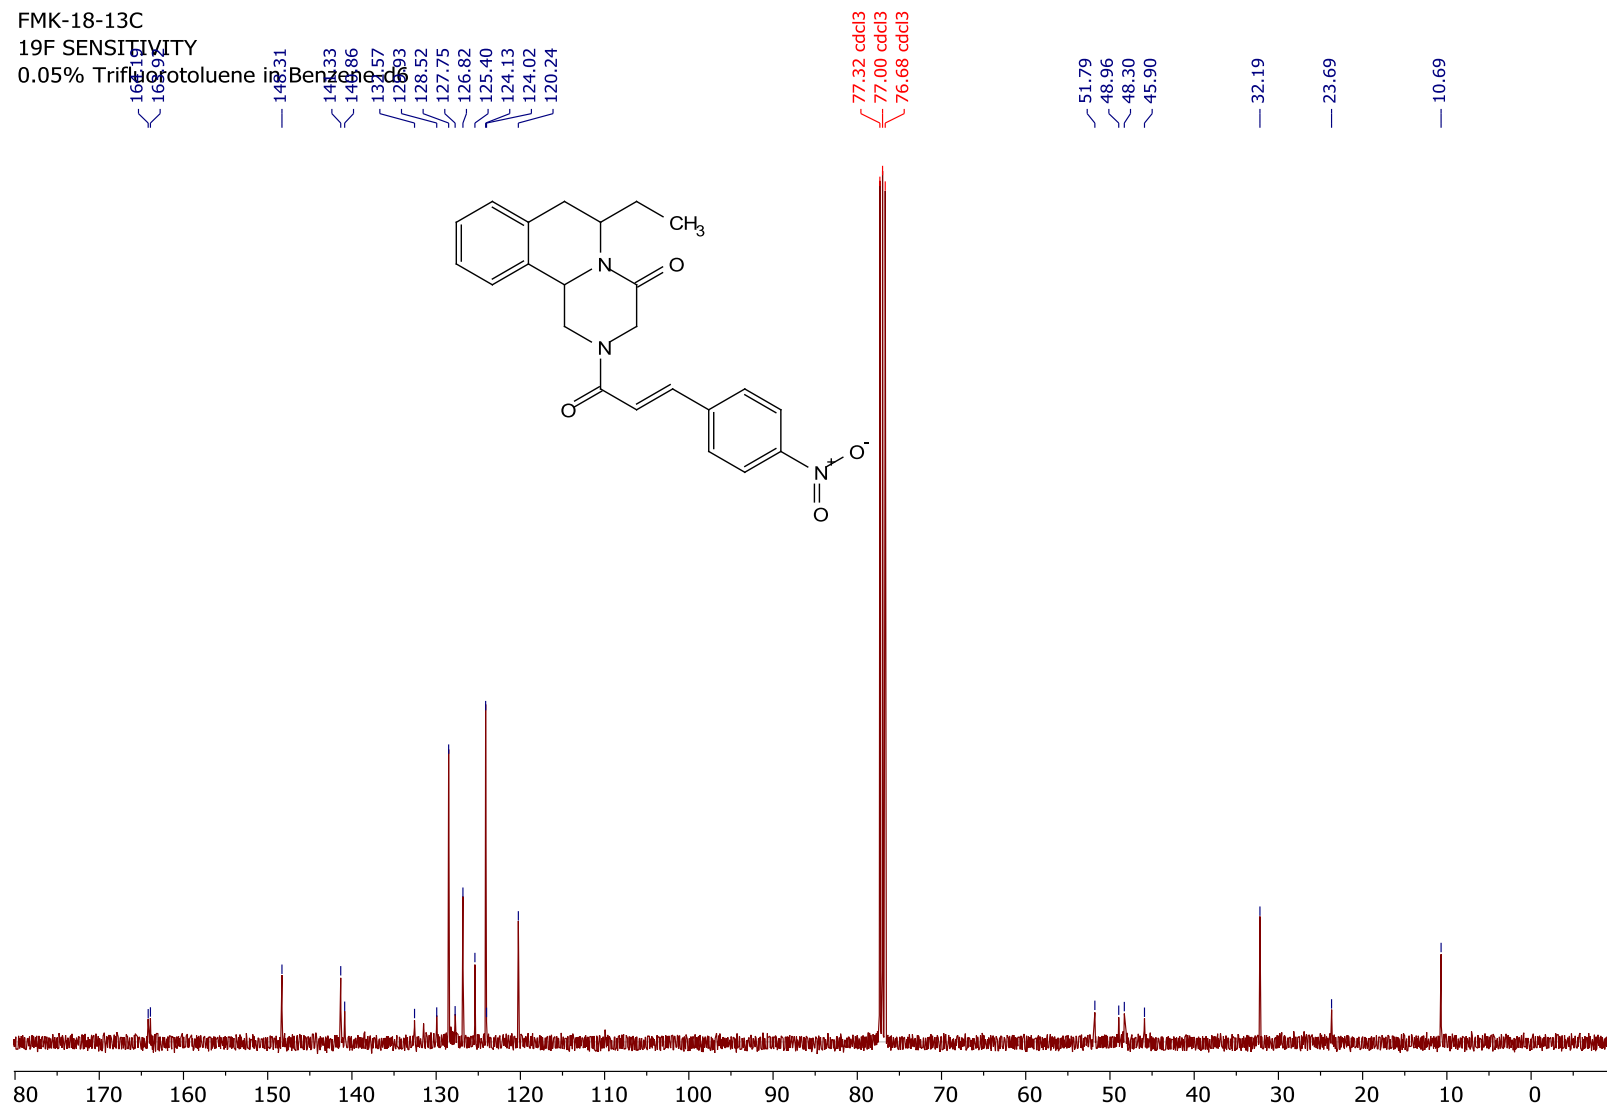

<sup>13</sup>C-NMR spectrum of 2-[(2E)-3-(4-Nitro-phenyl)-acryloyl]-6-ethyl-1,2,3,6,7,11b-hexahydro-pyrazino[2,1-a]isoquinolin-4-one **36**

FMK-2081H  
 19F SENSITIVITY  
 0.05% Trifluorotoluene in Benzene-d6

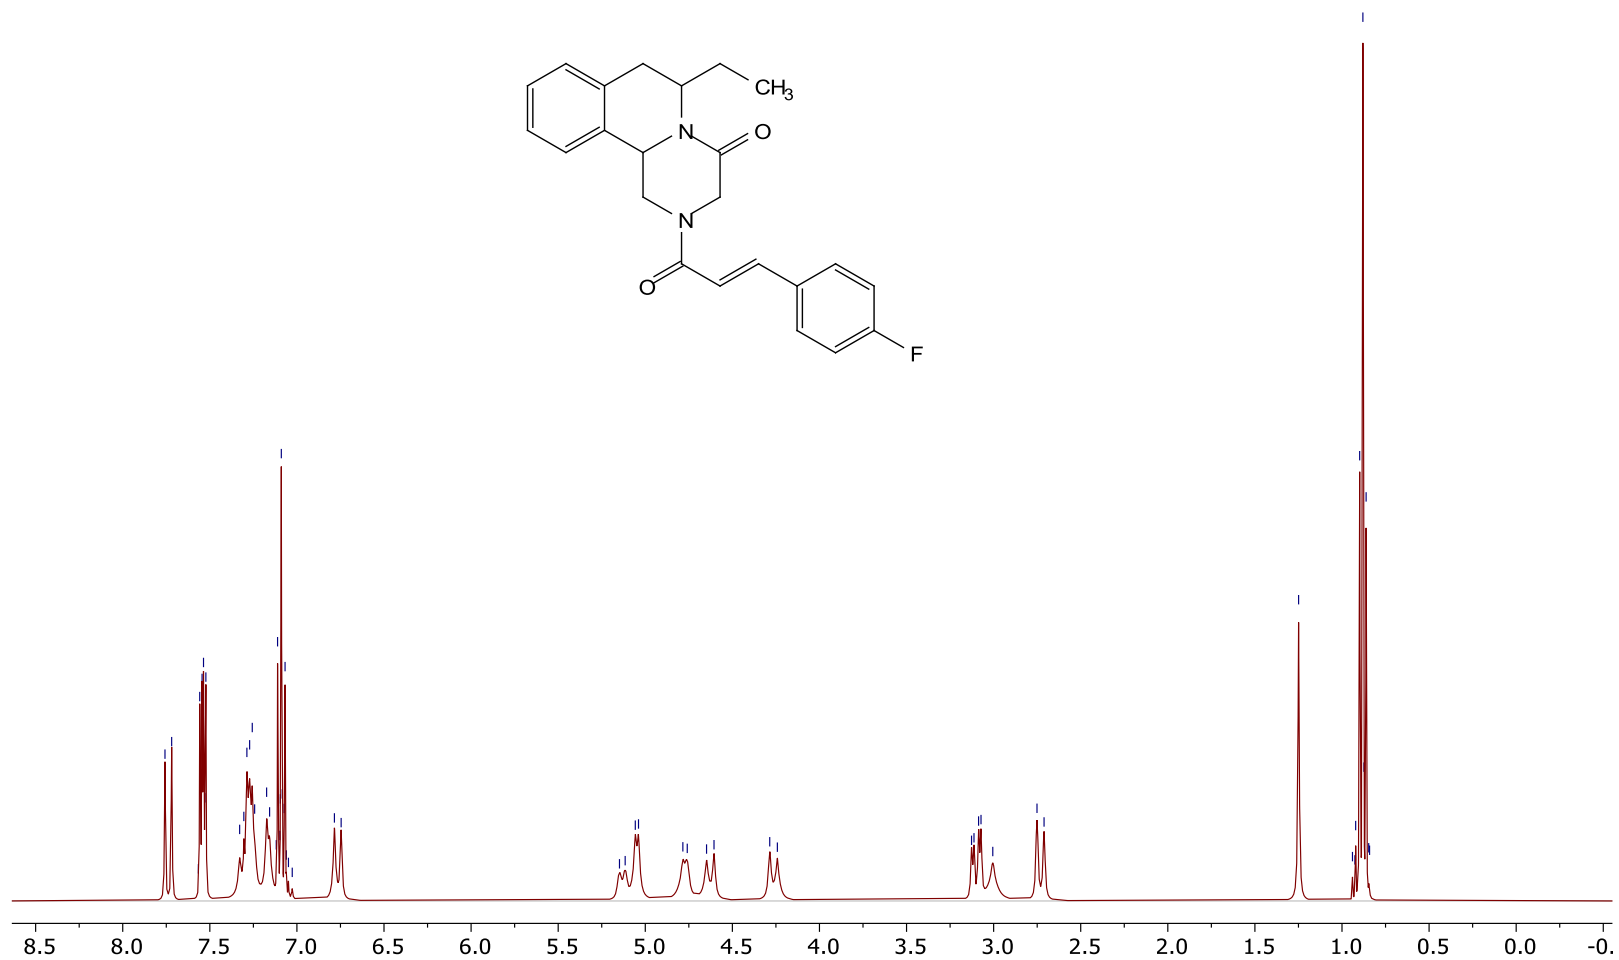

<sup>1</sup>H-NMR spectrum of 2-[(2E)-3-(4-Fluoro-phenyl)-acryloyl]-6-ethyl-1,2,3,6,7,11b-hexahydro-pyrazino[2,1-a]isoquinolin-4-one **37**

FMK-20-13C

STANDARD PROTON PARAMETERS

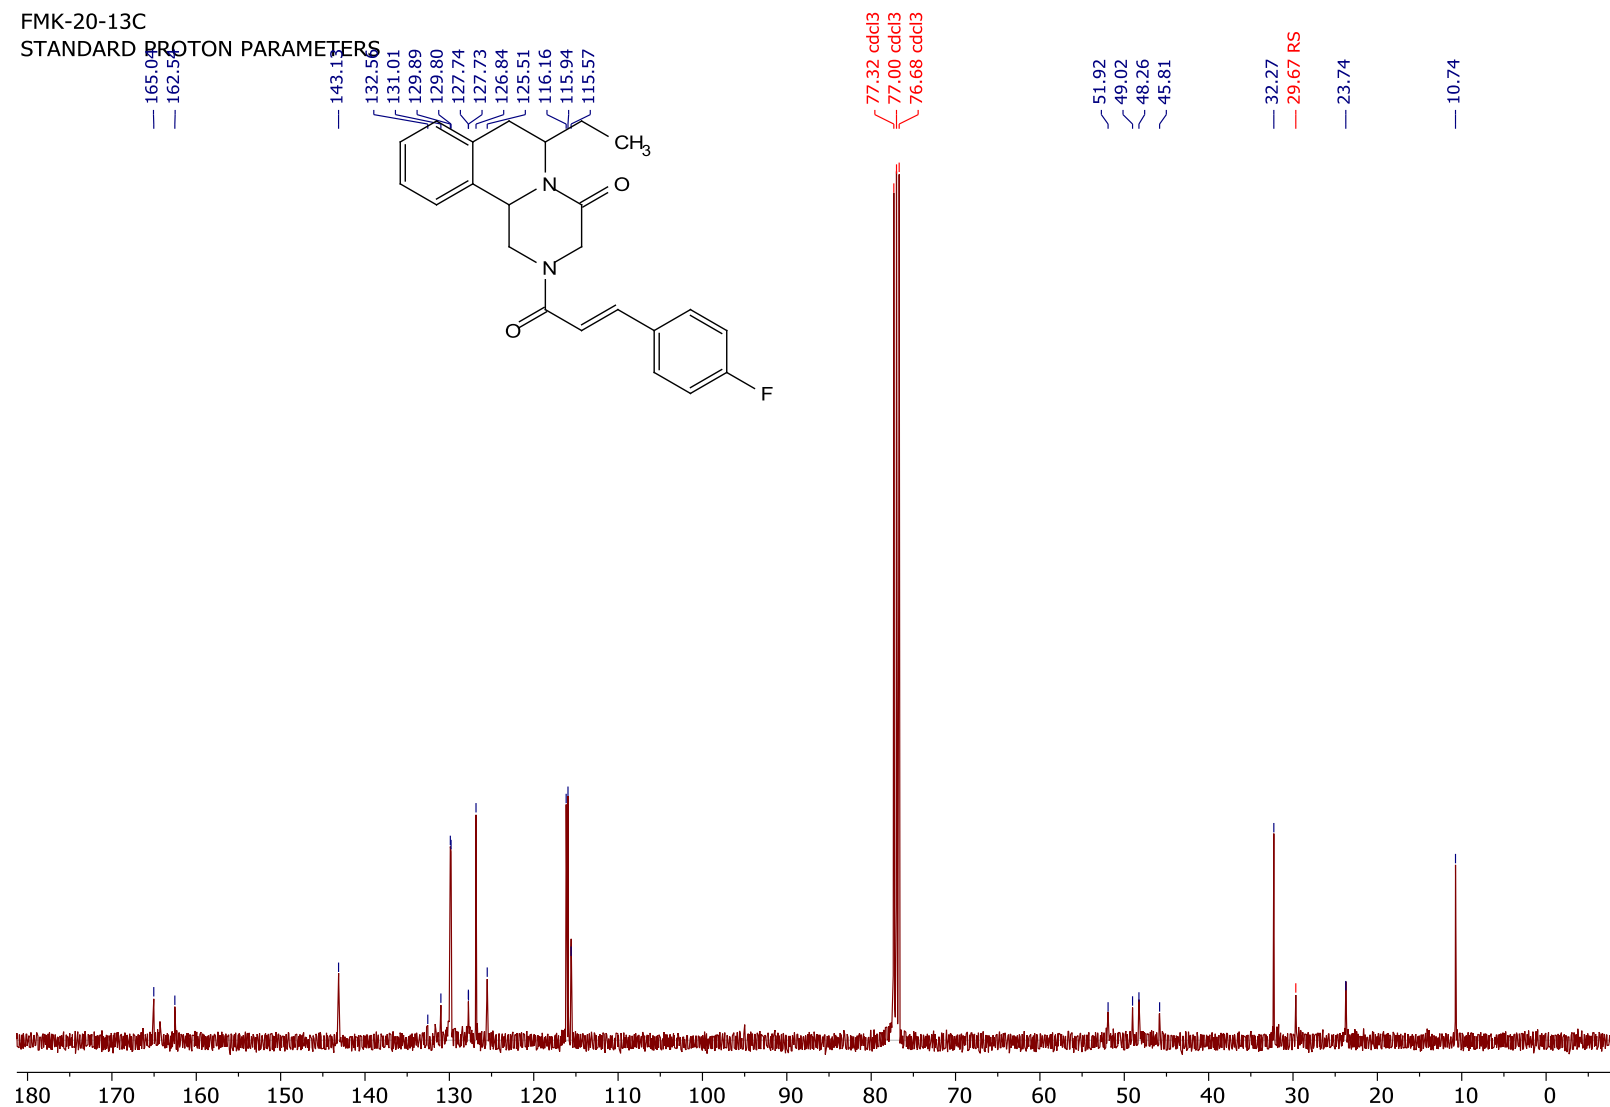 $^{13}\text{C}$ -NMR spectrum of 2-[(2E)-3-(4-Fluoro-phenyl)-acryloyl]- 6-ethyl-1,2,3,6,7,11b-hexahydro-pyrazino[2,1-a]isoquinolin-4-one **37**

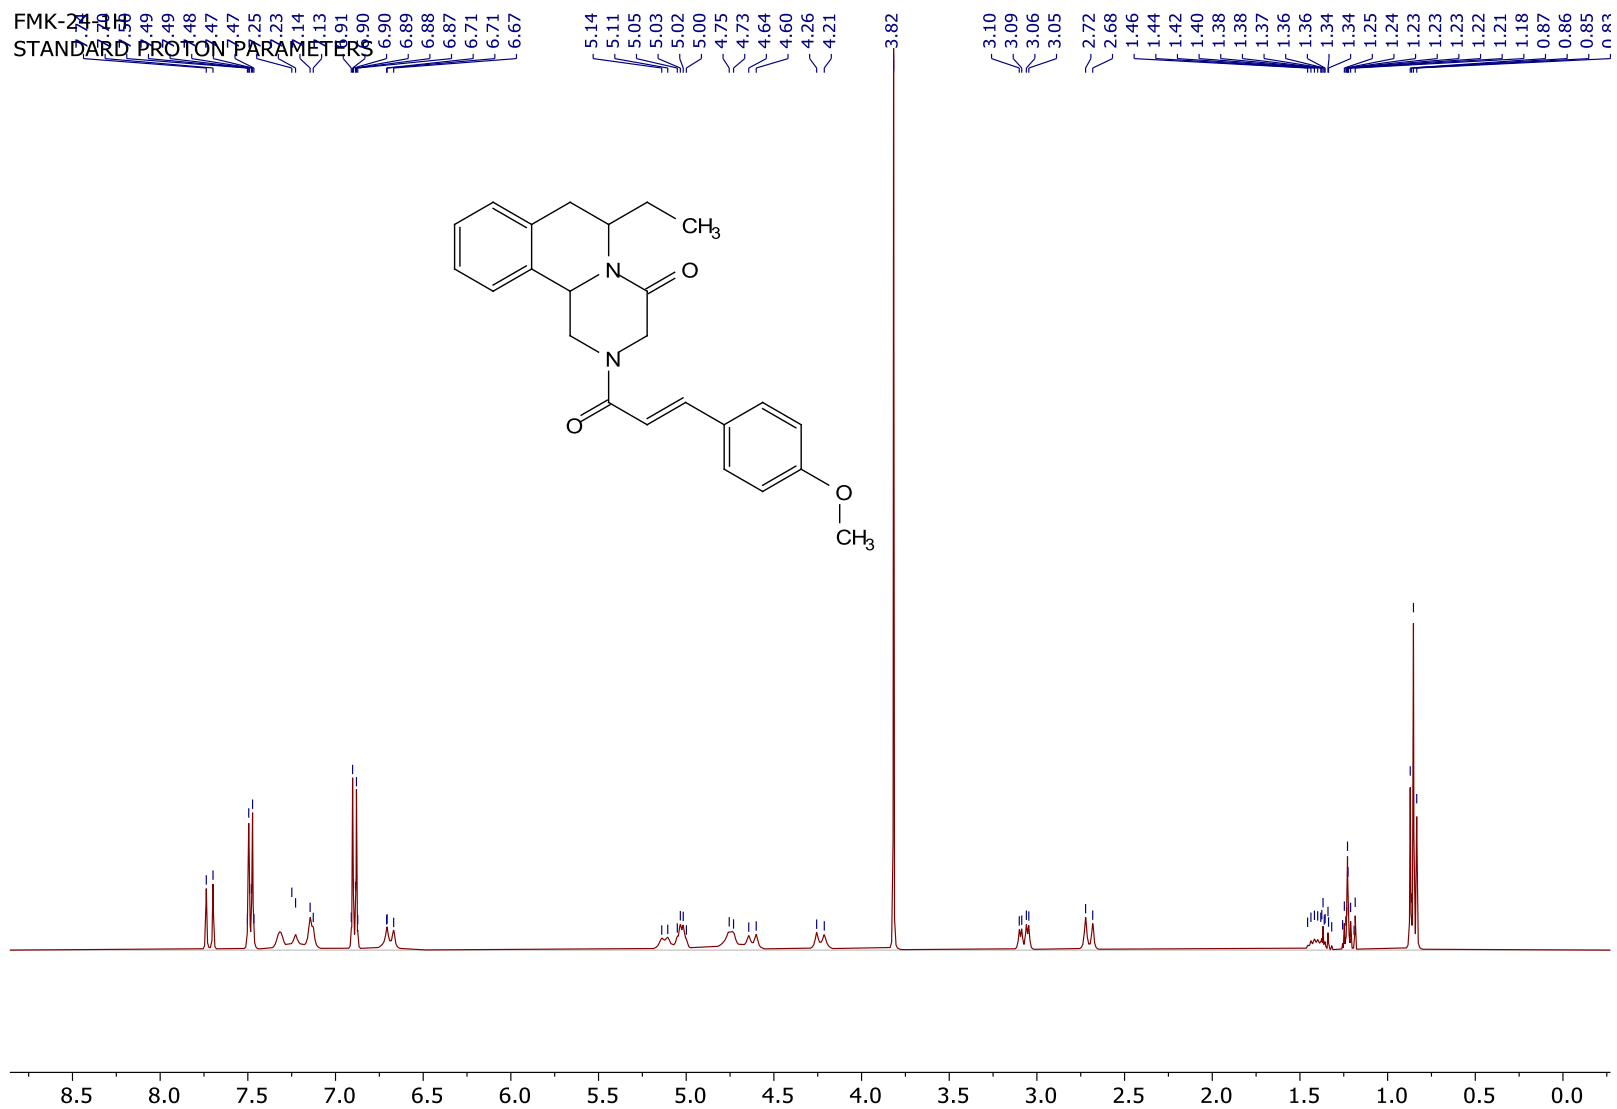

<sup>1</sup>H-NMR spectrum of 2-[(2E)-3-(4-Methoxy-phenyl)-acryloyl]-6-ethyl-1,2,3,6,7,11b-hexahydro-pyrazino[2,1-a]isoquinolin-4-one **38**

FMK-24-13C

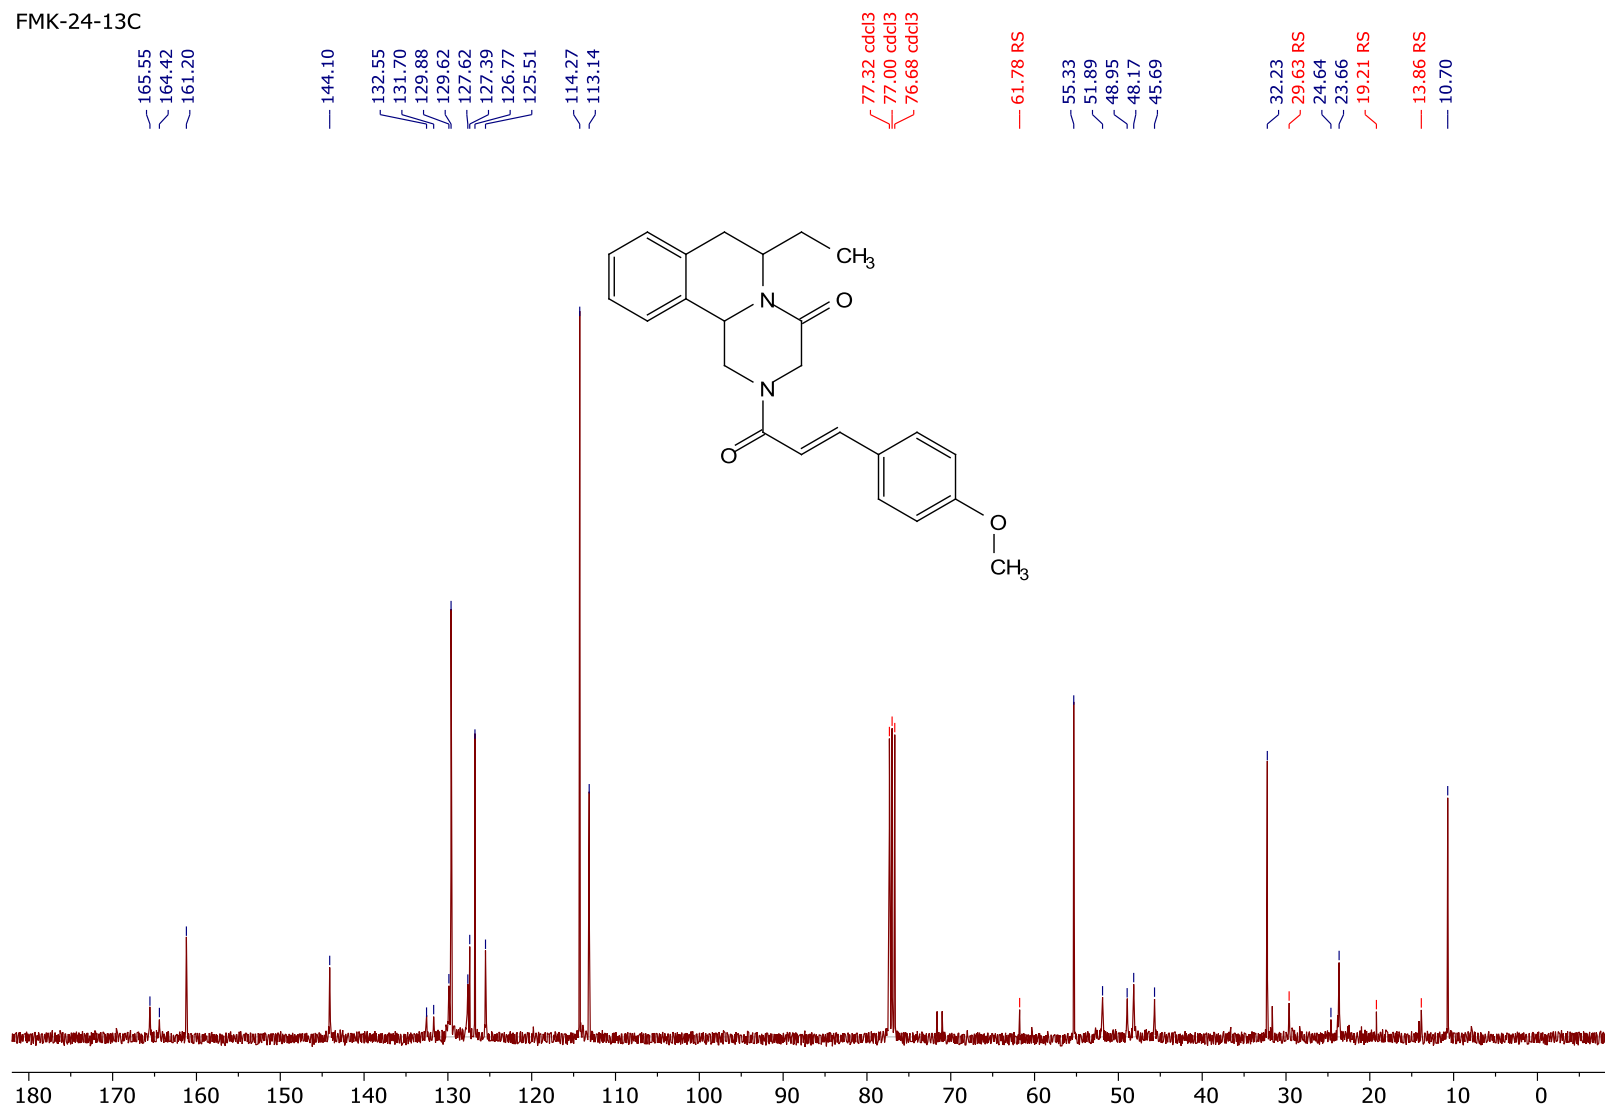<sup>13</sup>C-NMR spectrum of 2-[(2E)-3-(4-Methoxy-phenyl)-acryloyl]-6-ethyl-1,2,3,6,7,11b-hexahydro-pyrazino[2,1-a]isoquinolin-4-one **38**

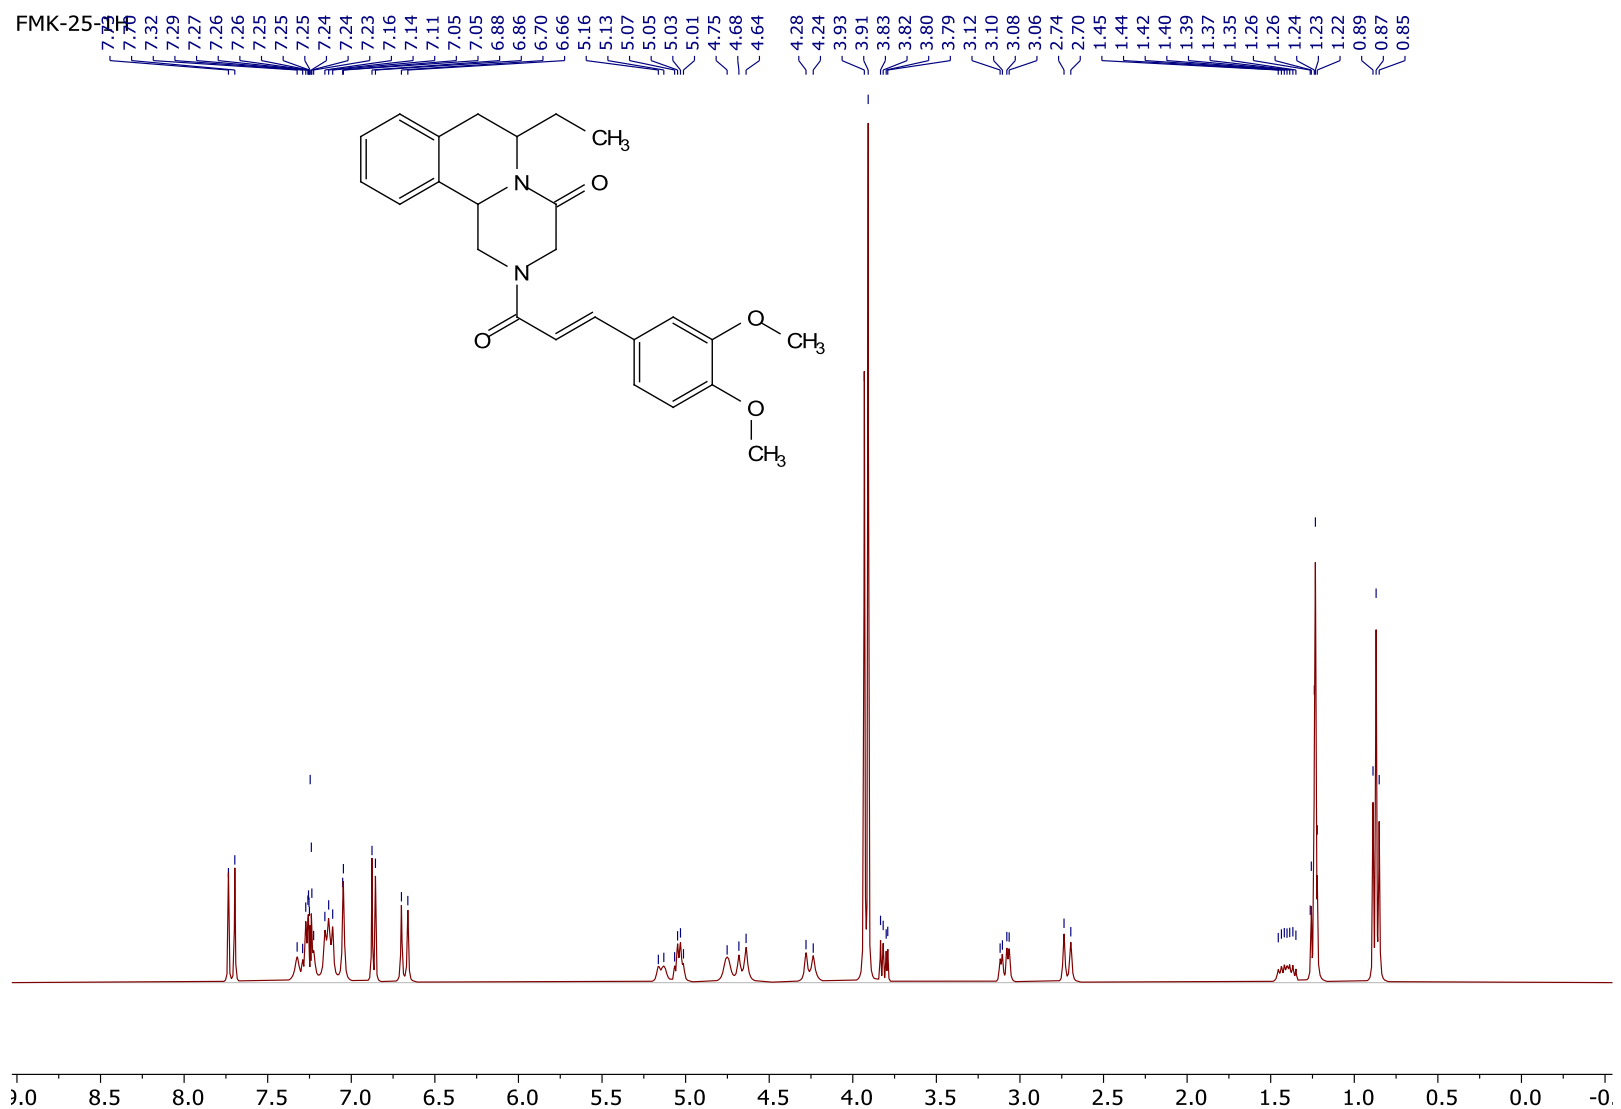

<sup>1</sup>H-NMR spectrum of 2-[(2E)-3-(3,4-Dimethoxy-phenyl)-acryloyl]-6-ethyl-1,2,3,6,7,11b-hexahydro-pyrazino[2,1-a]isoquinolin-4-one **39**

FMK-25-13C

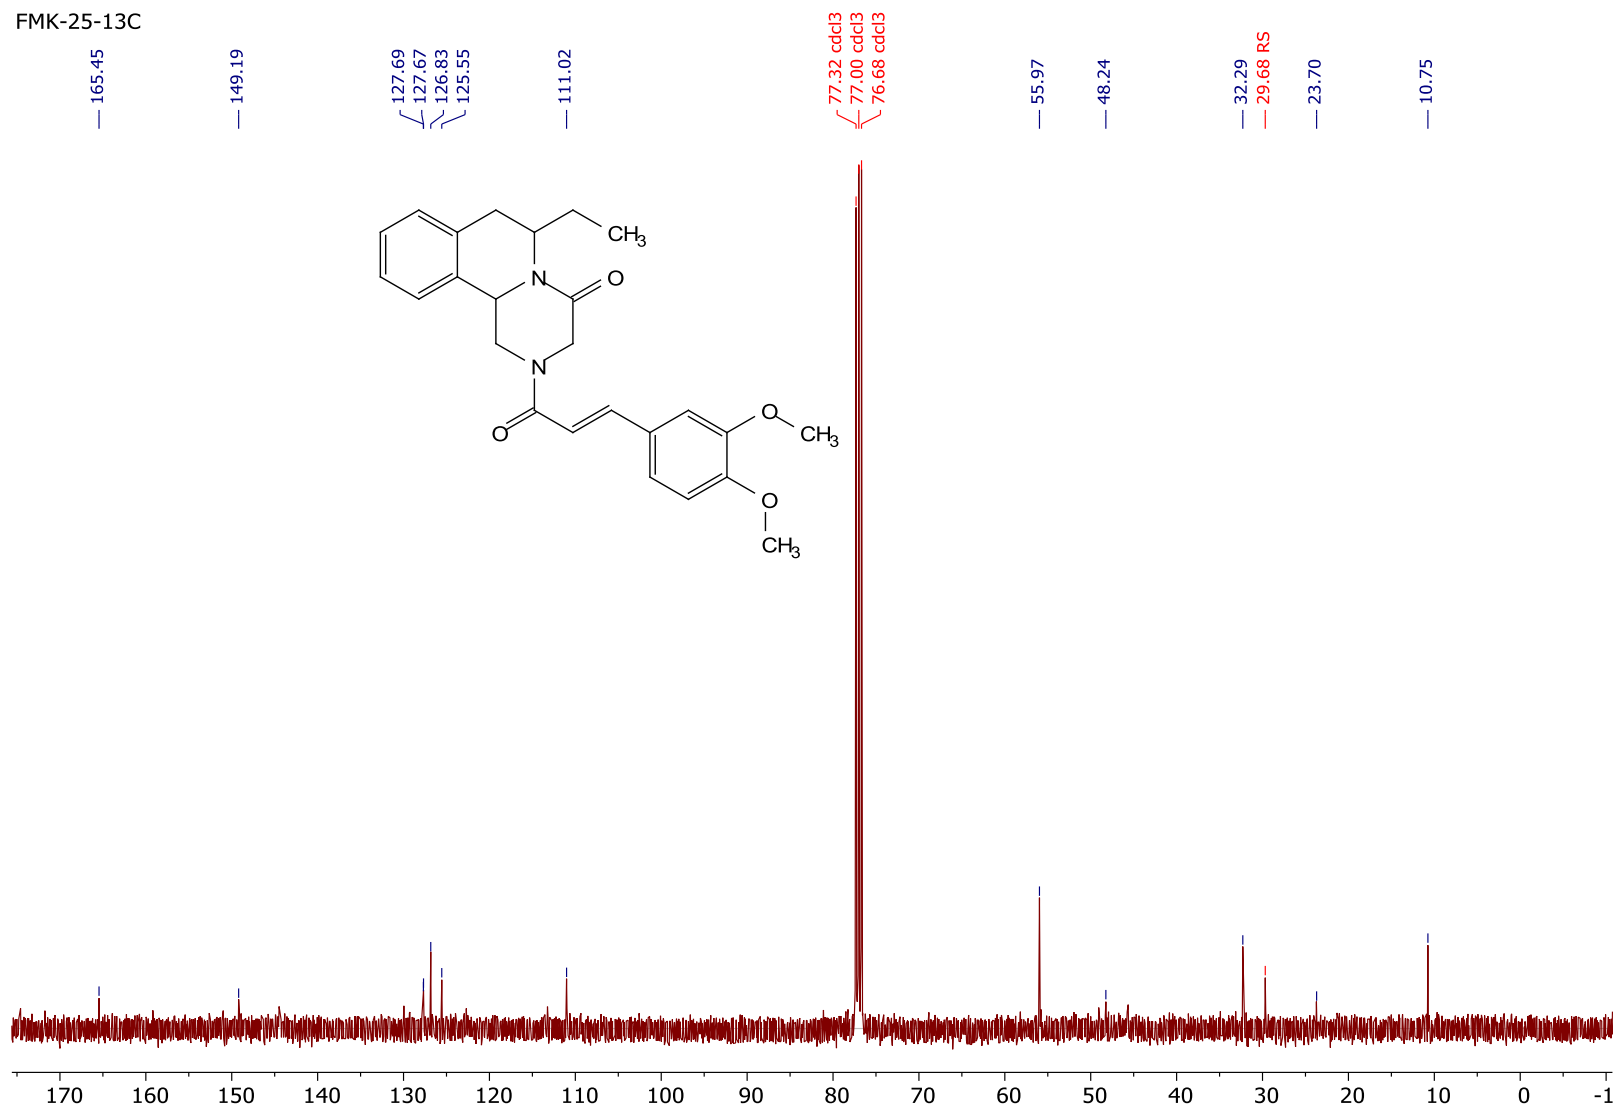

<sup>13</sup>C-NMR spectrum of 2-[(2E)-3-(3,4-Dimethoxy-phenyl)-acryloyl]-6-ethyl-1,2,3,6,7,11b-hexahydro-pyrazino[2,1-a]isoquinolin-4-one **39**



<sup>1</sup>H-NMR spectrum of 2-[(2*E*)-3-(2,4-Dimethoxy-phenyl)-acryloyl]-6-ethyl-1,2,3,6,7,11b-hexahydro-pyrazino[2,1-*a*]isoquinolin-4-one **40**

FMK-26-13C

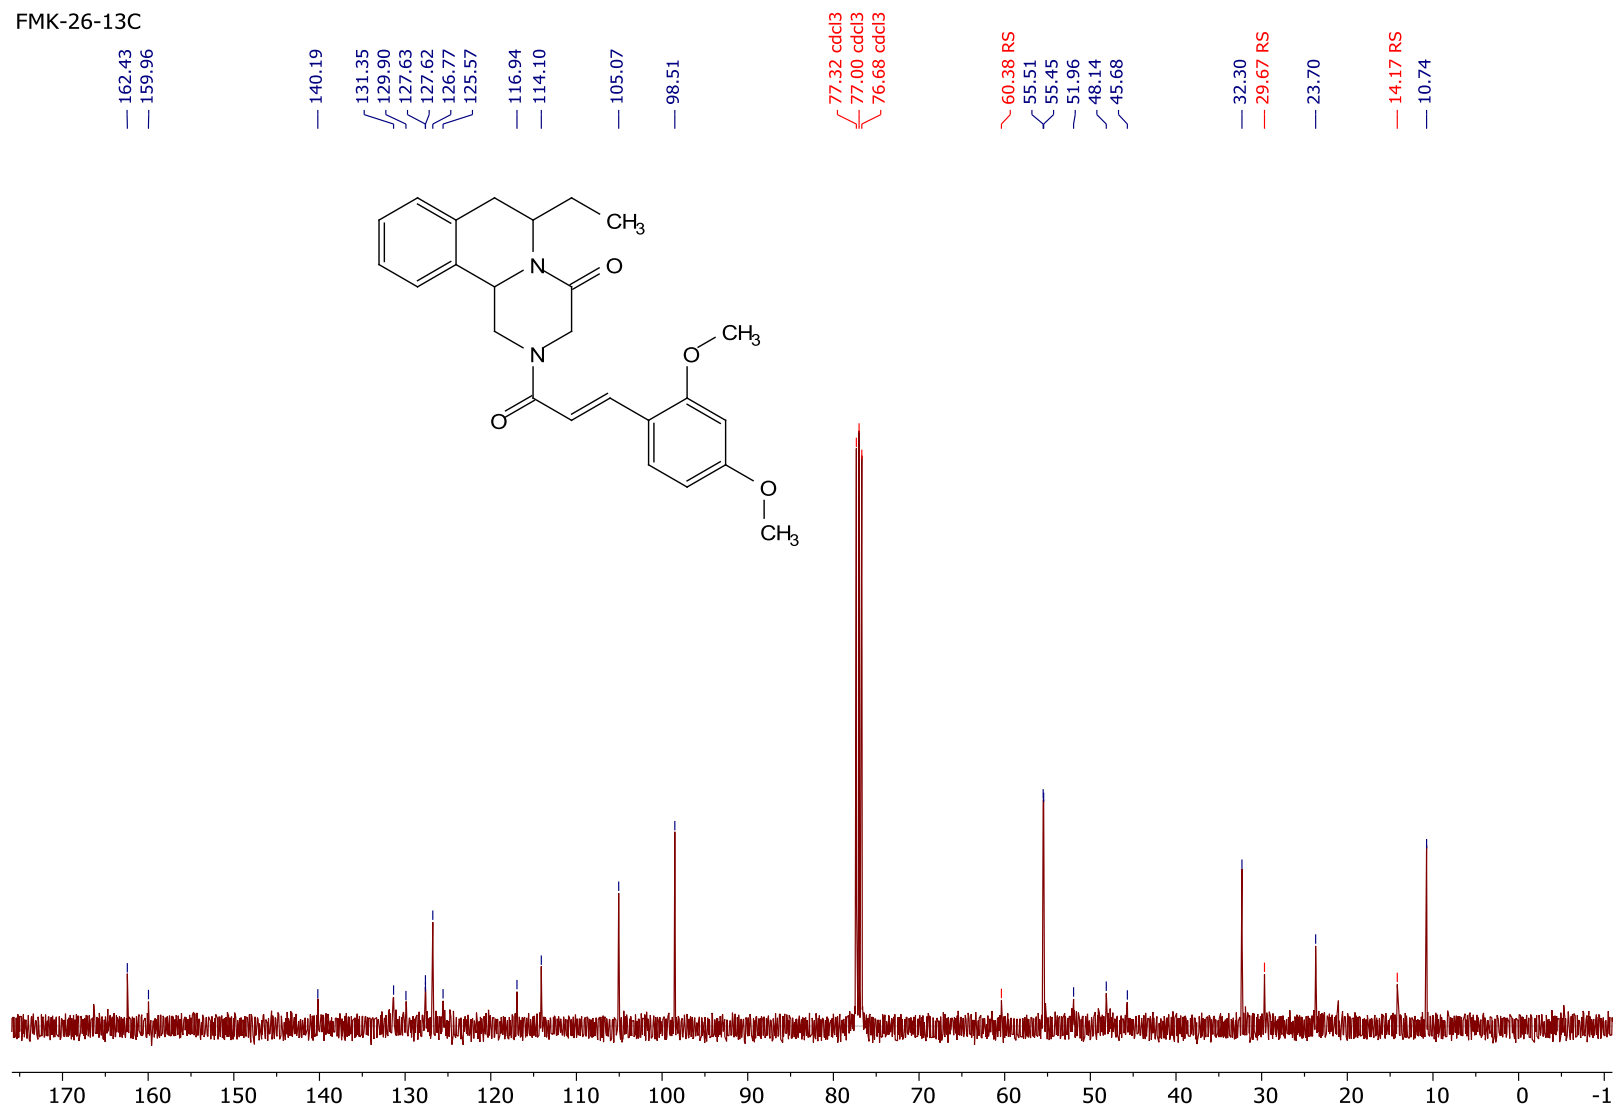

<sup>13</sup>C-NMR spectrum of 2-[(2E)-3-(2,4-Dimethoxy-phenyl)-acryloyl]-6-ethyl-1,2,3,6,7,11b-hexahydro-pyrazino[2,1-a]isoquinolin-4-one **40**

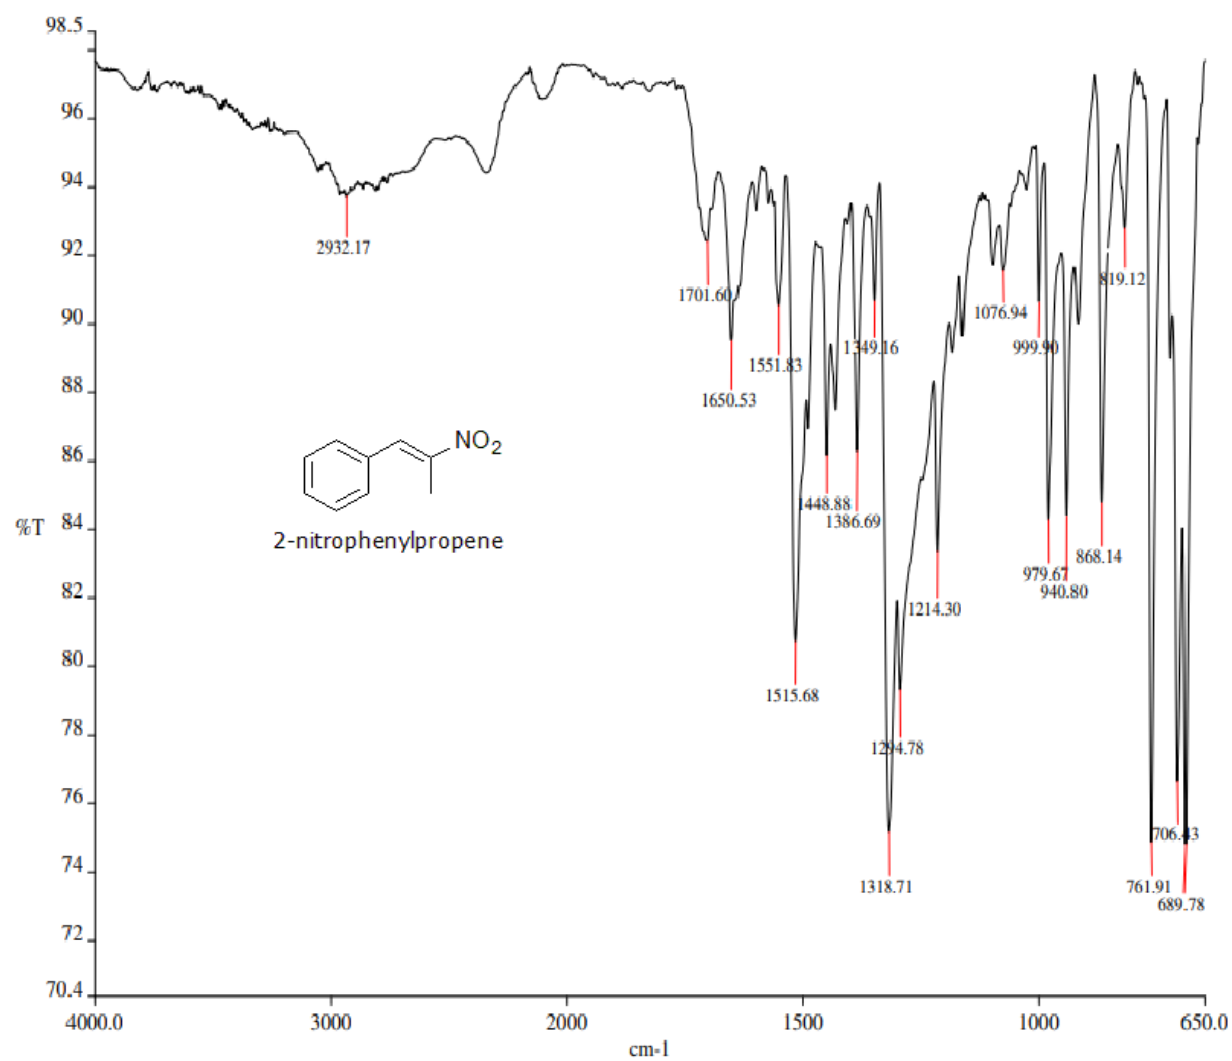FT-IR Spectrum of trans-2-nitrophenylpropene **16a**

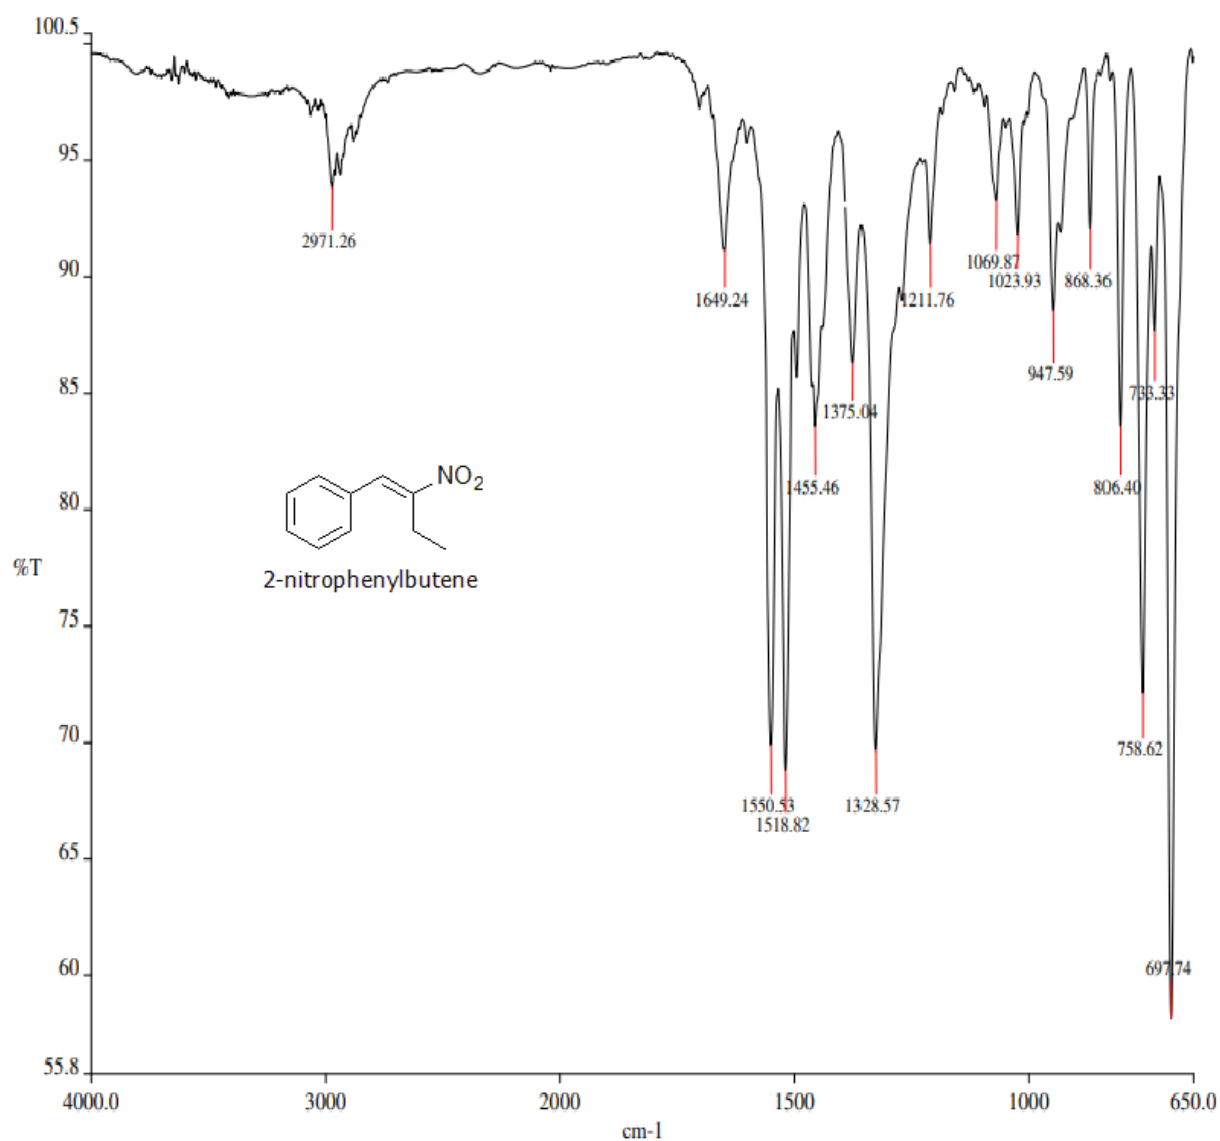

FT-IR Spectrum of trans-2-nitrophenylbutene **16b**

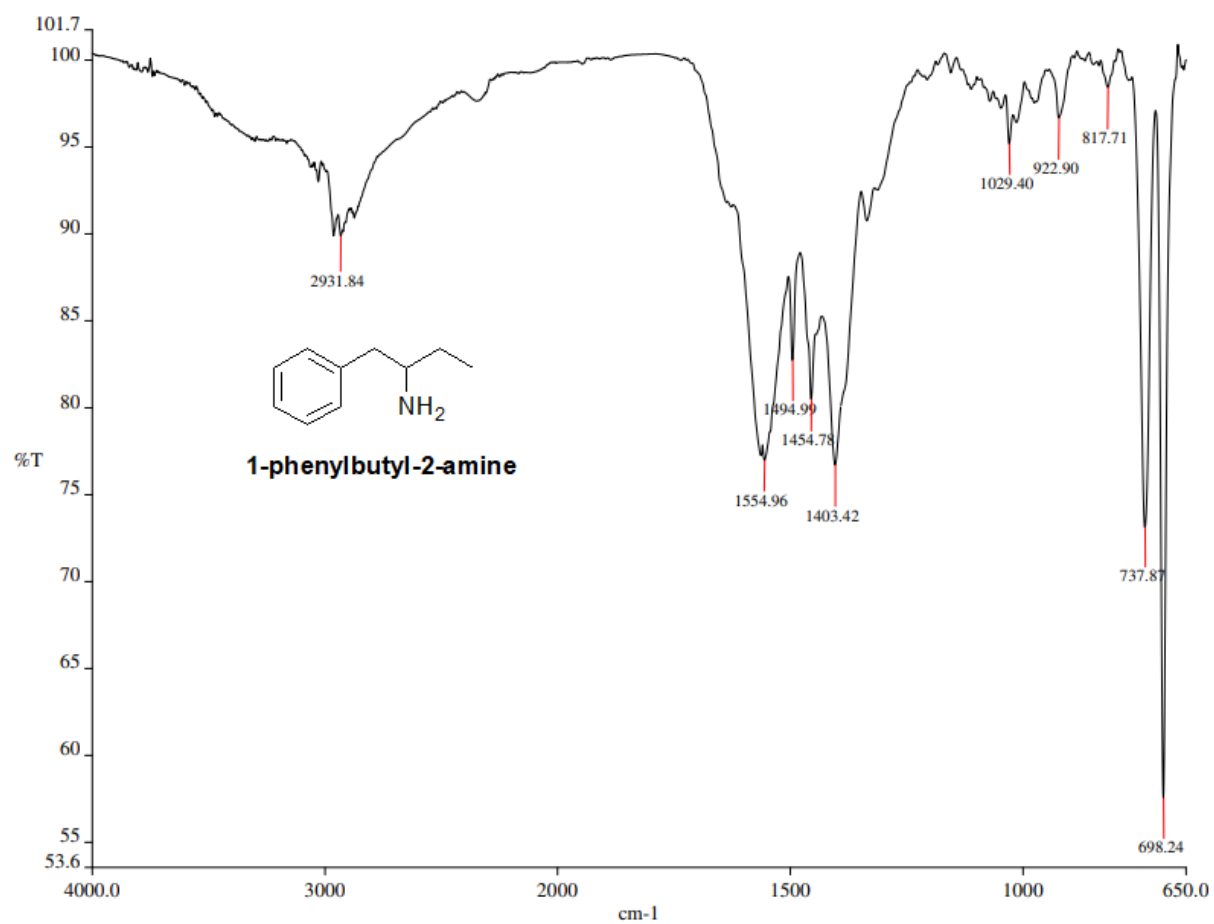FT-IR Spectrum of 1-phenylbutyl-2-amine **17b**

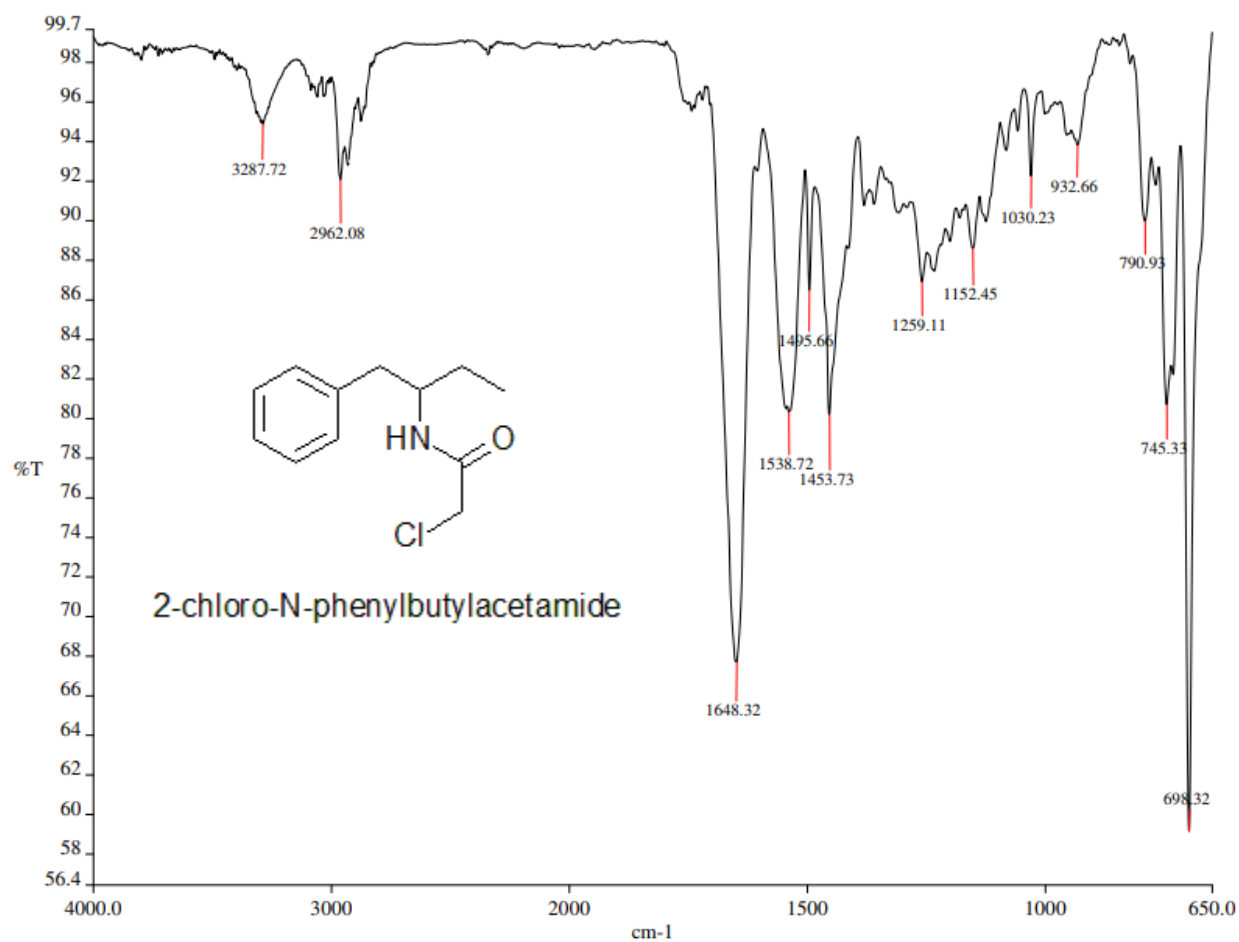

FT-IR Spectrum of 2-chloro-N-(1-phenylbutan-2-yl)acetamide **19bd**

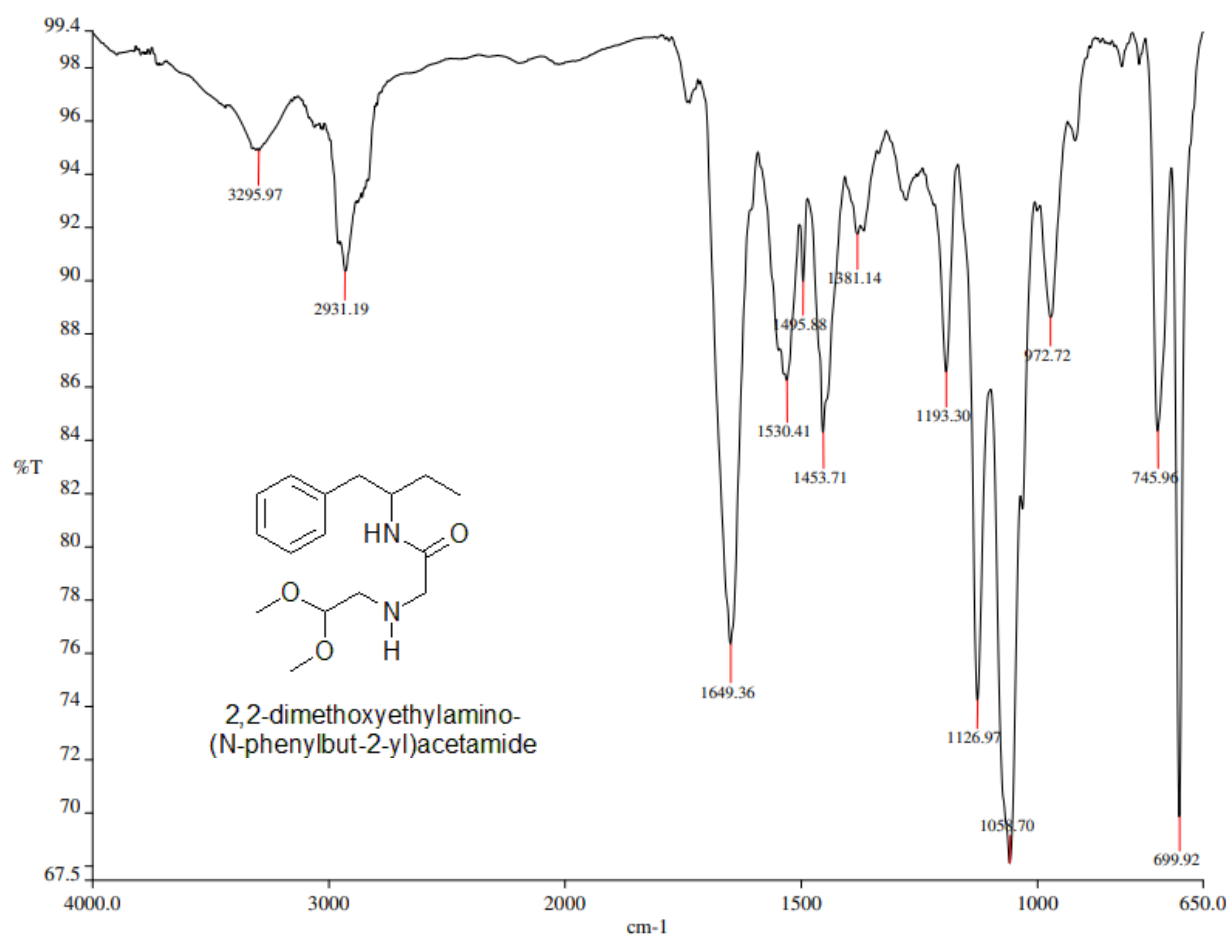

FT-IR Spectrum of 2,2-dimethoxyethylamino-N-(2-phenylbut-2-yl)acetamide **20b**

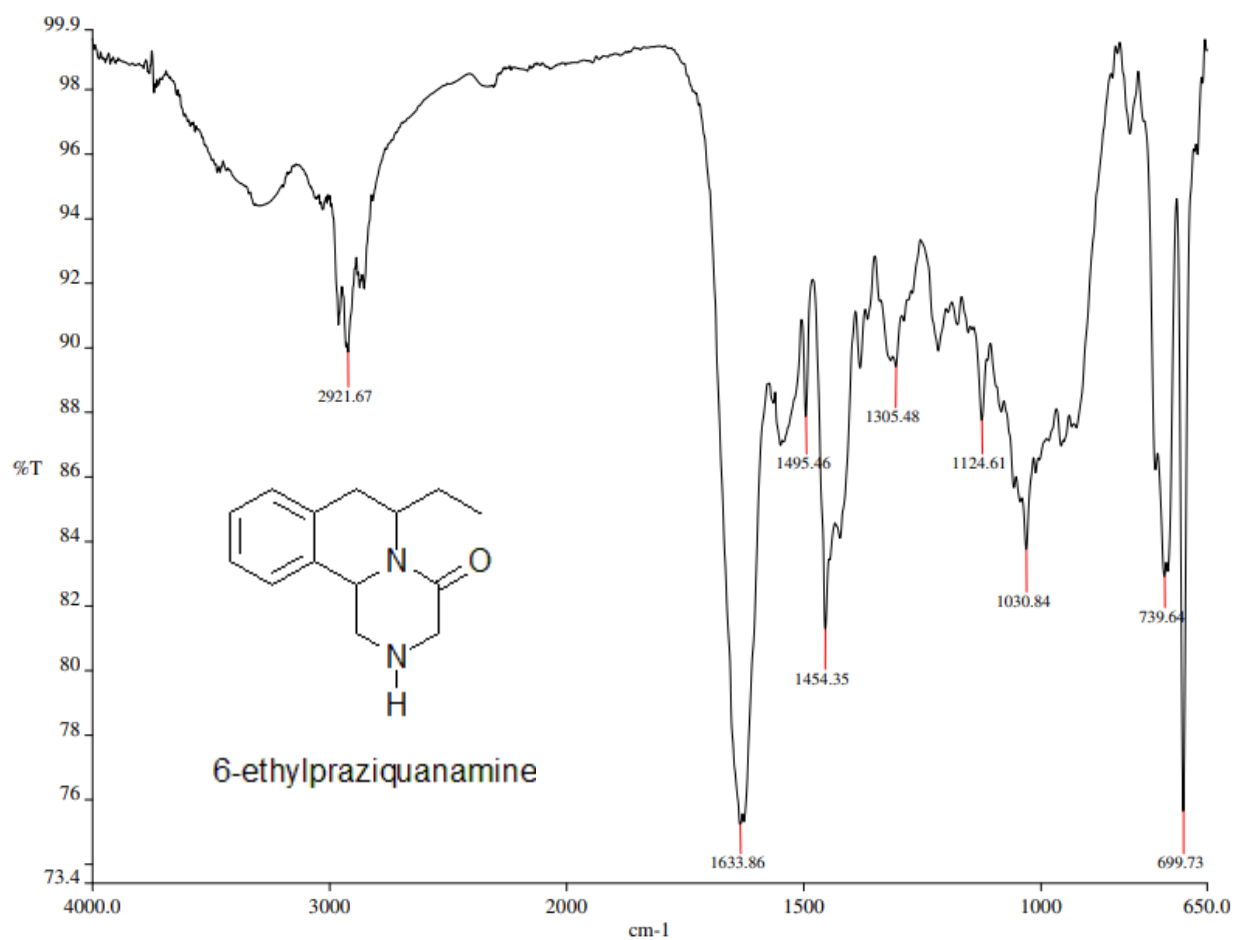FT-IR Spectrum of 6-Ethylpraziquanamine **21b**



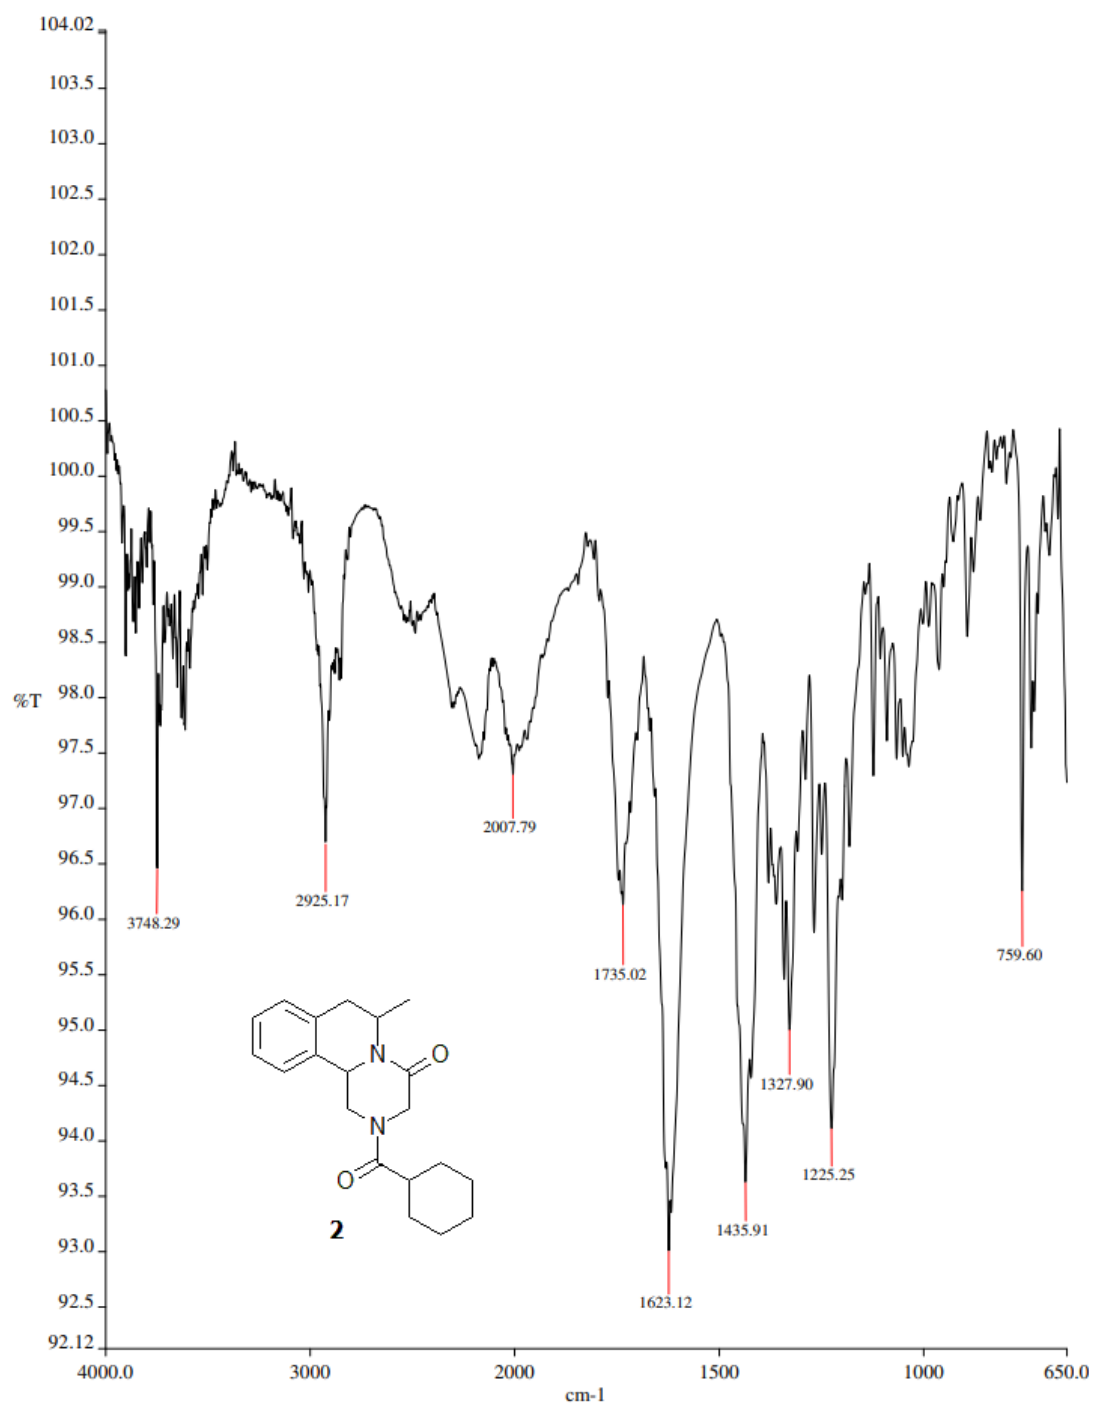

FT-IR spectrum of 2-(Cyclohexylcarbonyl)-6-methyl-1,2,3,6,7,11b-hexahydro-4H-pyrazino[2,1-a]isoquinolin-4-one, 6-methylpraziquantel **22**

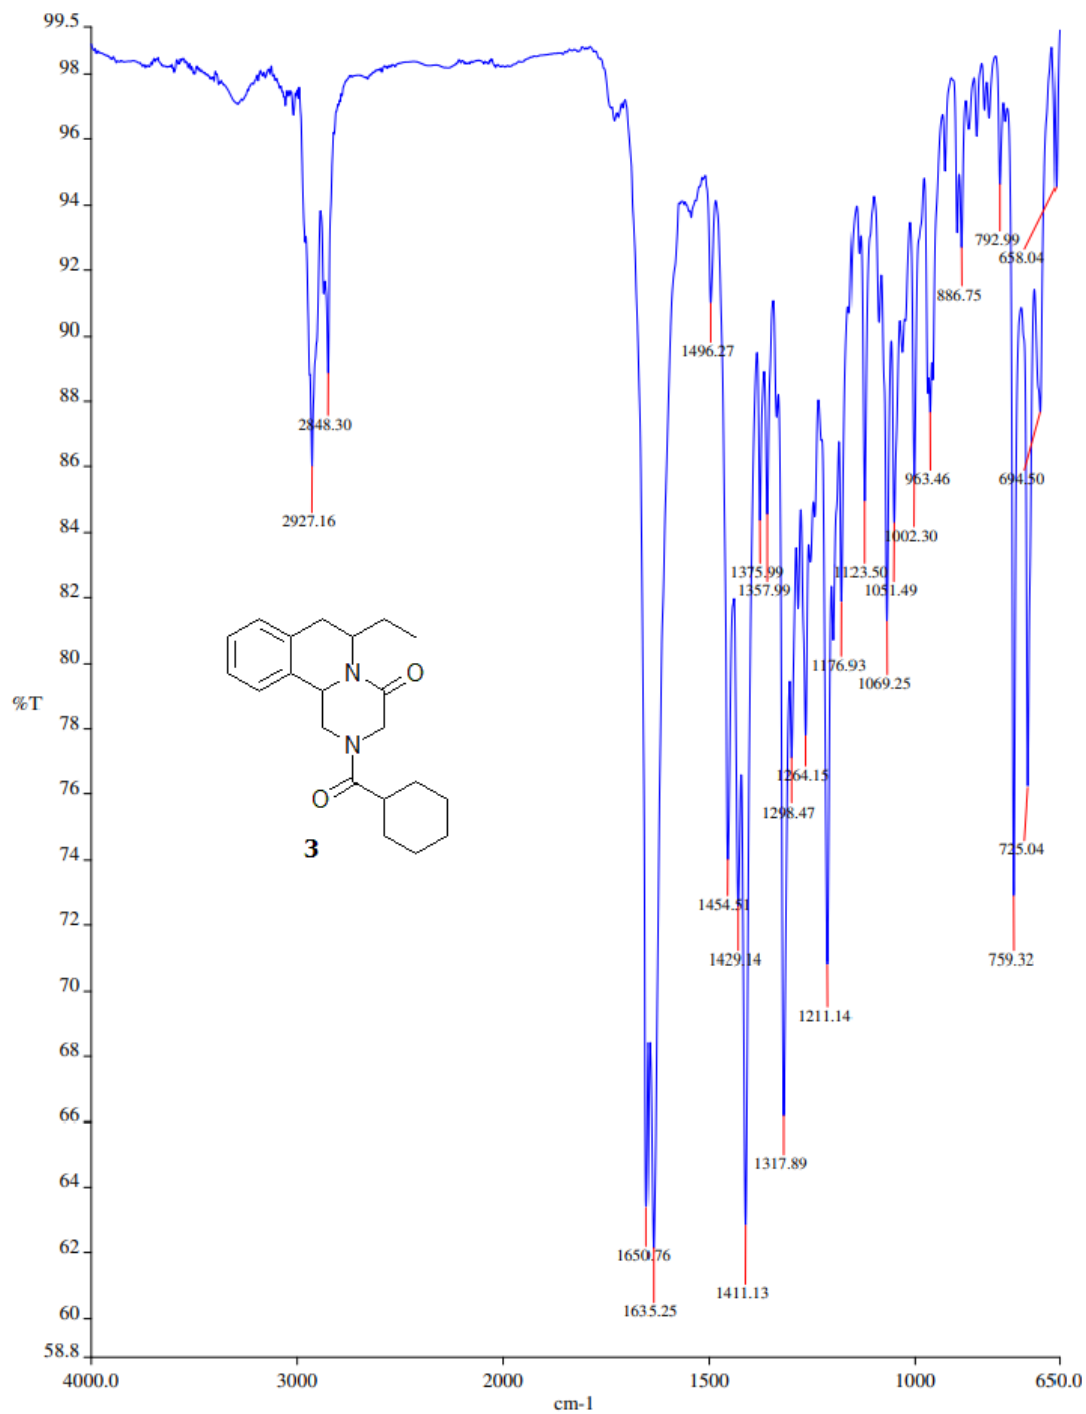

FT-IR spectrum of 2-Cyclohexanecarbonyl-6-ethyl-1,2,3,6,7,11b-hexahydro-pyrazino[2,1-a]isoquinolin-4-one, 6-ethylpraziquantel **23**

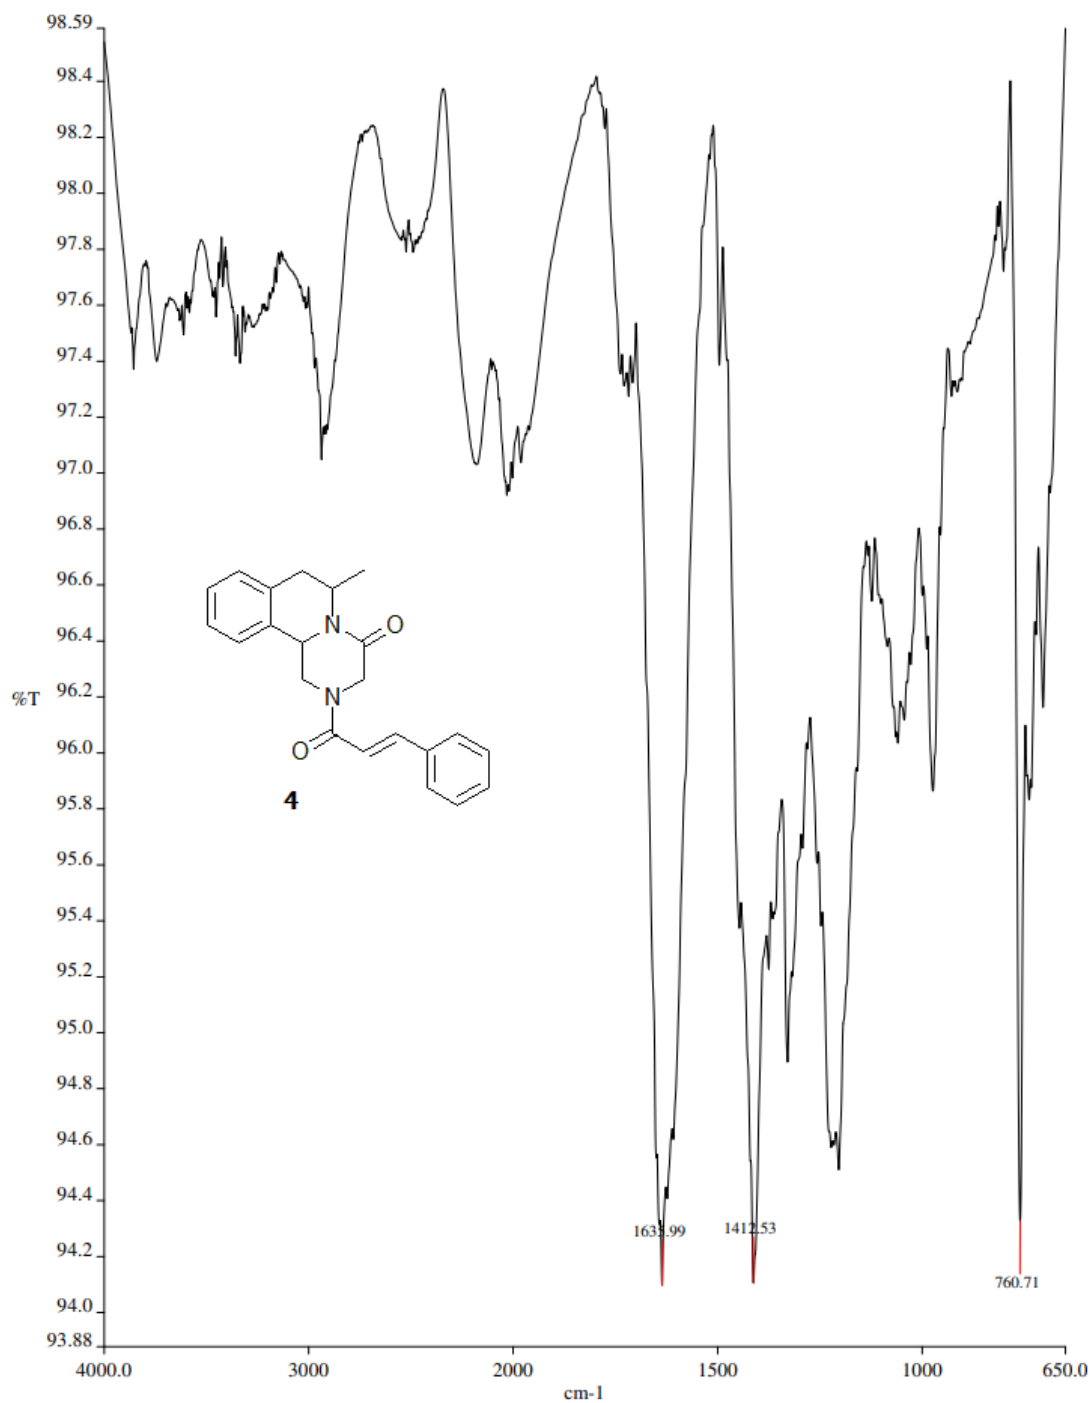

FT-IR spectrum of 6-Methyl-2-[(*E*)-3-phenylprop-2-enoyl]-1,2,3,6,7,11b-hexahydro-4H-pyrazino[2,1-a]isoquinolin-4-one **24**

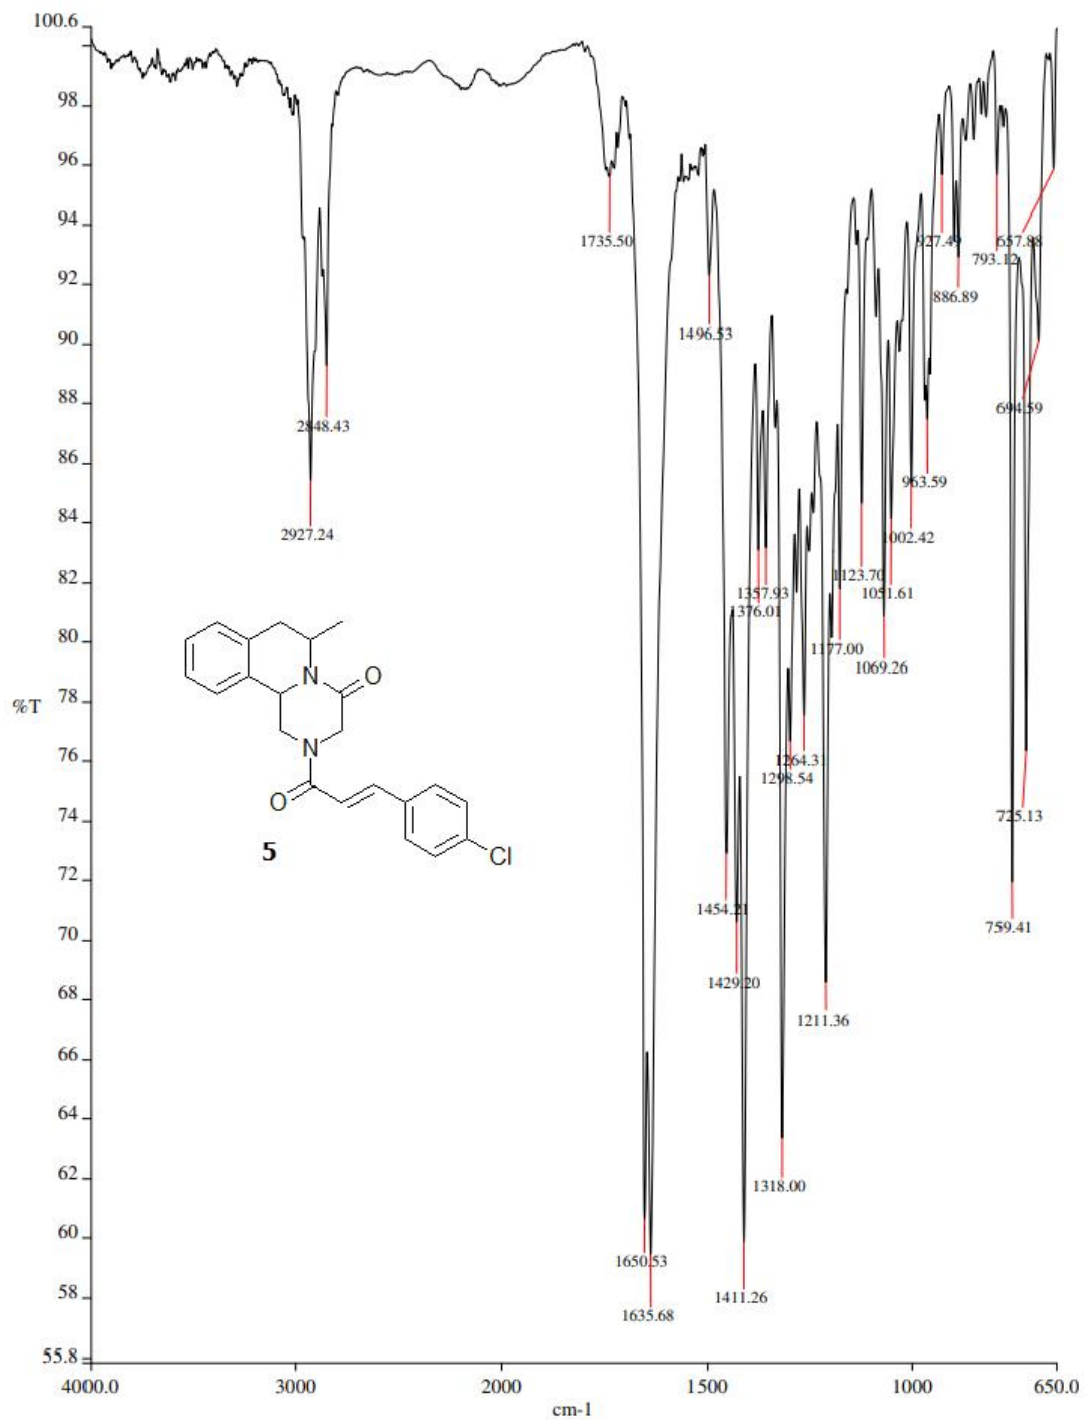

FT-IR spectrum of 2-[(*2E*)-3-(4-Chlorophenyl)prop-2-enoyl]-6-methyl-1,2,3,6,7,11b-hexahydro-4H-pyrazino[2,1-*a*]isoquinolin-4-one **25**

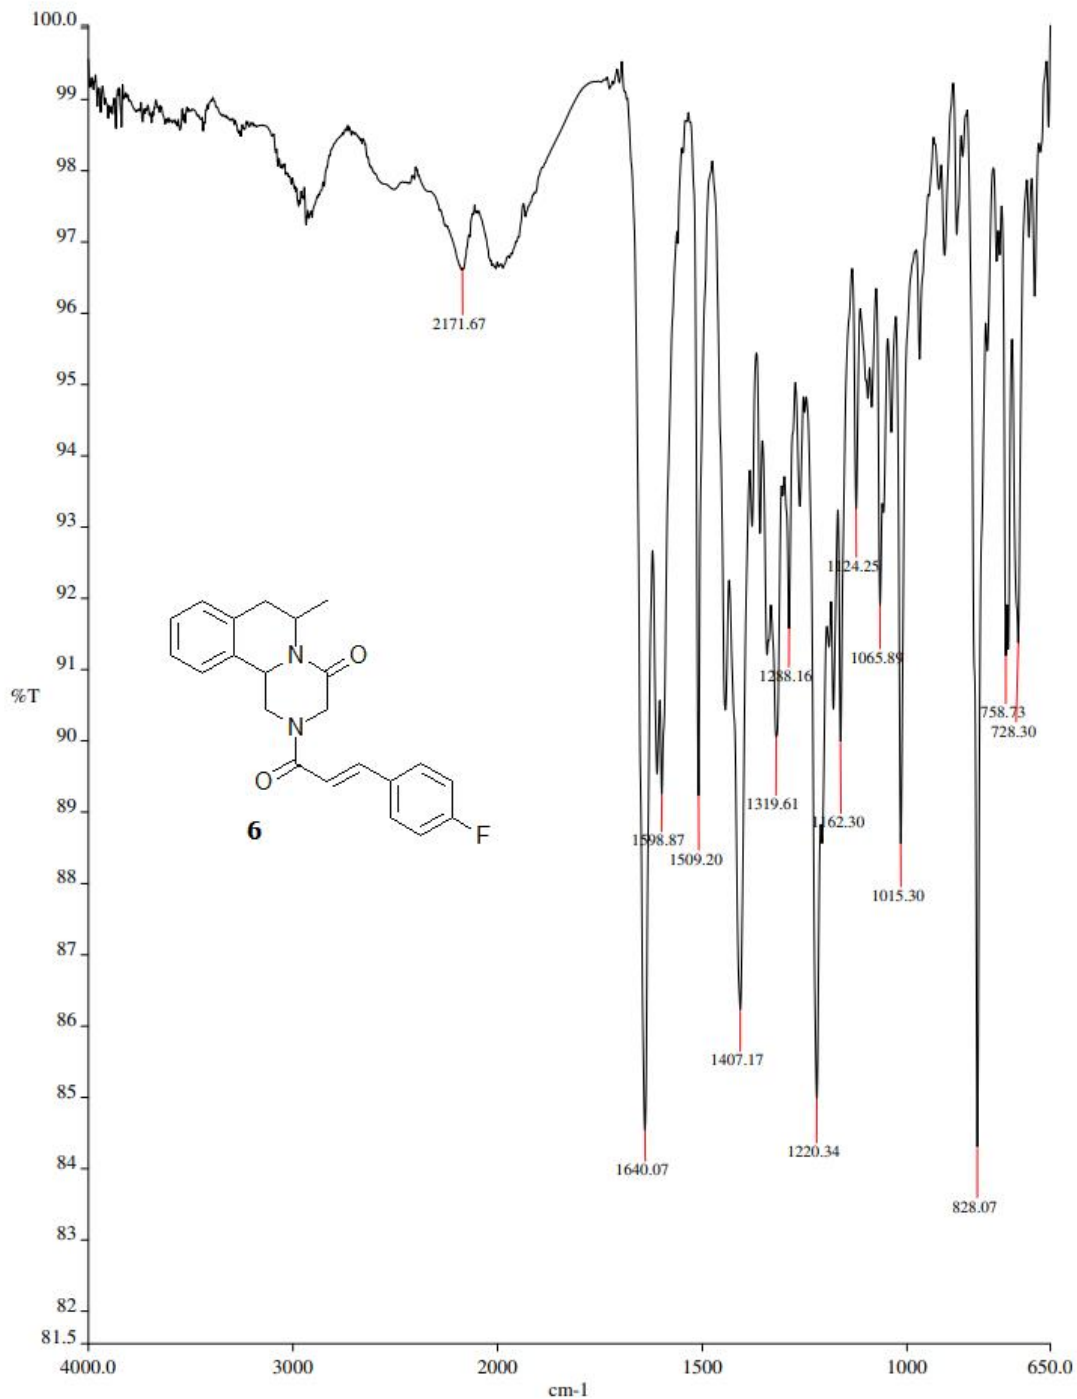

FT-IR spectrum of 2-[(2E)-3-(4-Fluorophenyl)prop-2-enoyl]-6-methyl-1,2,3,6,7,11b-hexahydro-4H-pyrazino[2,1-a]isoquinolin-4-one **26**

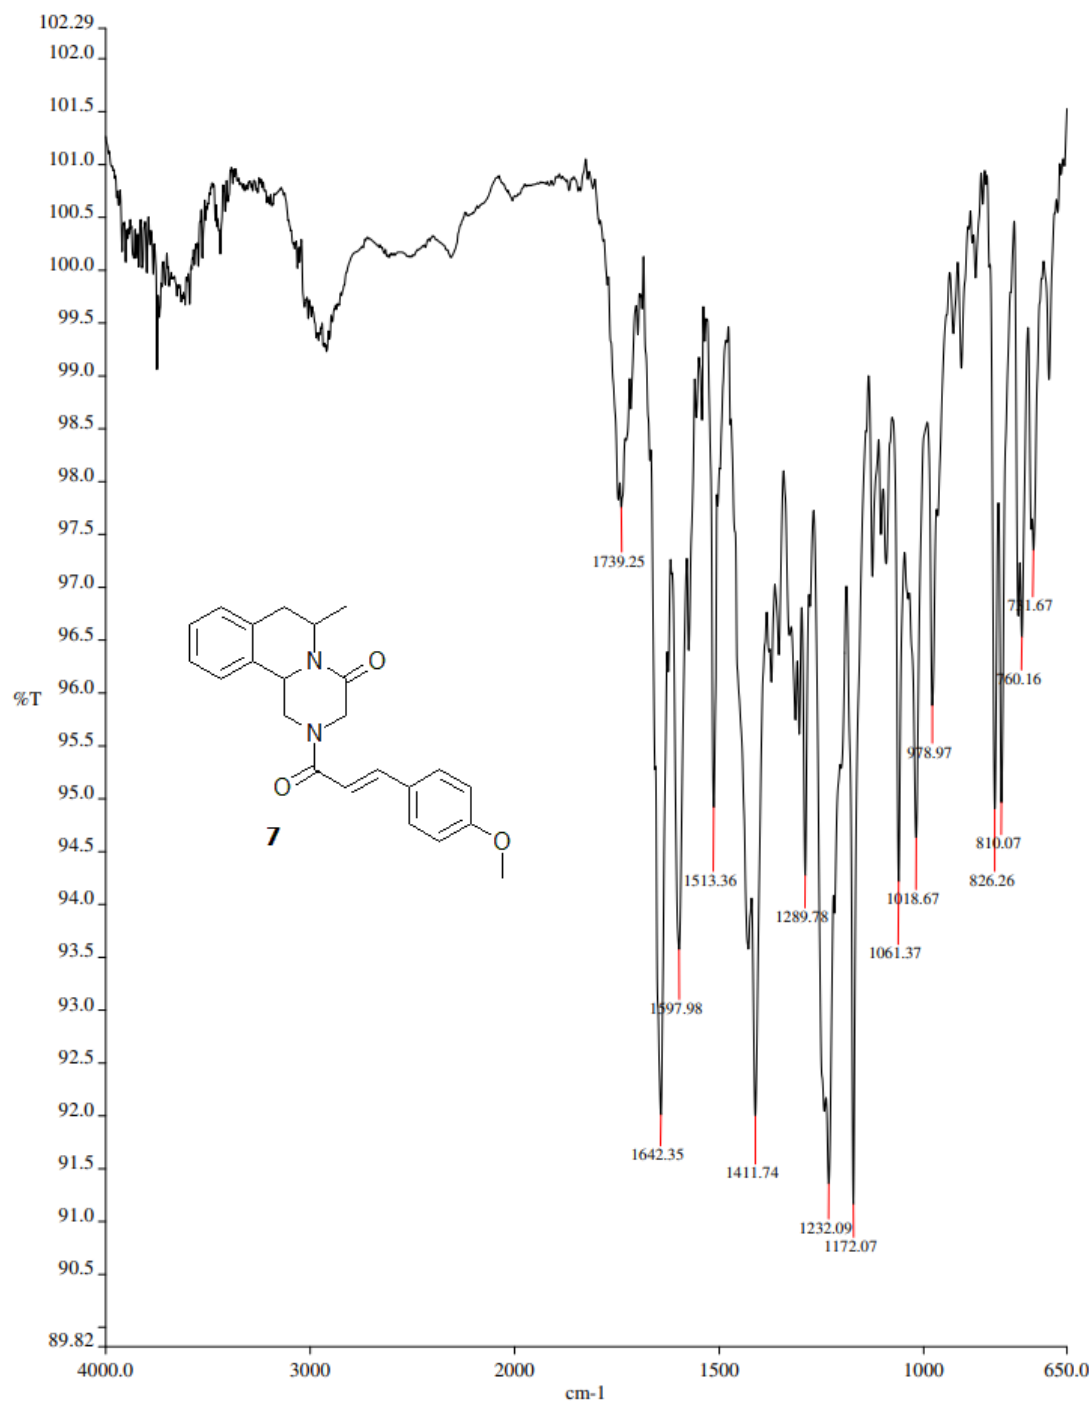

FT-IR spectrum of 2-[(*2E*)-3-(4-Methoxy-phenyl)prop-2-enoyl]-6-methyl-1,2,3,6,7,11b-hexahydro-pyrido[2,1-a]isoquinolin-4-one **27**

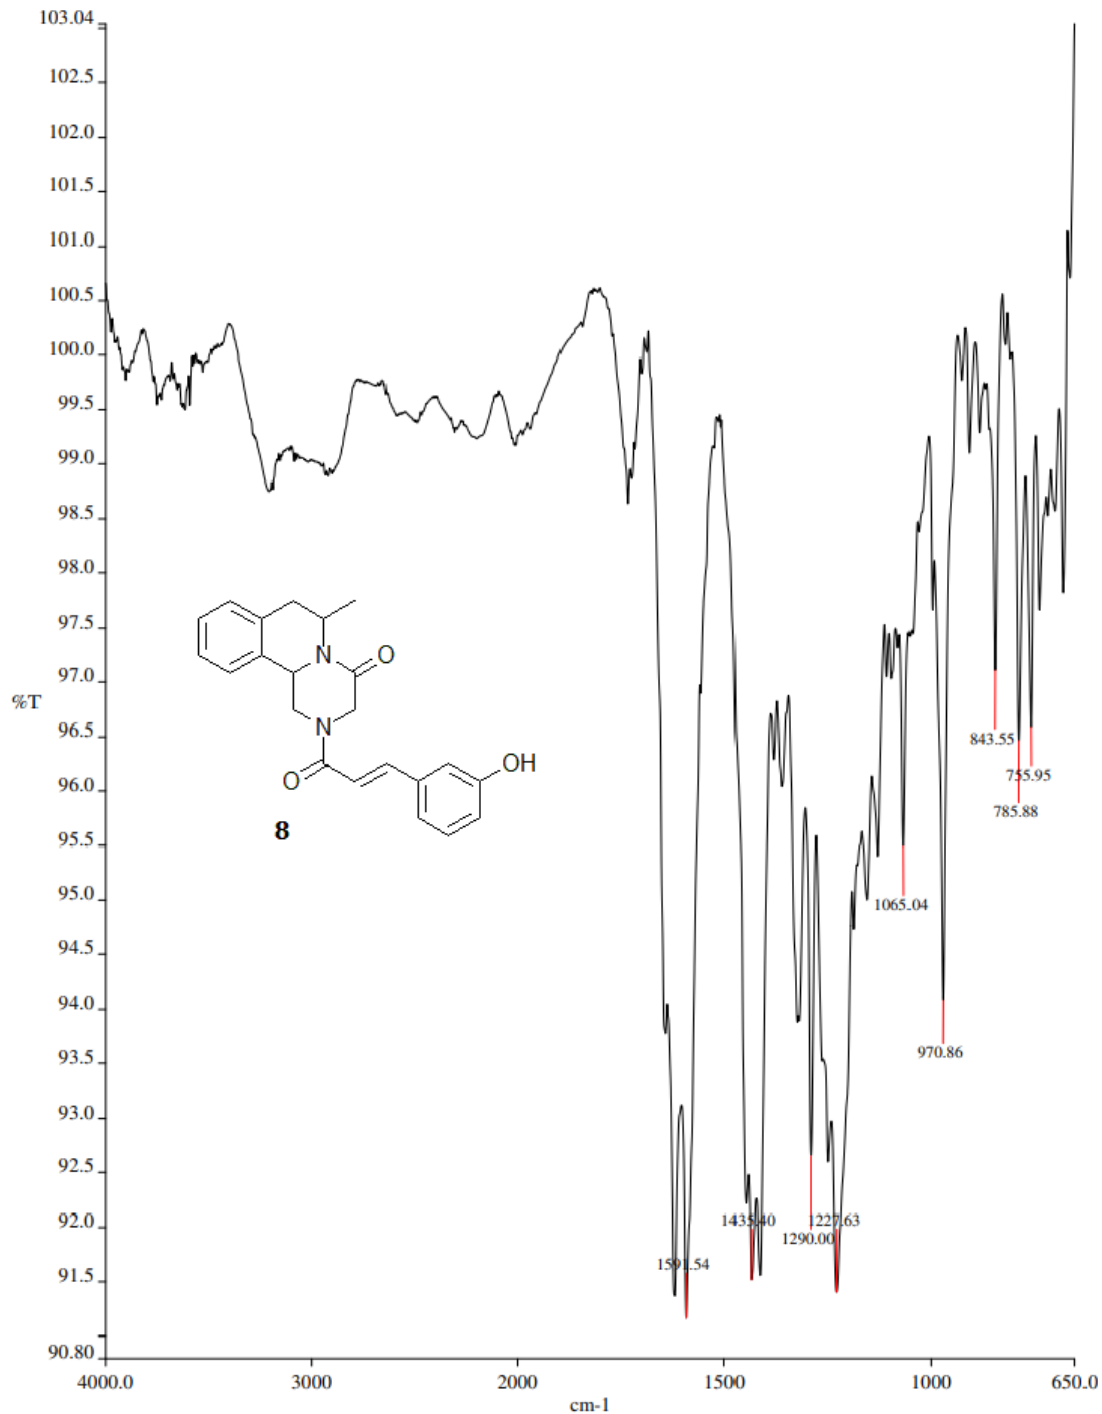

FT-IR spectrum of 2-[(2E)-3-(3-Hydroxyphenyl)prop-2-enoyl]-6-methyl-1,2,3,6,7,11b-hexahydro-4H-pyrazino[2,1-a]isoquinolin-4-one **28**

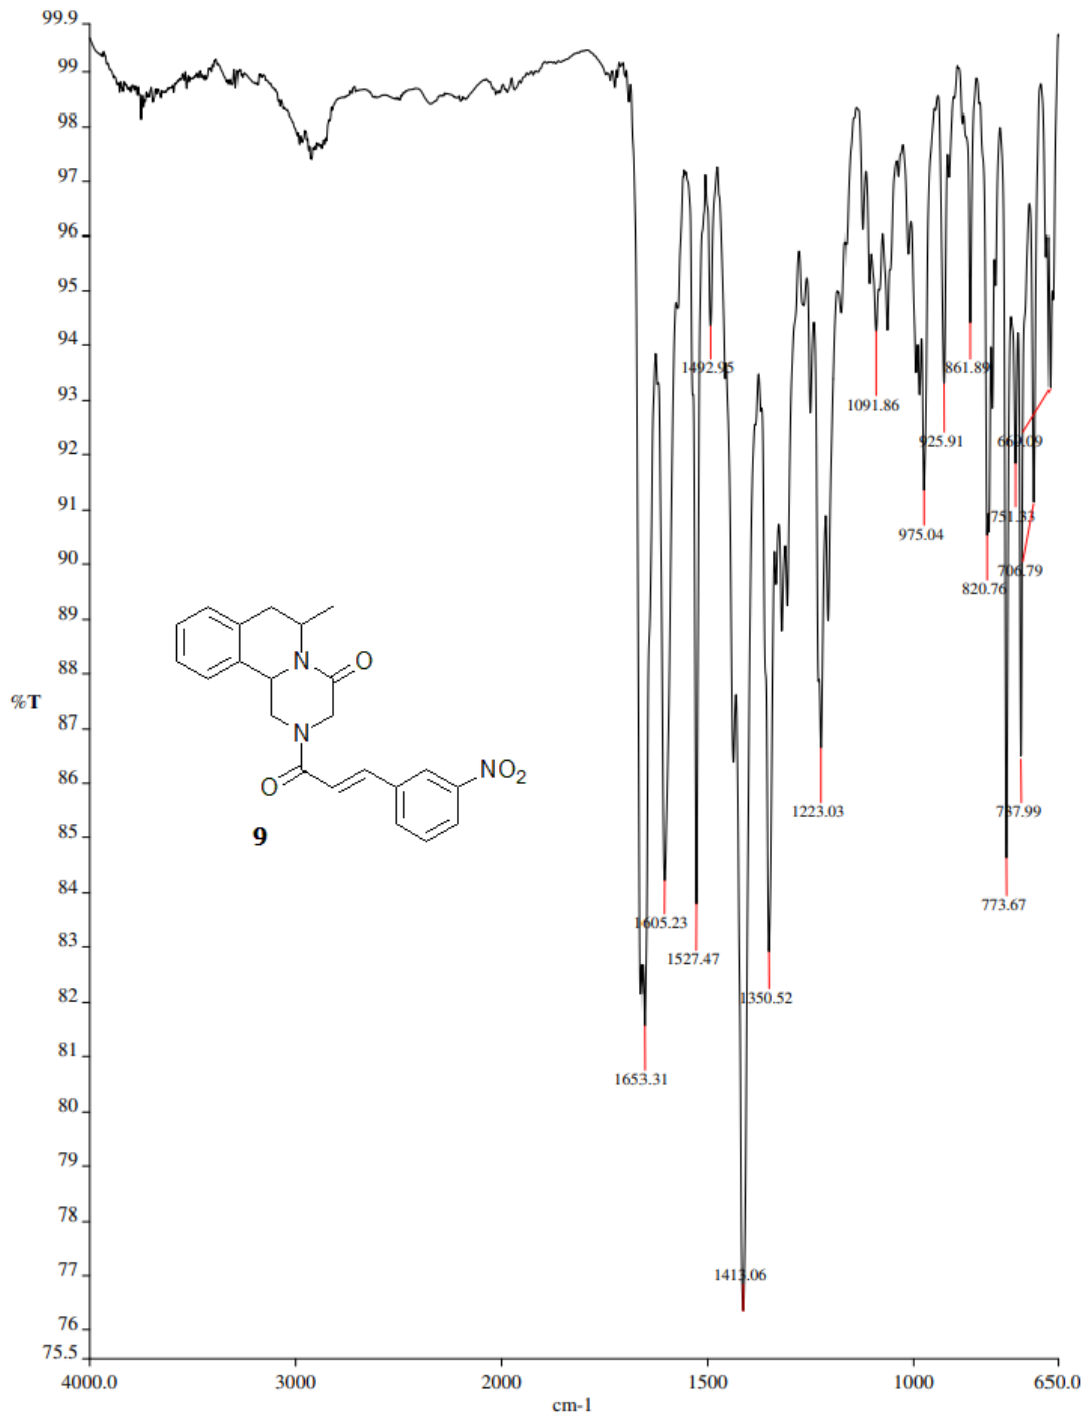

FT-IR spectrum of 2-[(2E)-3-(3-Nitrophenyl)prop-2-enoyl]- 6-methyl-1,2,3,6,7,11b-hexahydro-4H-pyrazino[2,1-a]isoquinolin-4-one **29**



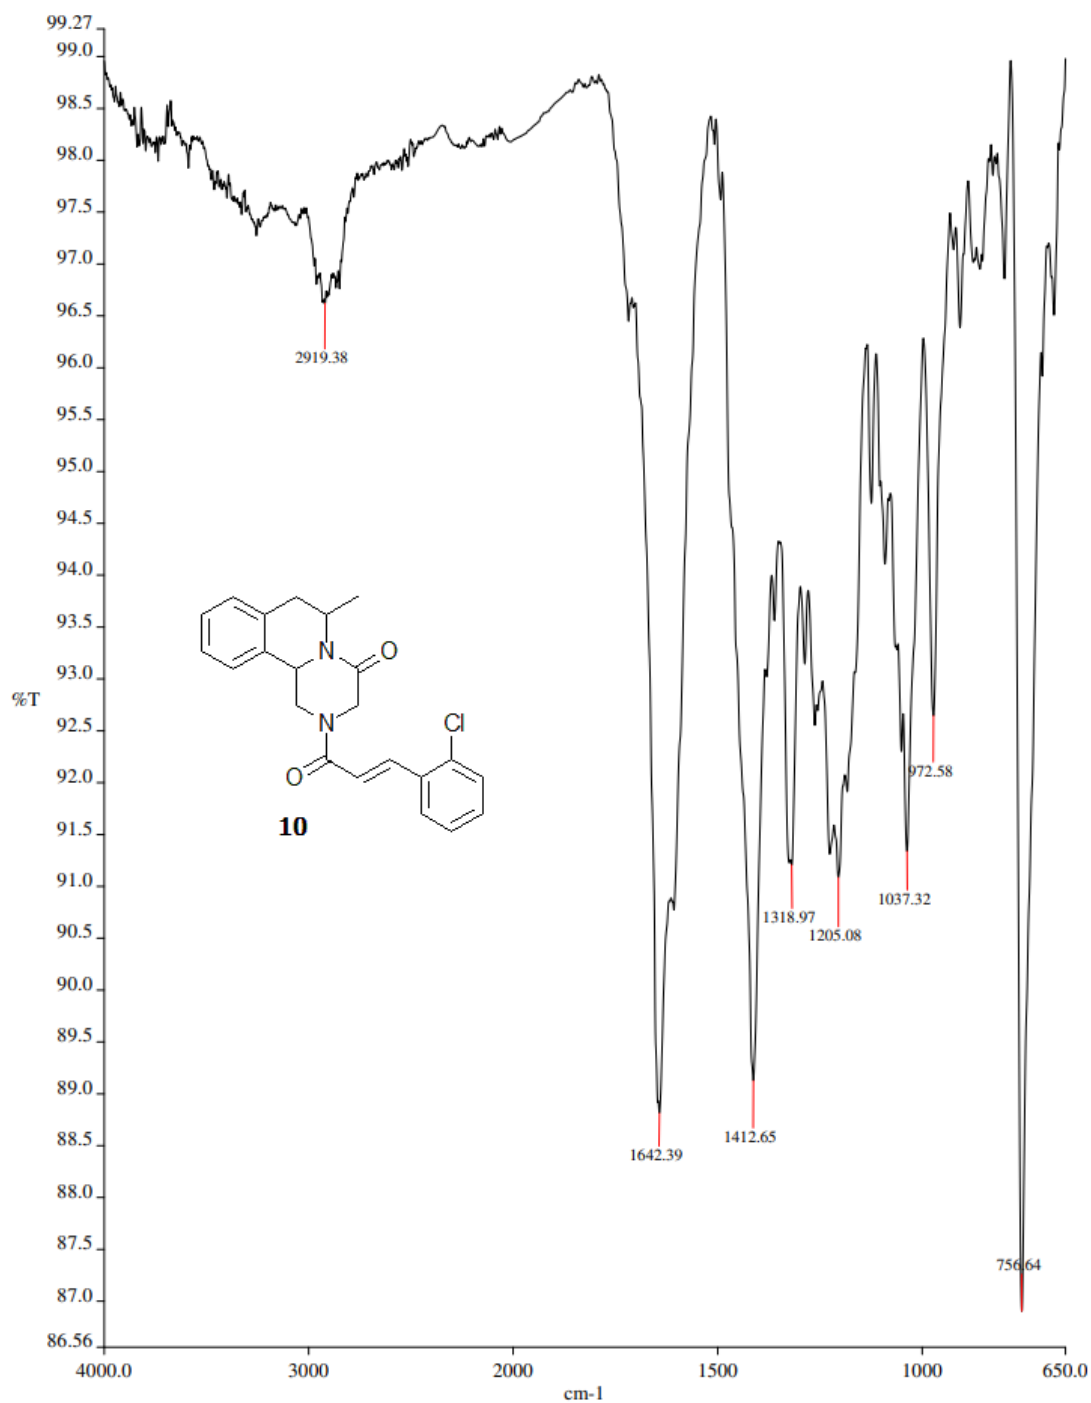

FT-IR spectrum of 2-[(2E)-3-(2-Chlorophenyl)prop-2-enoyl]-6-methyl-1,2,3,6,7,11b-hexahydro-4H-pyrazino[2,1-a]isoquinolin-4-one **30**

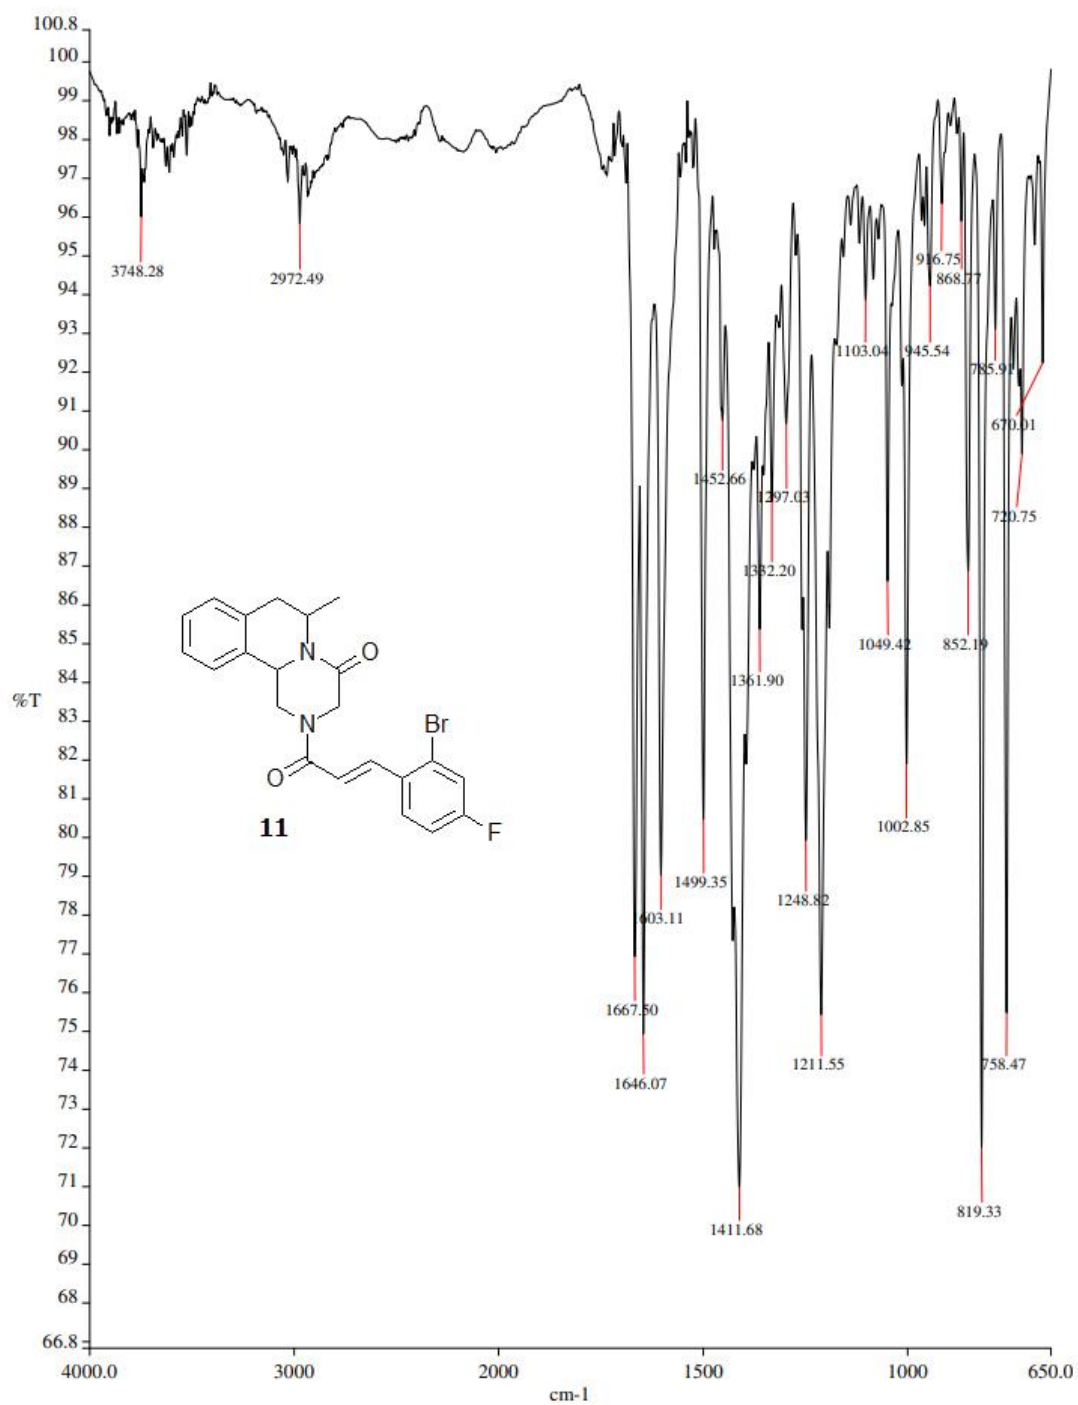

FT-IR spectrum of 2-[(*E*)-3-(2-Bromo-4-fluorophenyl)prop-2-enoyl]-6-methyl-1,2,3,6,7,11b-hexahydro-4H-pyrazino[2,1-a]isoquinolin-4-one **31**

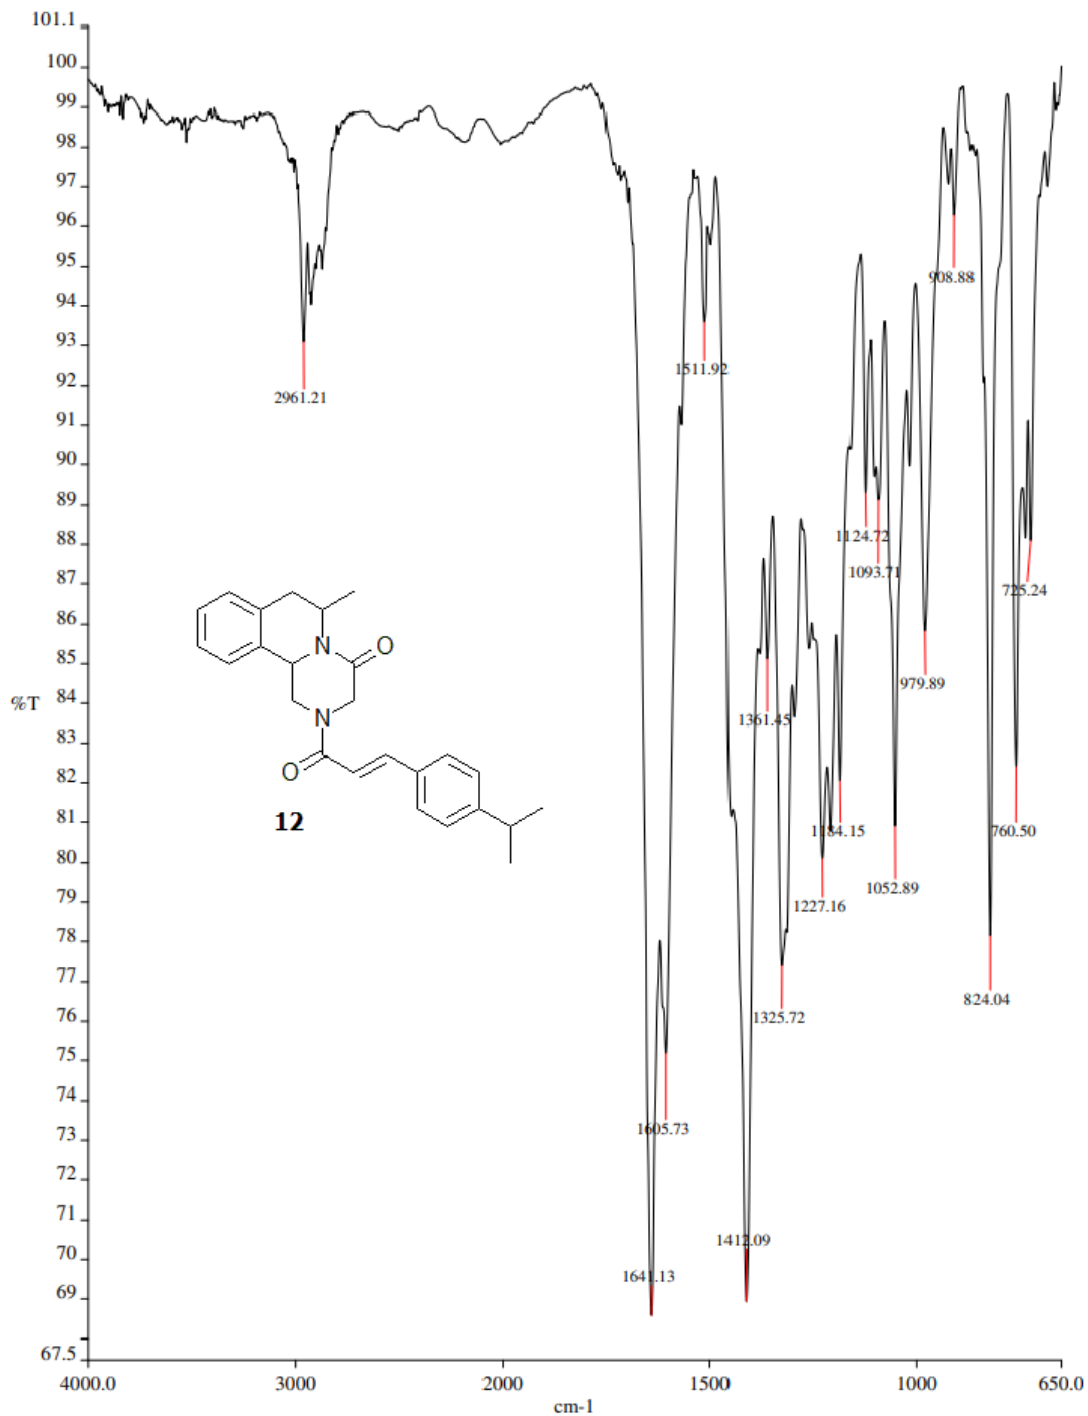

FT-IR spectrum of 2-[(*2E*)-3-(2-Bromo-4-fluorophenyl)prop-2-enoyl]-6-methyl-1,2,3,6,7,11b-hexahydro-4H-pyrazino[2,1-a]isoquinolin-4-one **32**

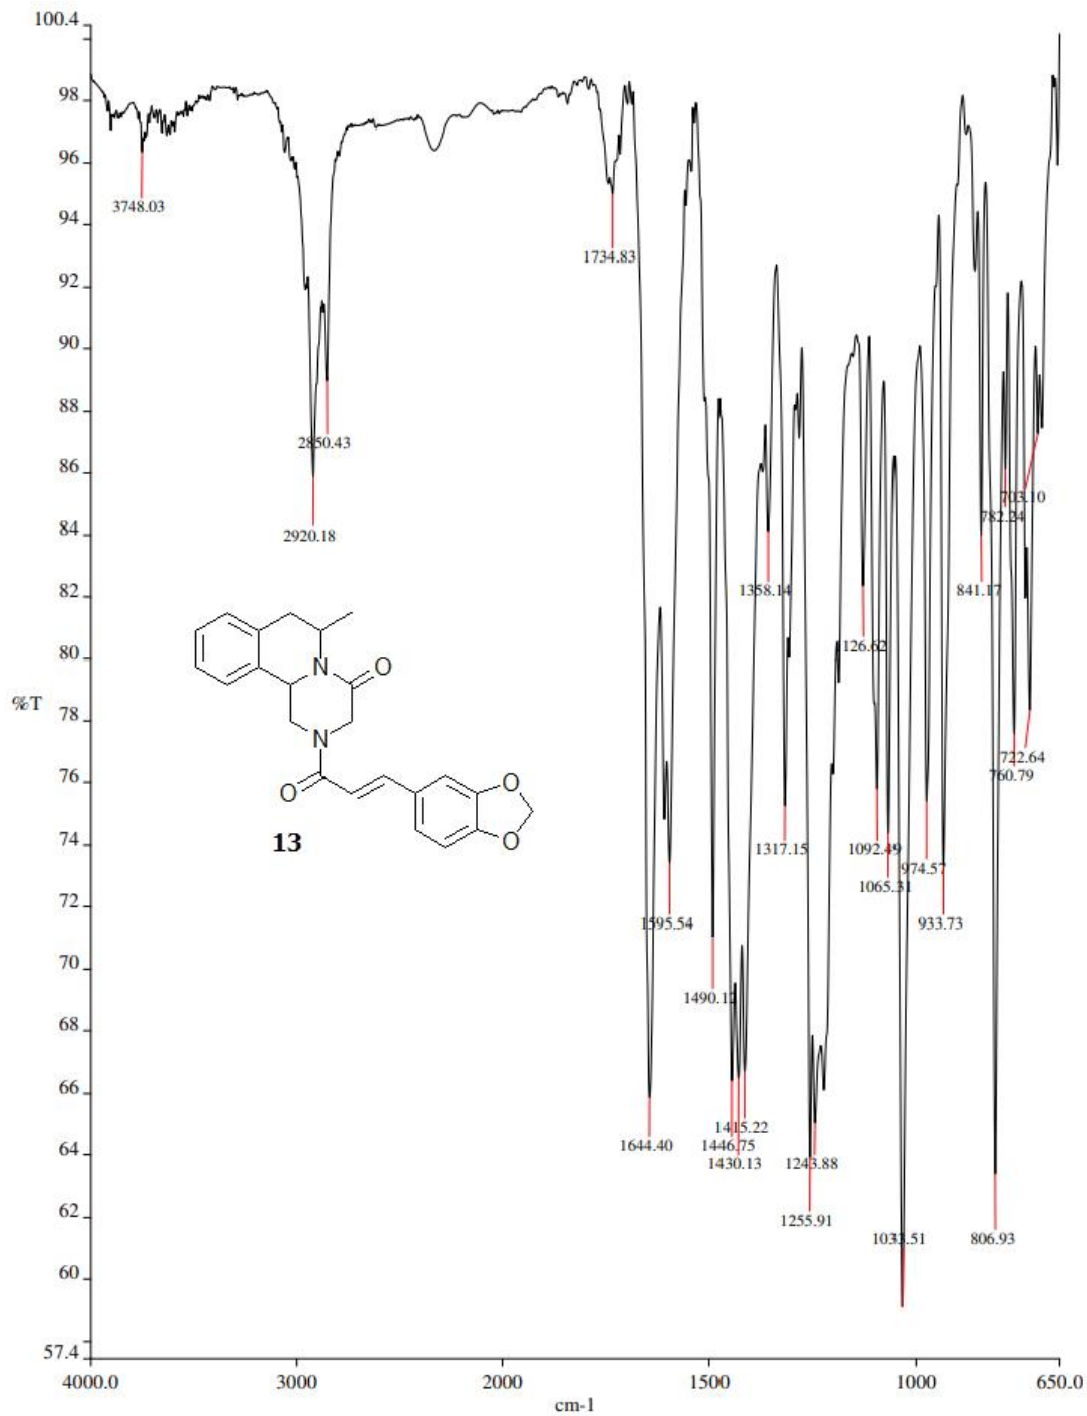

FT-IR spectrum of 6-Ethyl-2-[(2E)-3-phenylprop-2-enoyl]-1,2,3,6,7,11b-hexahydro-4H-pyrazino[2,1-a]isoquinolin-4-one **33**

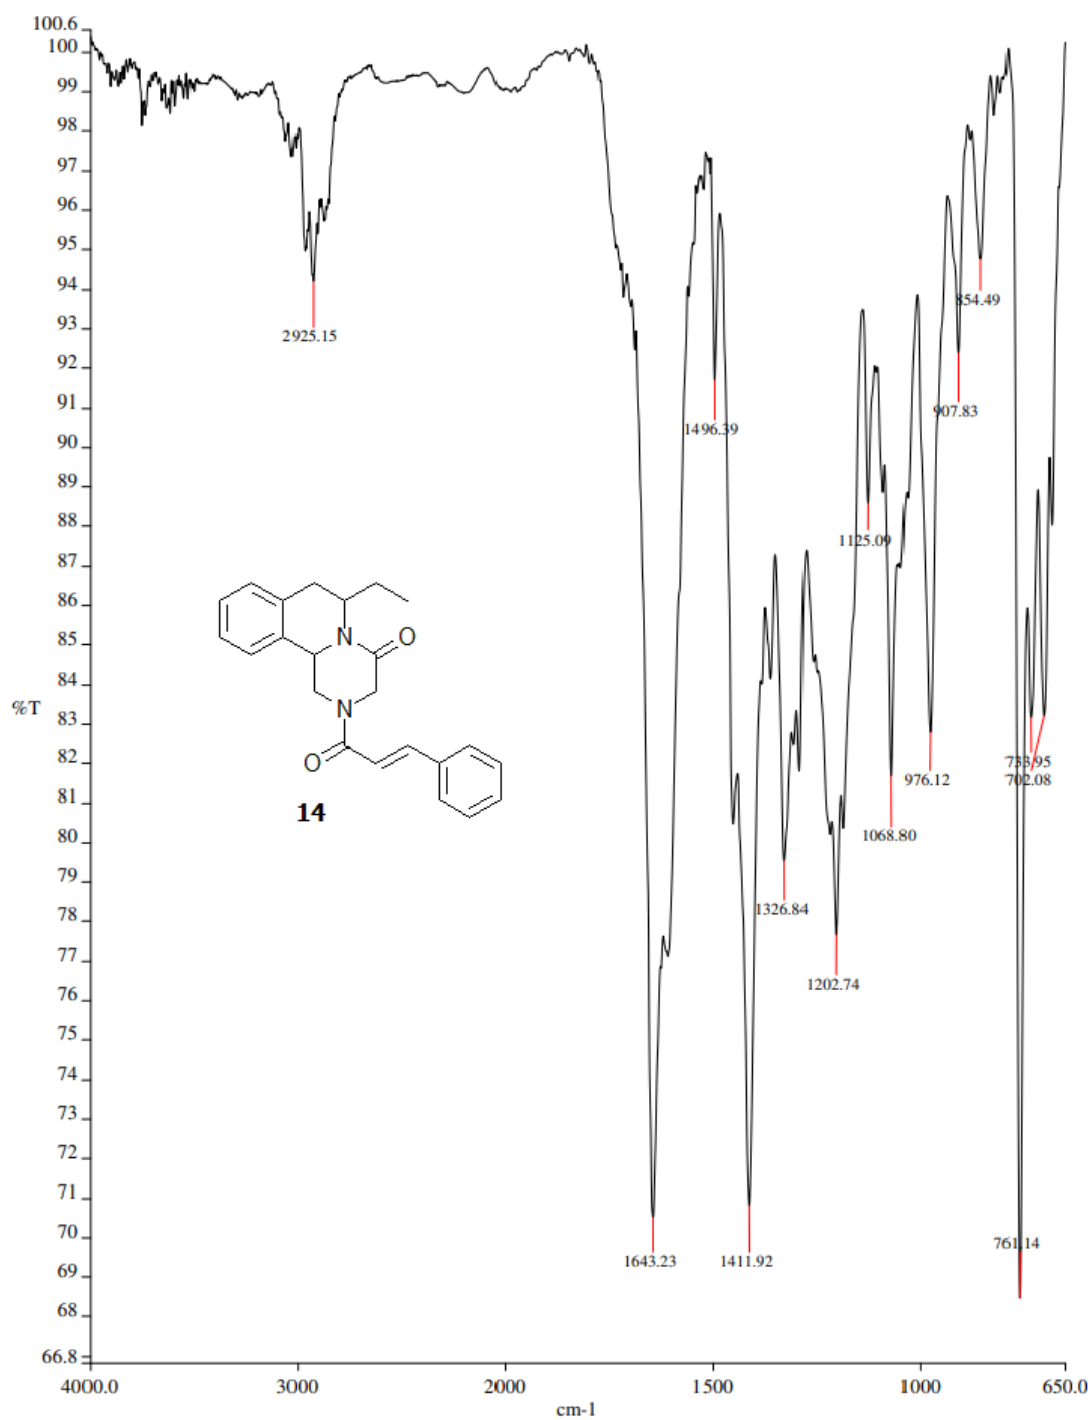

FT-IR spectrum of 6-Ethyl-2-[(2E)-3-phenylprop-2-enoyl]-1,2,3,6,7,11b-hexahydro-4H-pyrazino[2,1-a]isoquinolin-4-one **34**

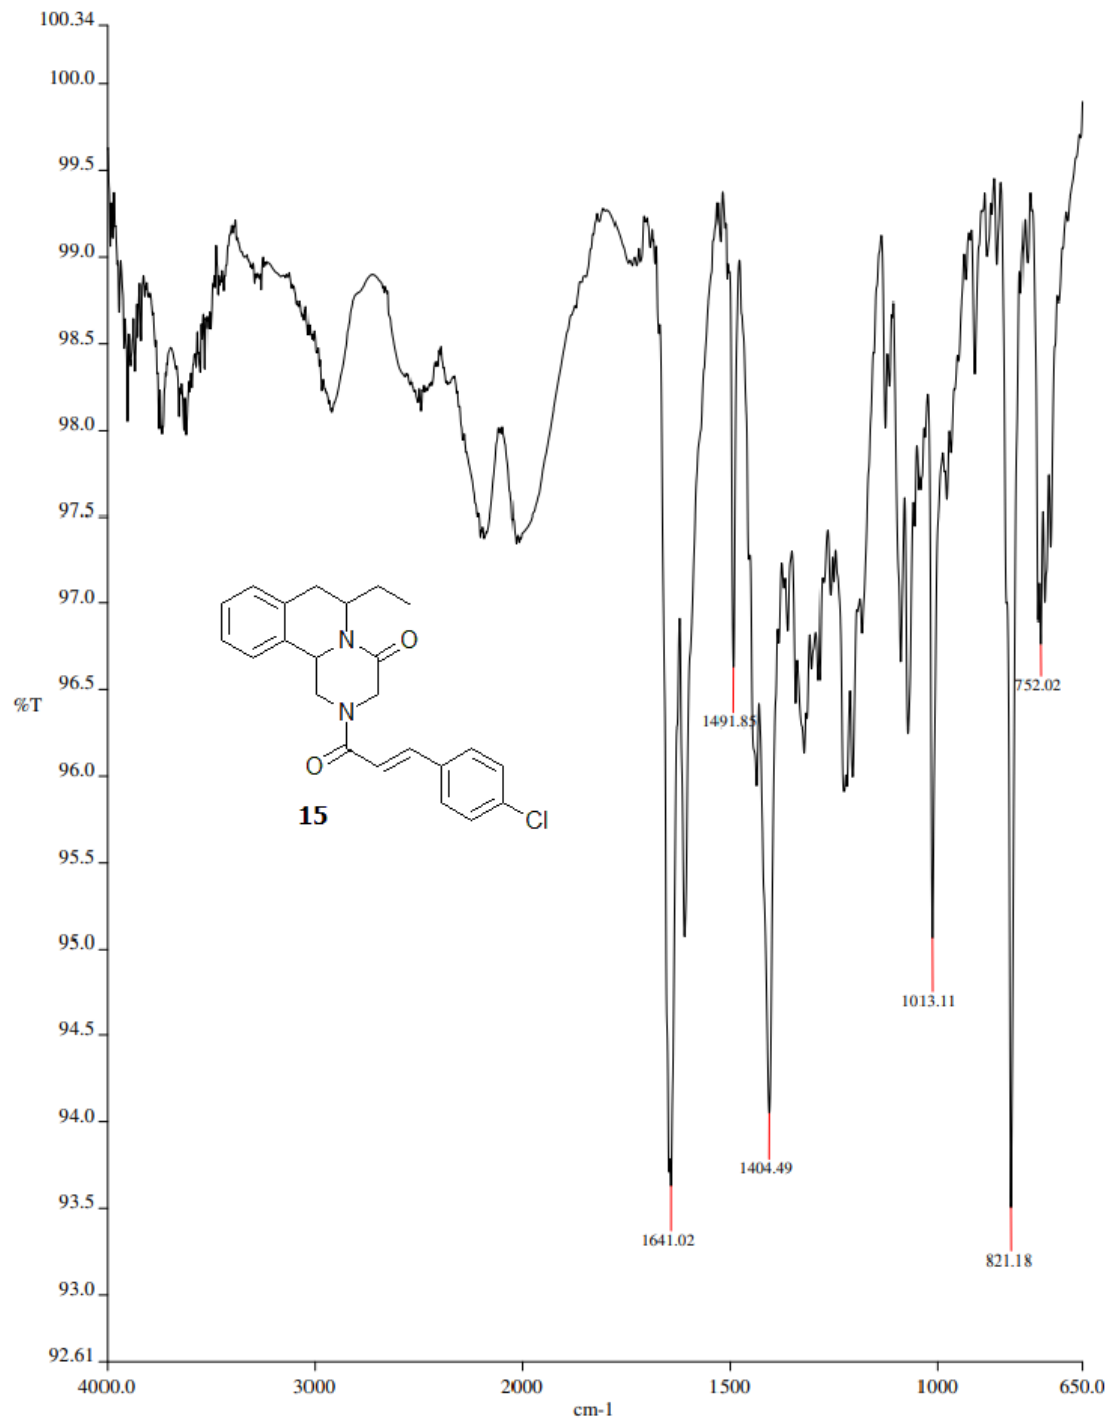

FT-IR spectrum of 6-Ethyl-2-[(*2E*)-3-phenylprop-2-en-1-yl]-1,2,3,6,7,11b-hexahydro-4H-pyrazino[2,1-a]isoquinolin-4-one **35**

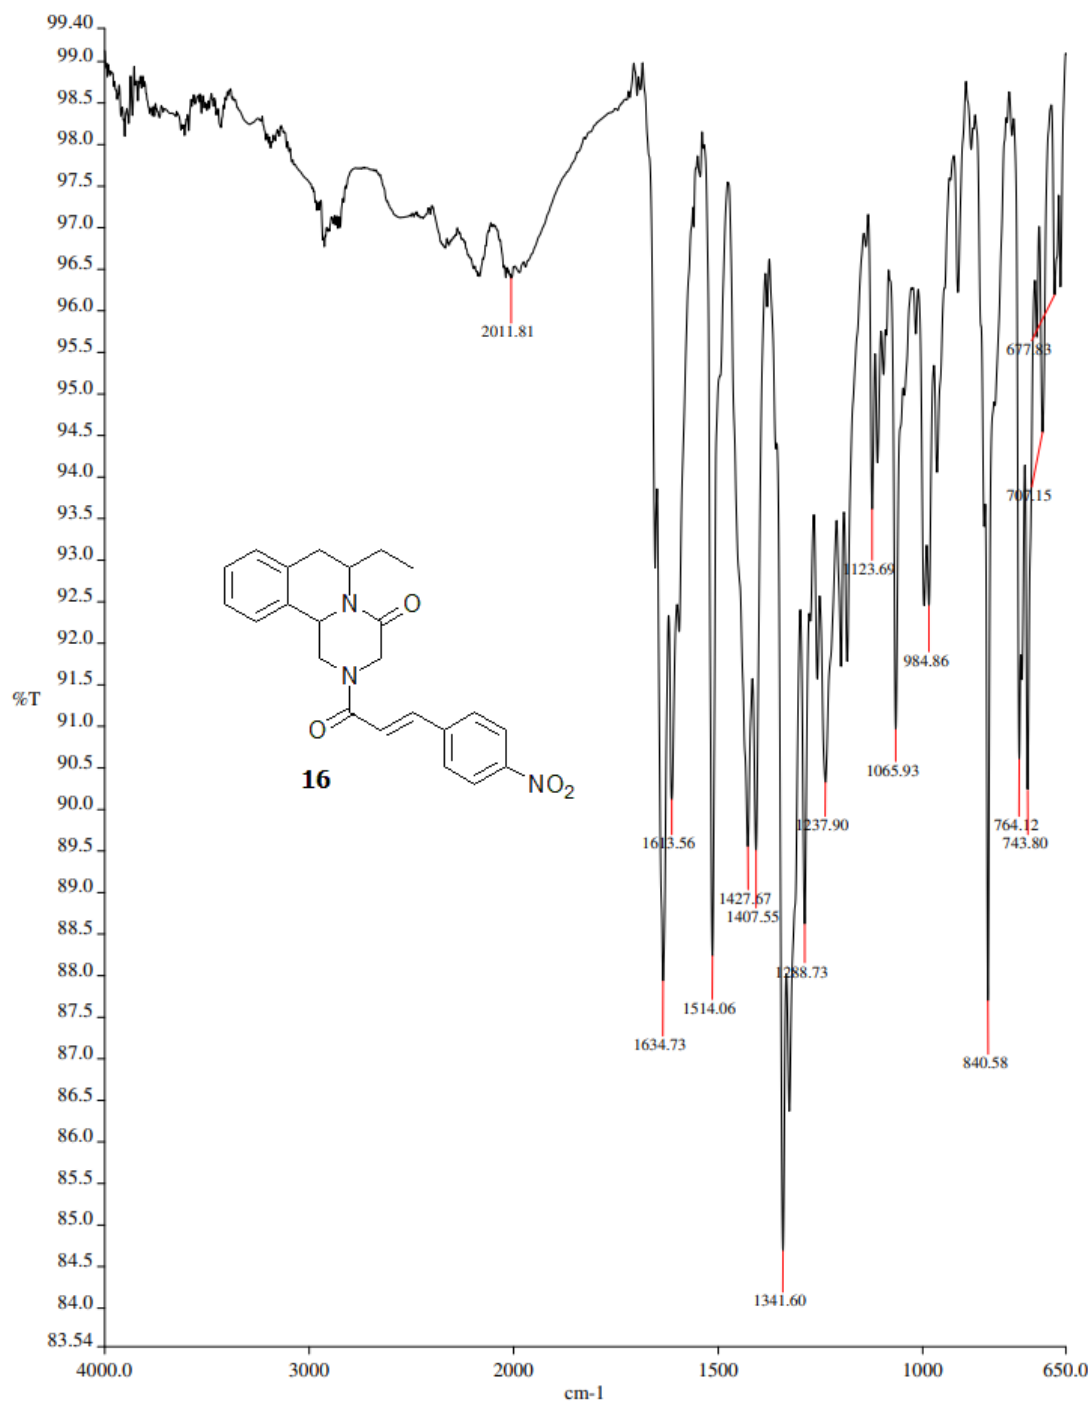

FT-IR spectrum of 6-Ethyl-2-[(2E)-3-phenylprop-2-enoyl]-1,2,3,6,7,11b-hexahydro-4H-pyrazino[2,1-a]isoquinolin-4-one **36**

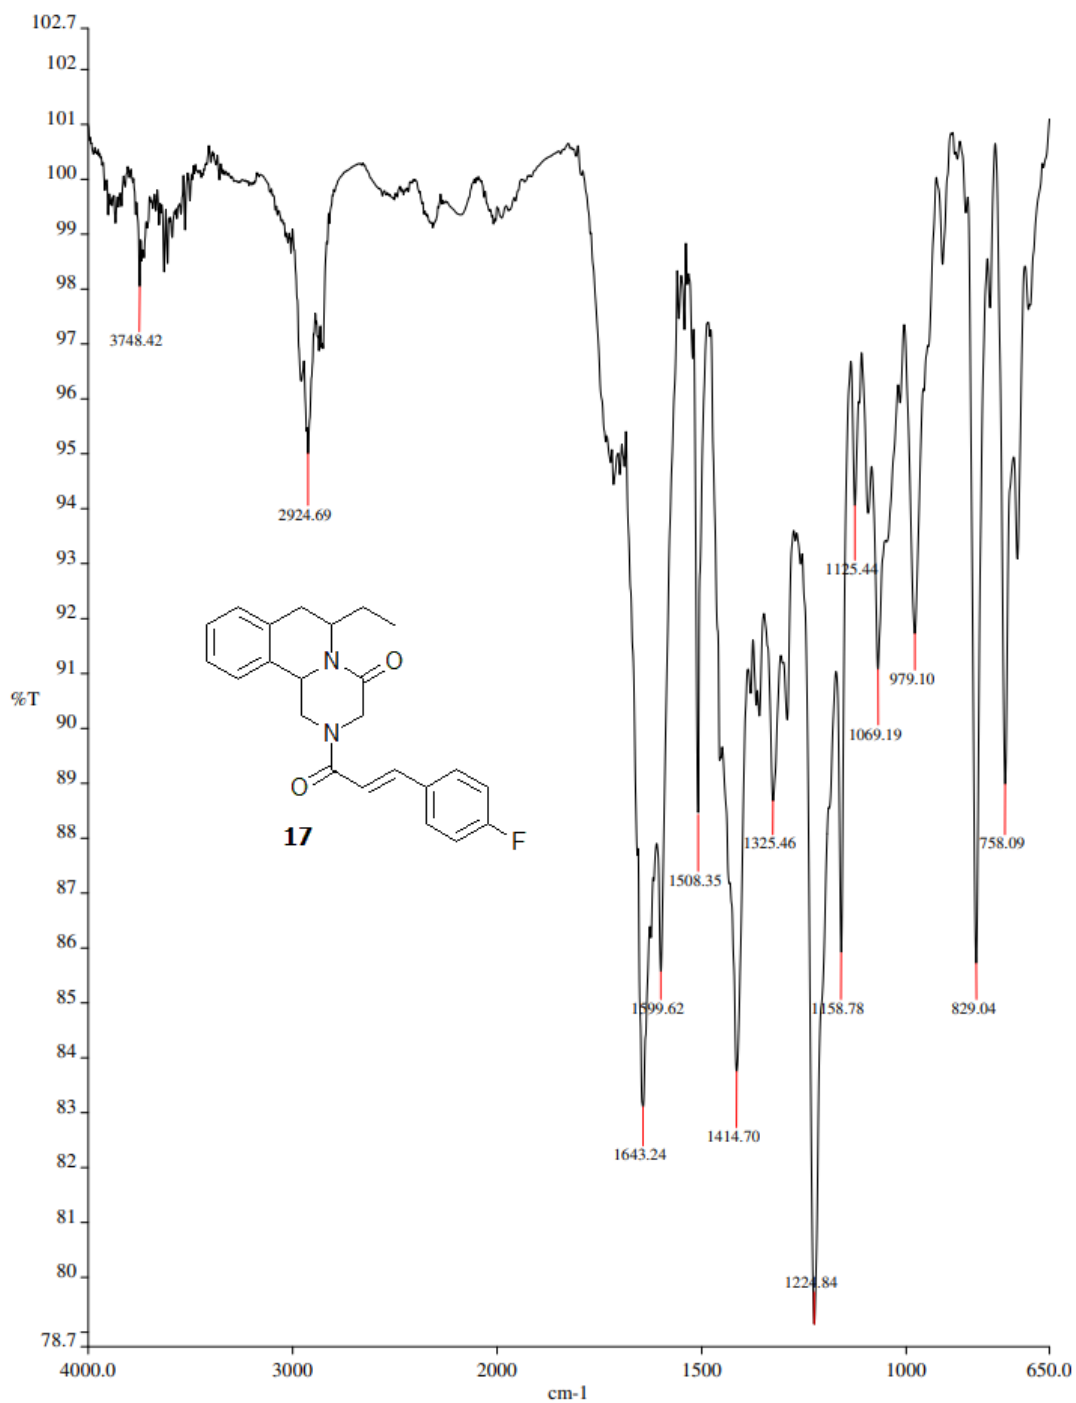

FT-IR spectrum of 6-Ethyl-2-[(2E)-3-phenylprop-2-en-1-yl]-1,2,3,6,7,11b-hexahydro-4H-pyrazino[2,1-a]isoquinolin-4-one **37**



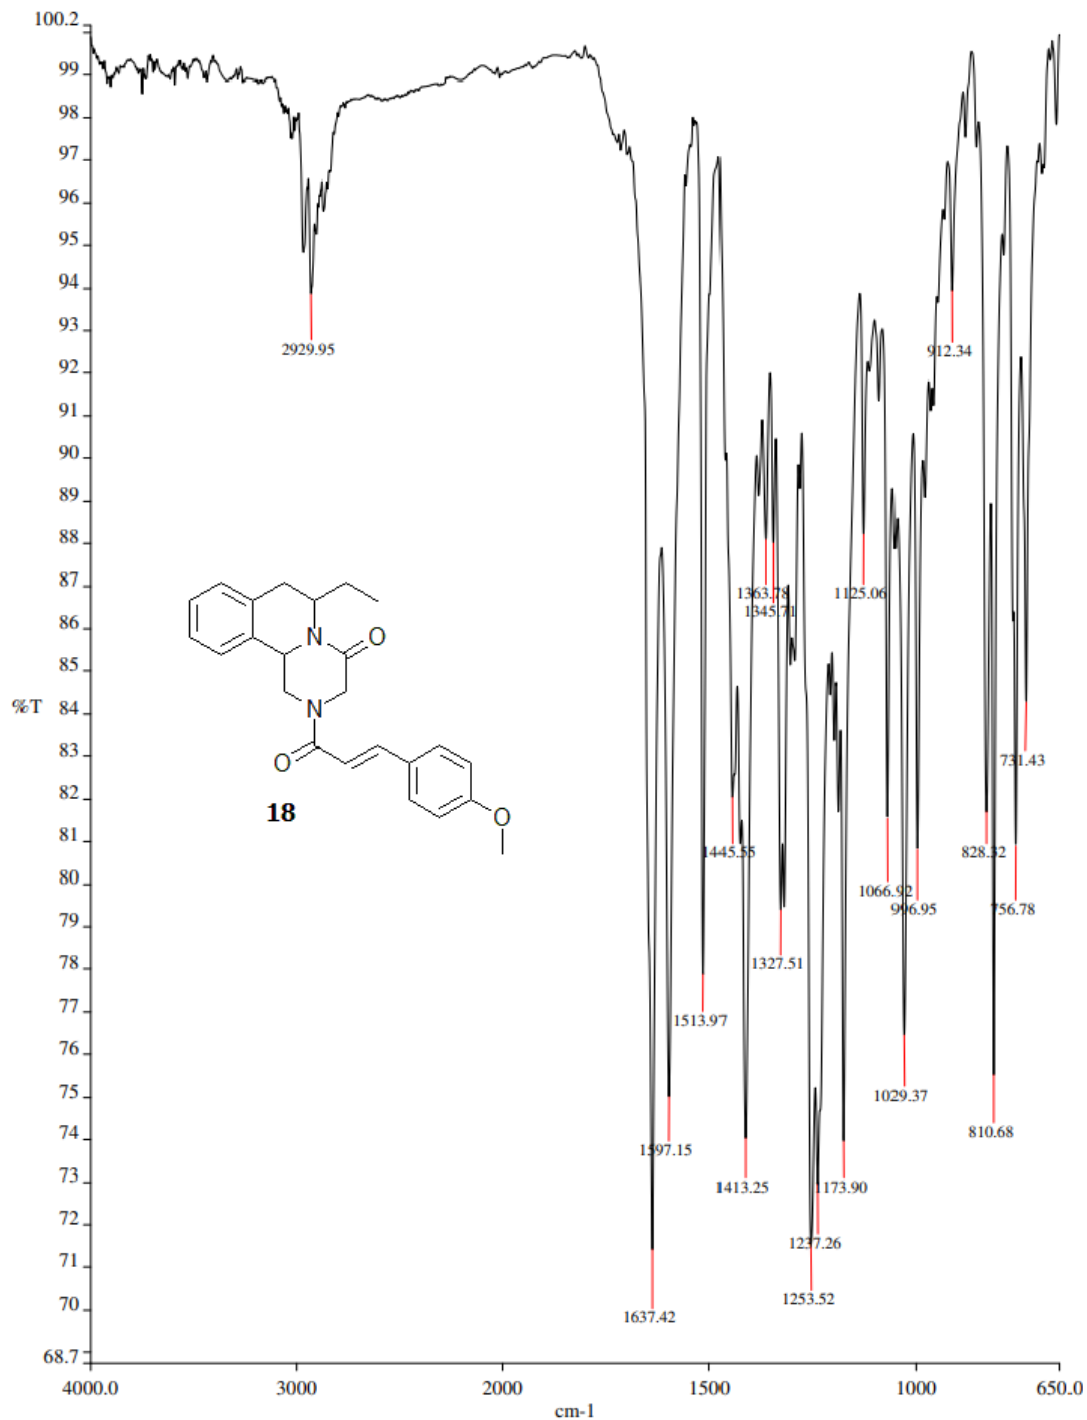

FT-IR spectrum of 6-Ethyl-2-[(2E)-3-phenylprop-2-en-1-yl]-1,2,3,6,7,11b-hexahydro-4H-pyrazino[2,1-a]isoquinolin-4-one **38**

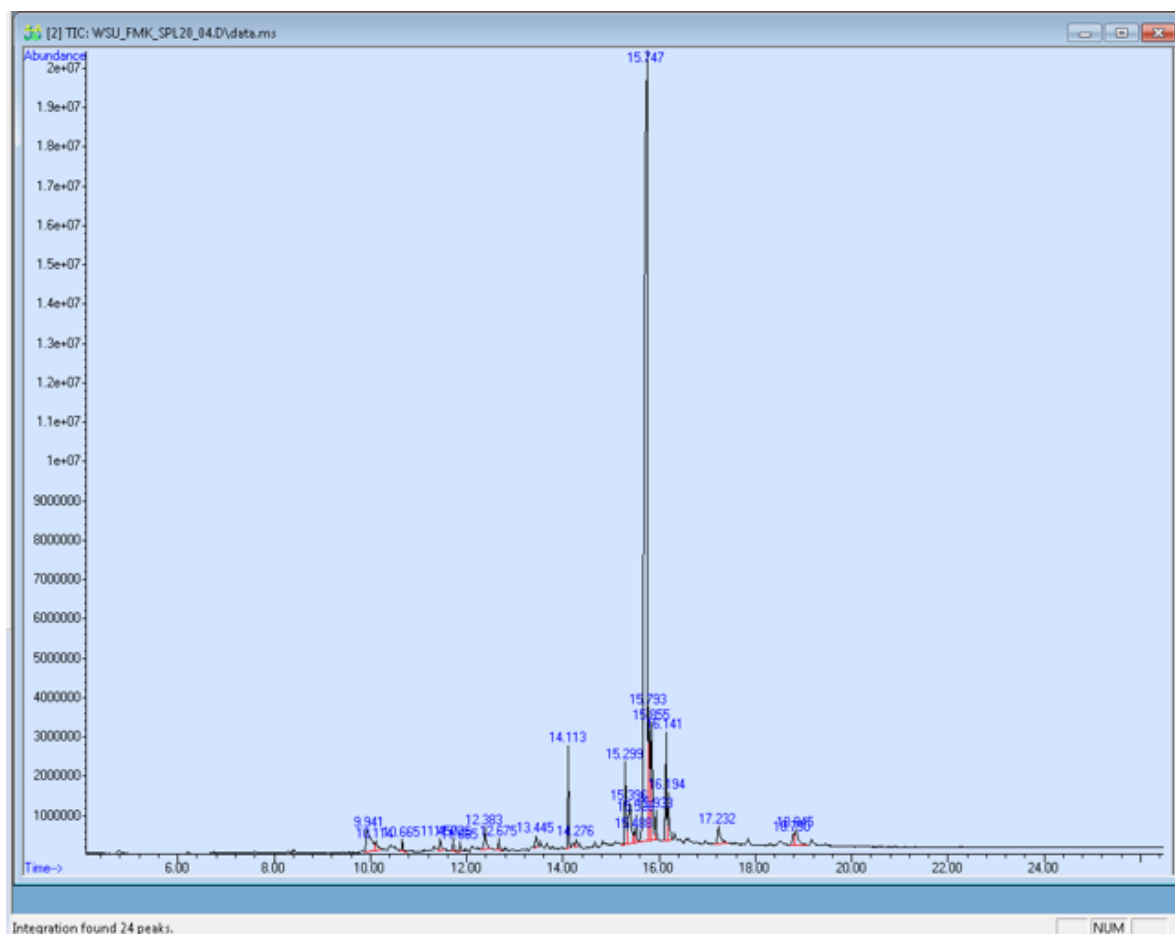

Chromatograph of **22**.

Abundance

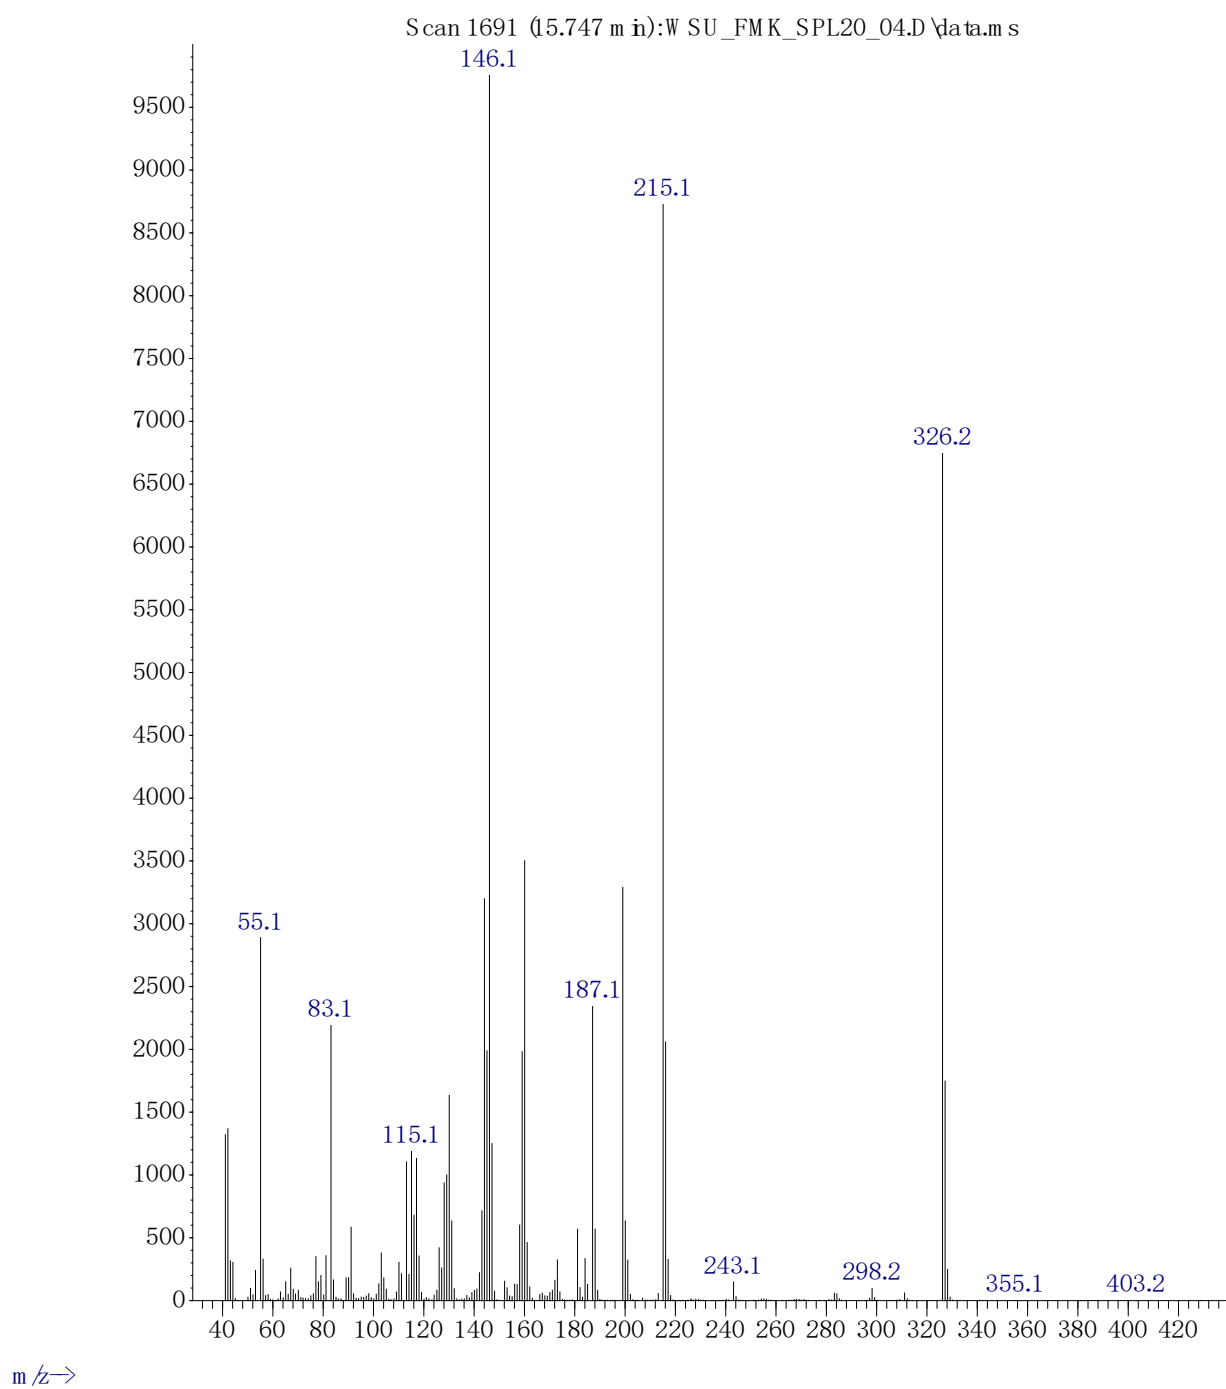Mass spectrum (m/z) of **22**.

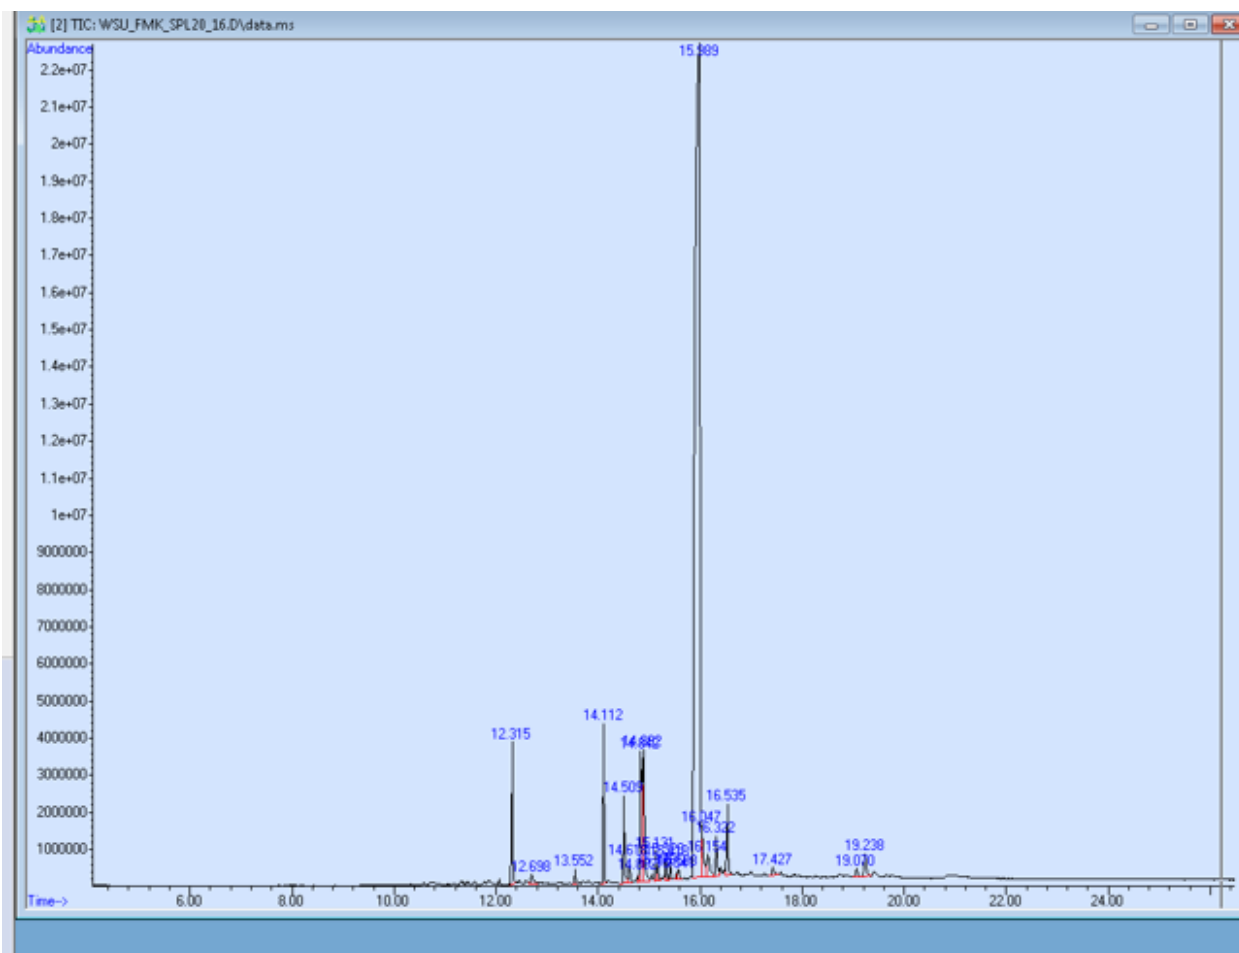Chromatogram of **23**.

Abundance

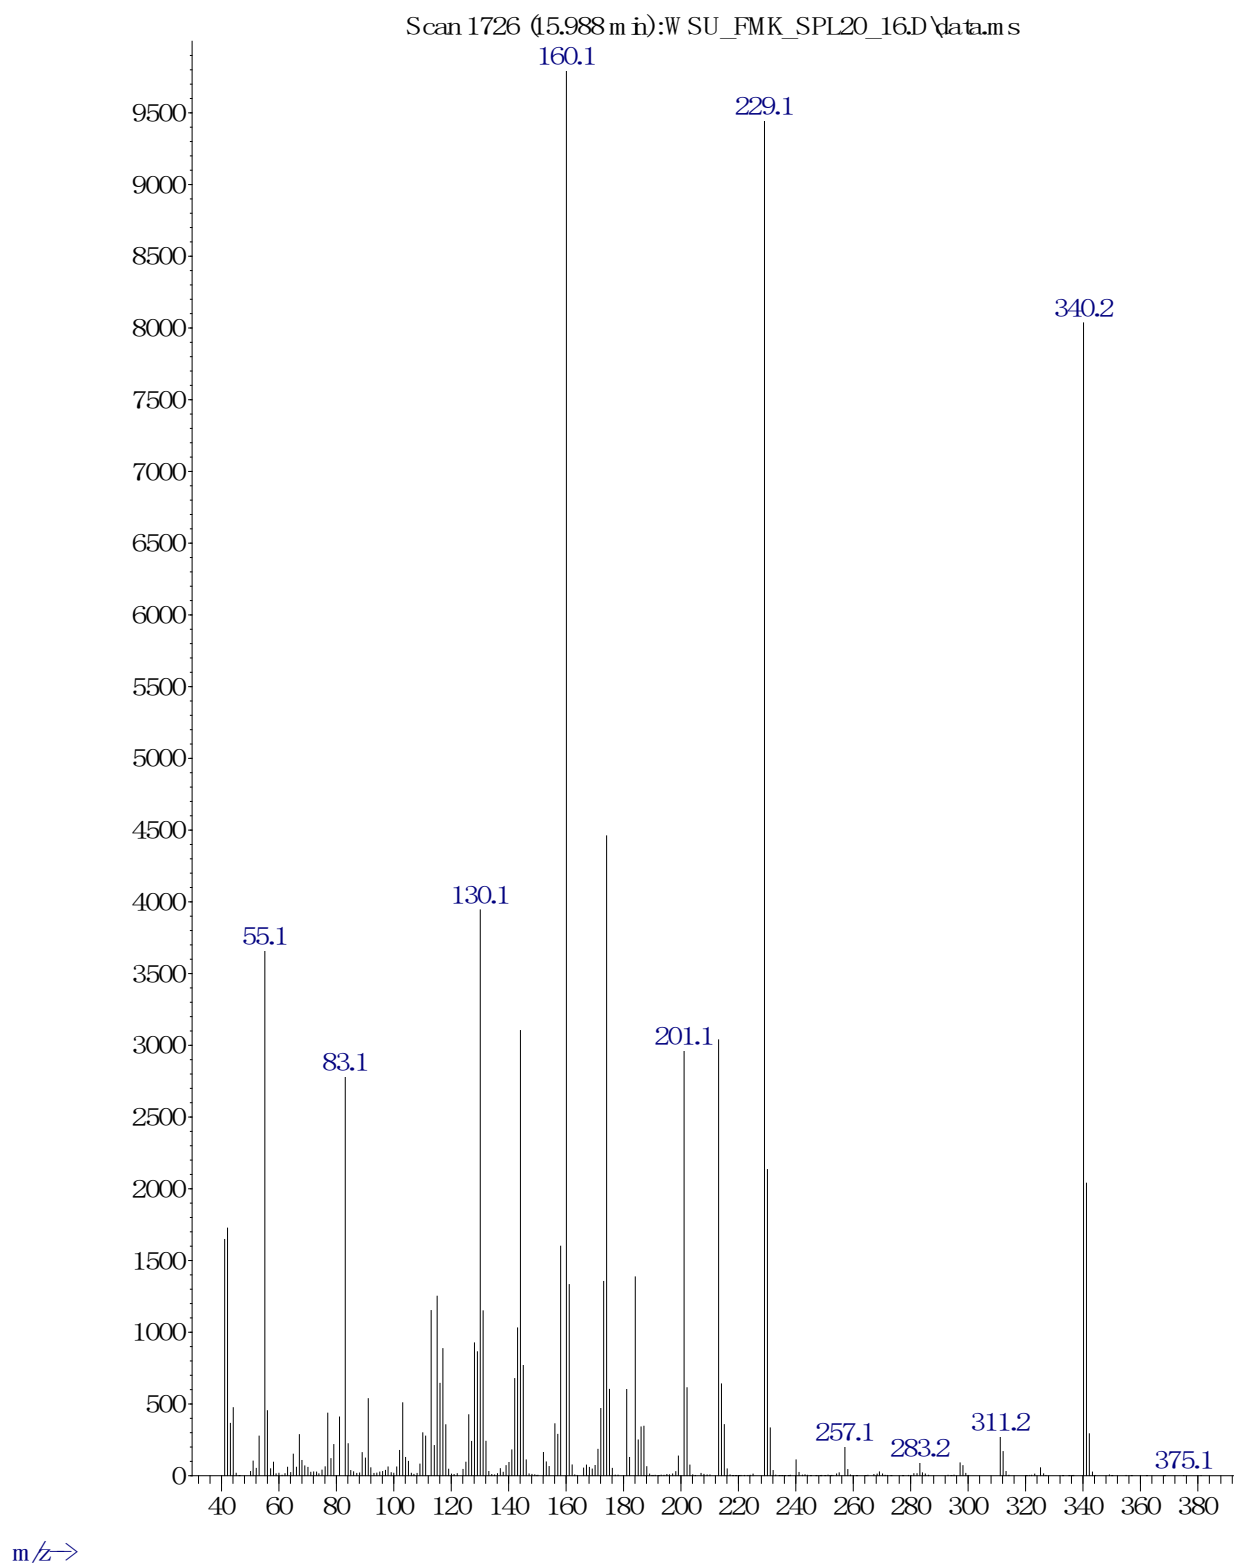

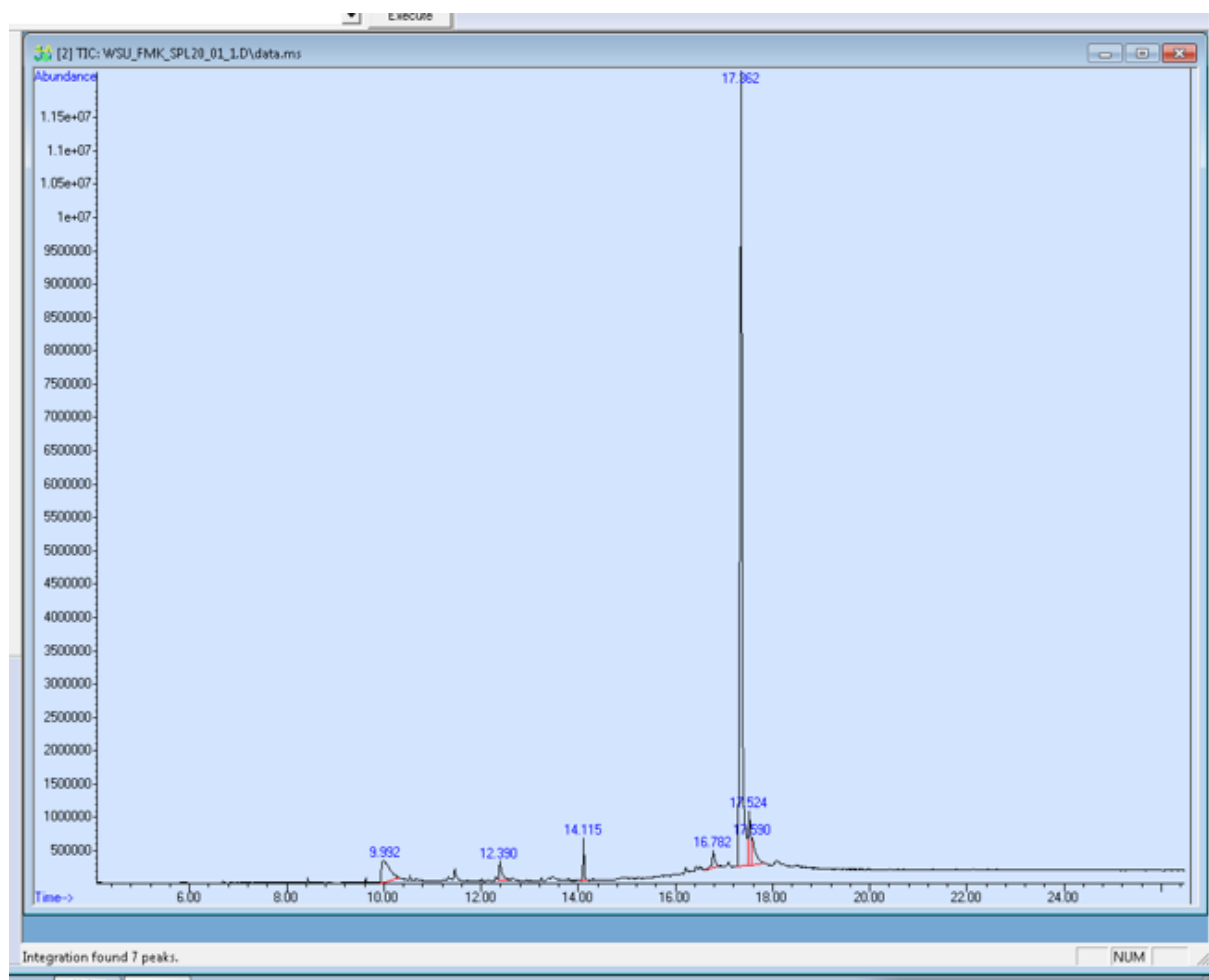Chromatograph of **24**

Abundance

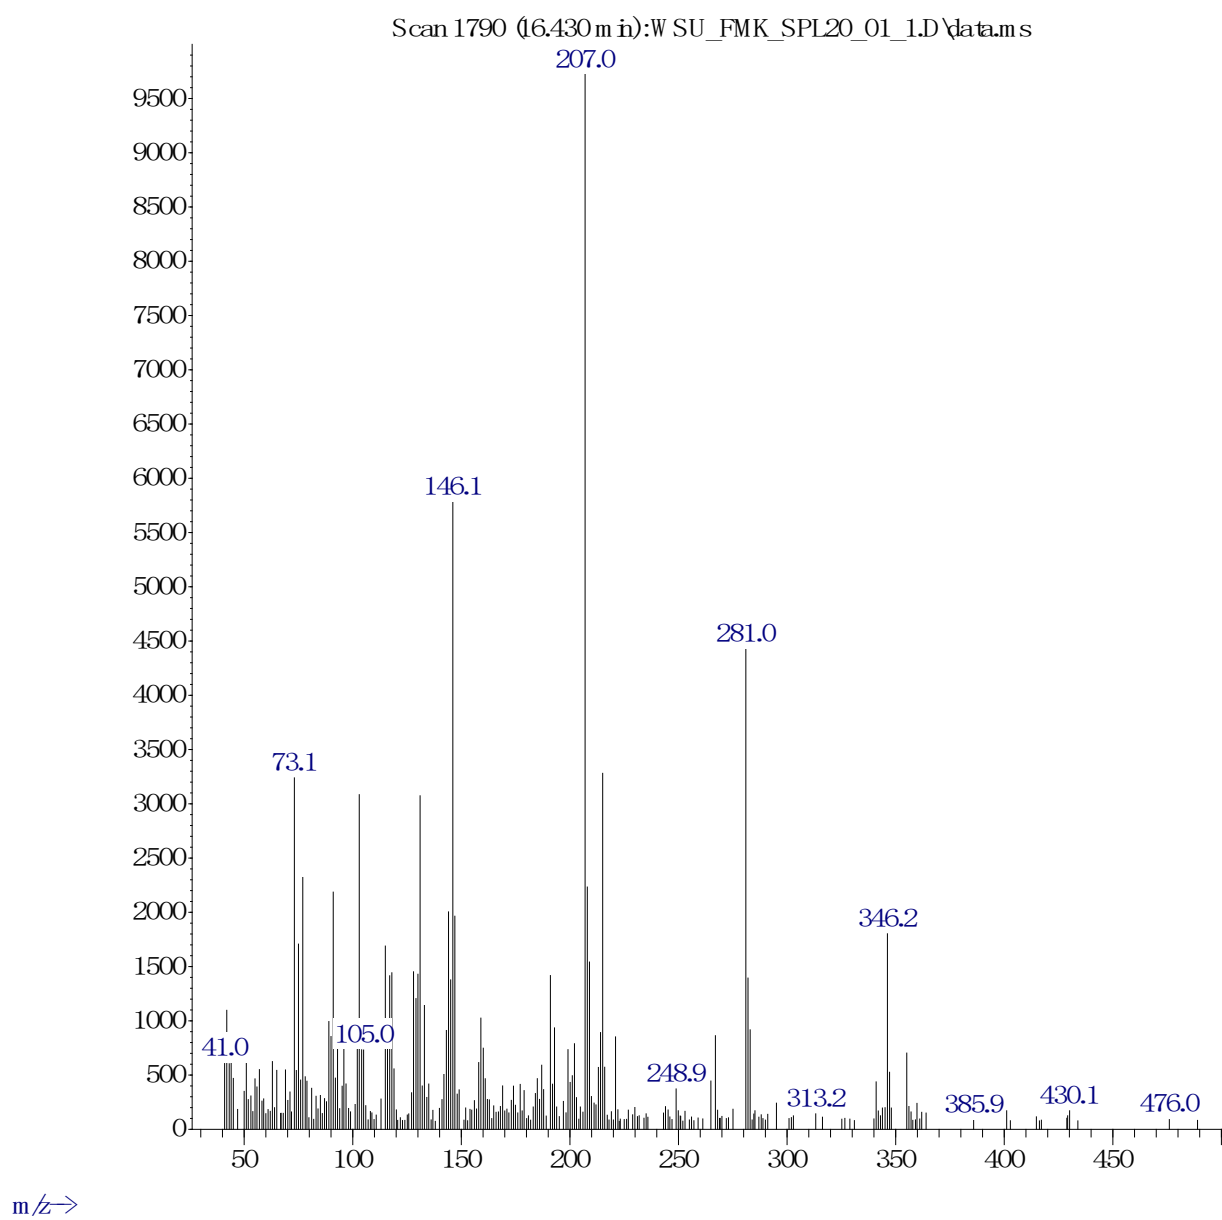Mass spectrum (m/z) of **24**

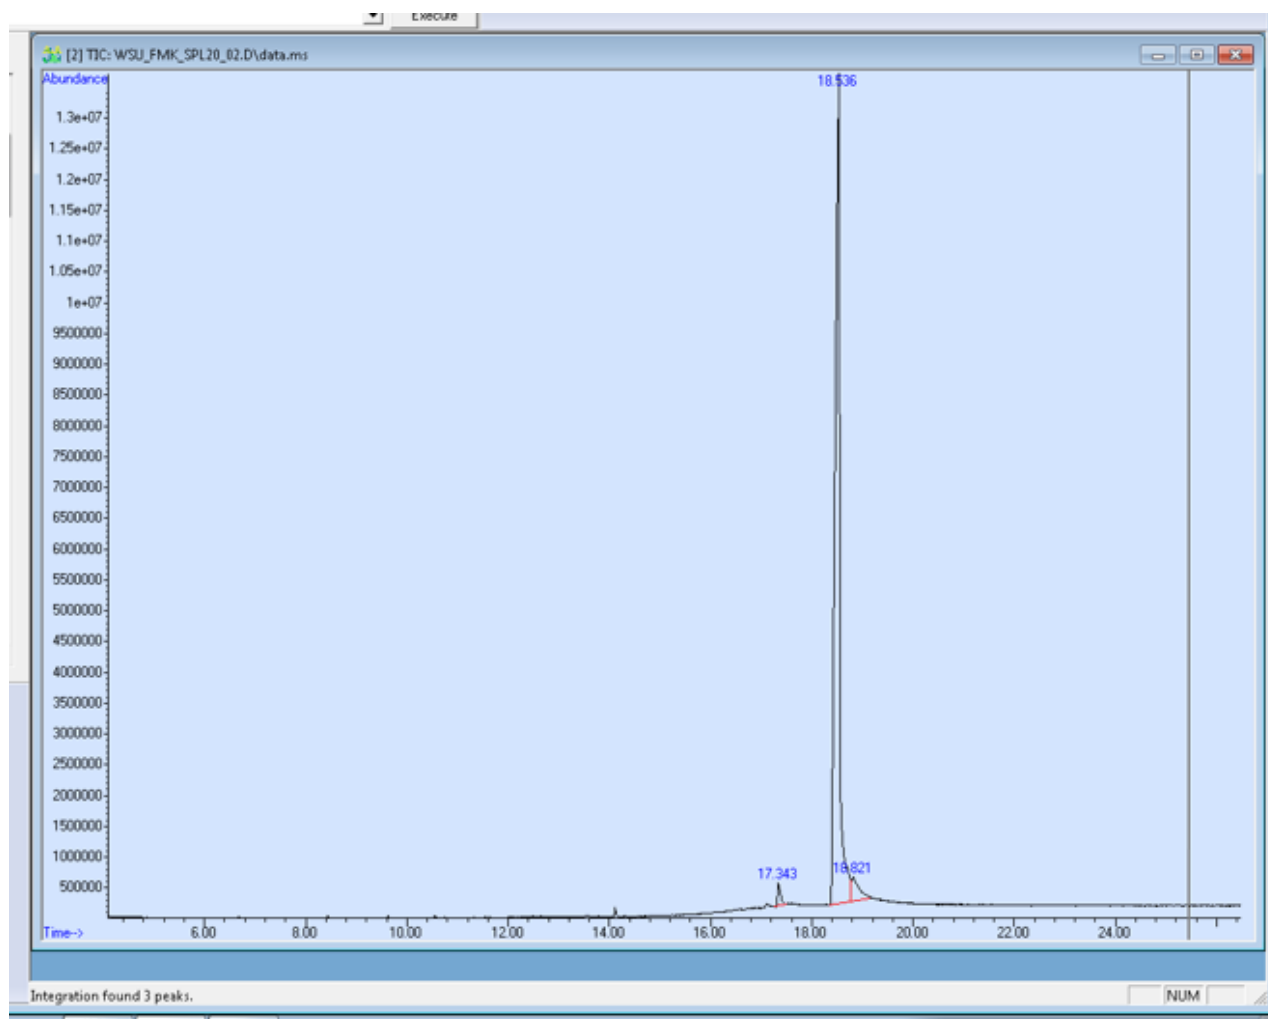

Chromatograph 25.



Abundance

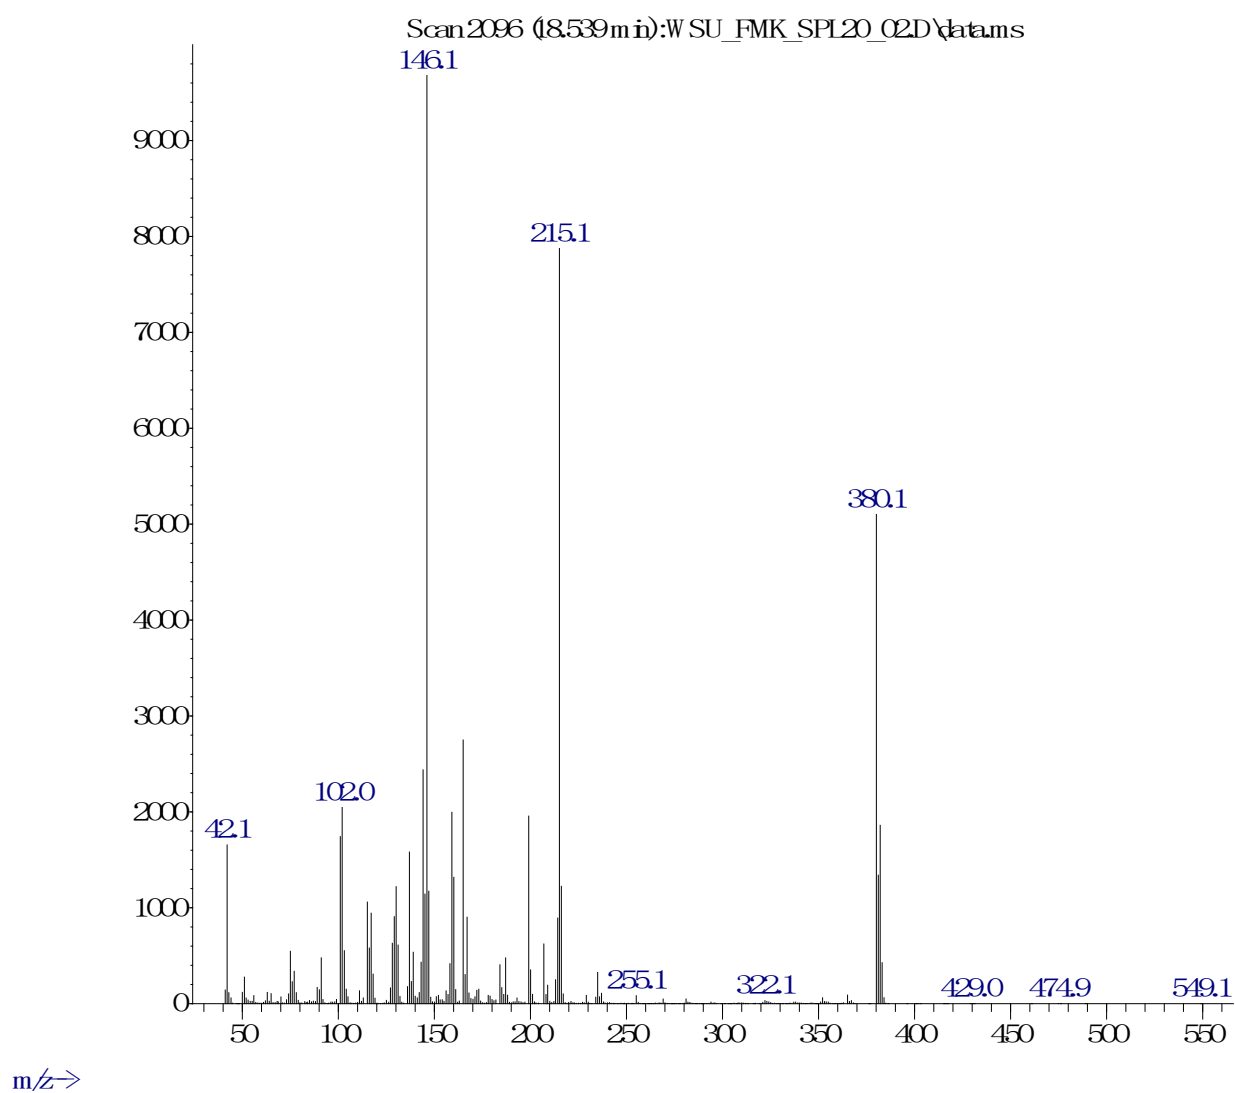

Mass spectrum (m/z) of 25.

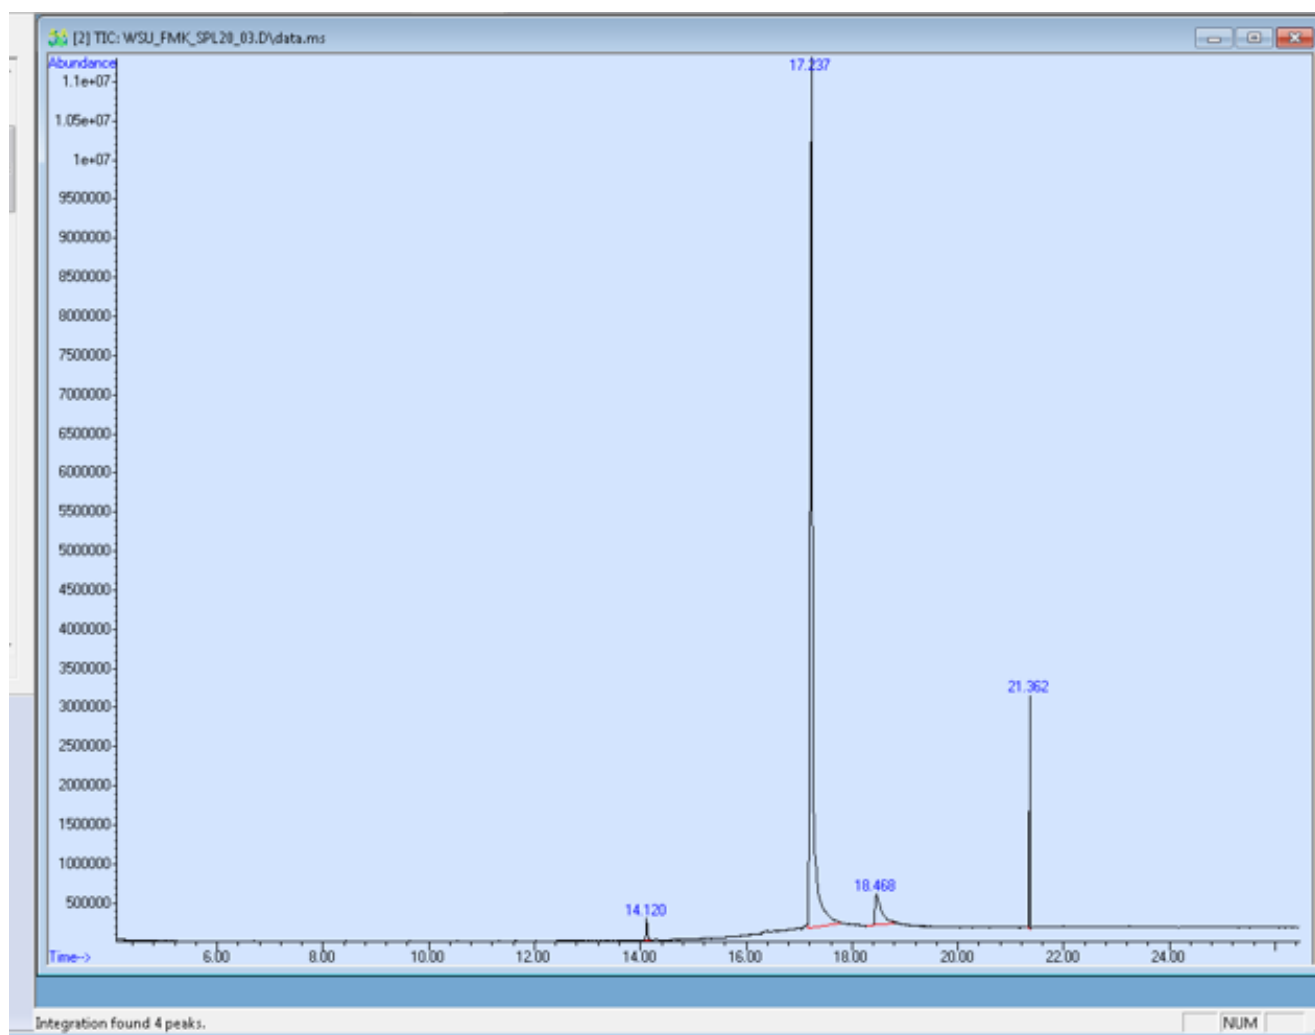GC Chromatogram of **26**.

Abundance

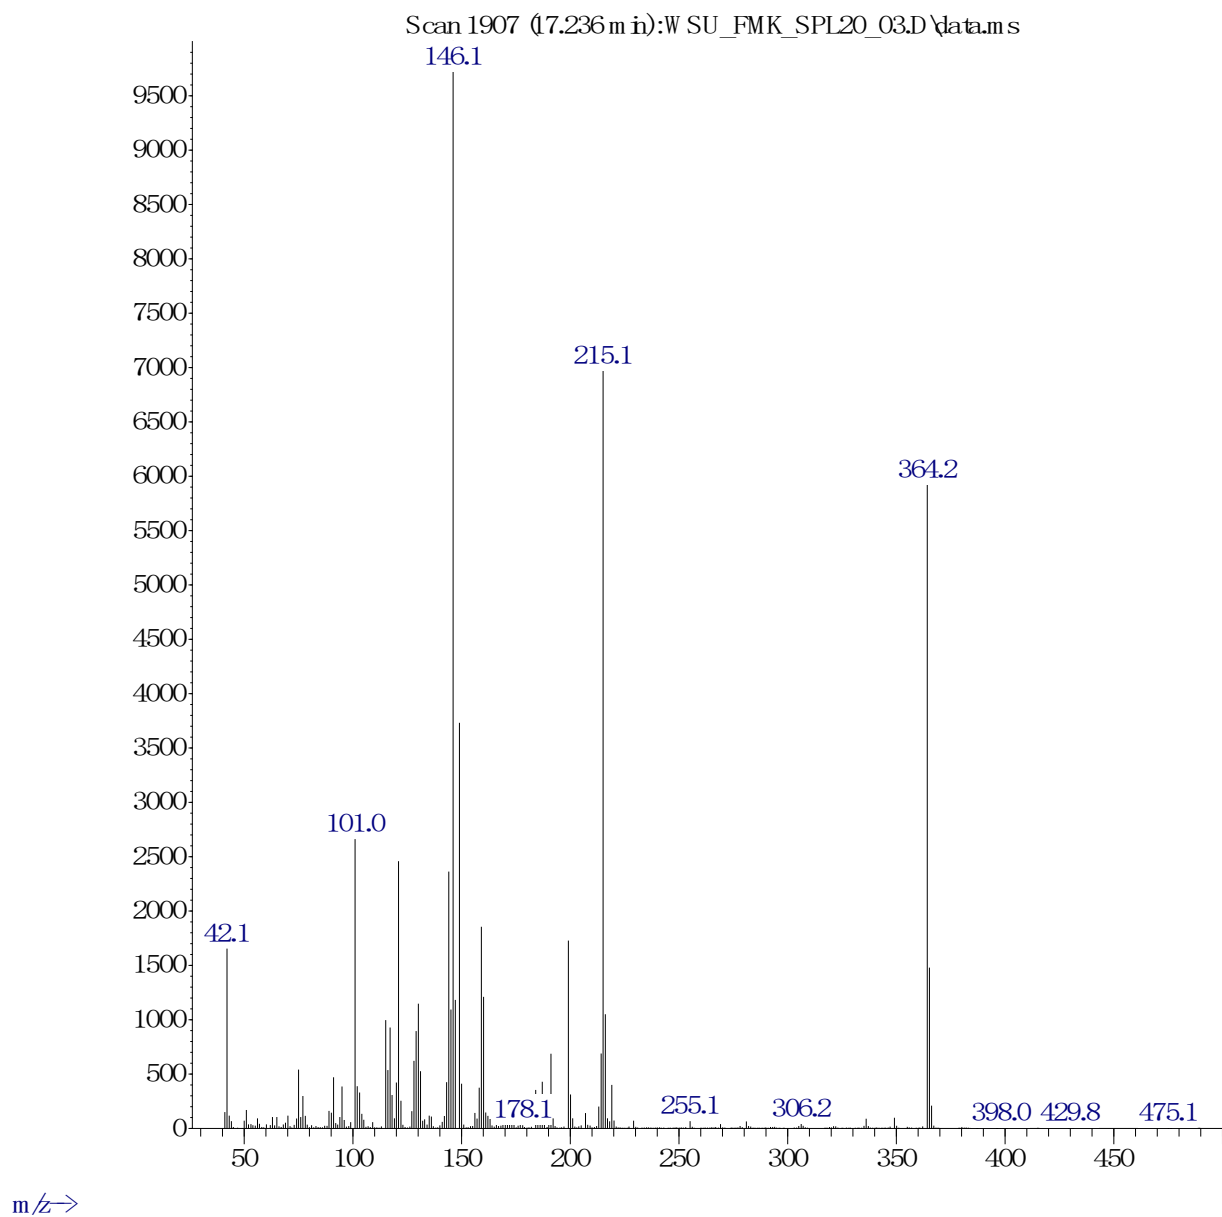Mass spectrum (m/z) of **26**.

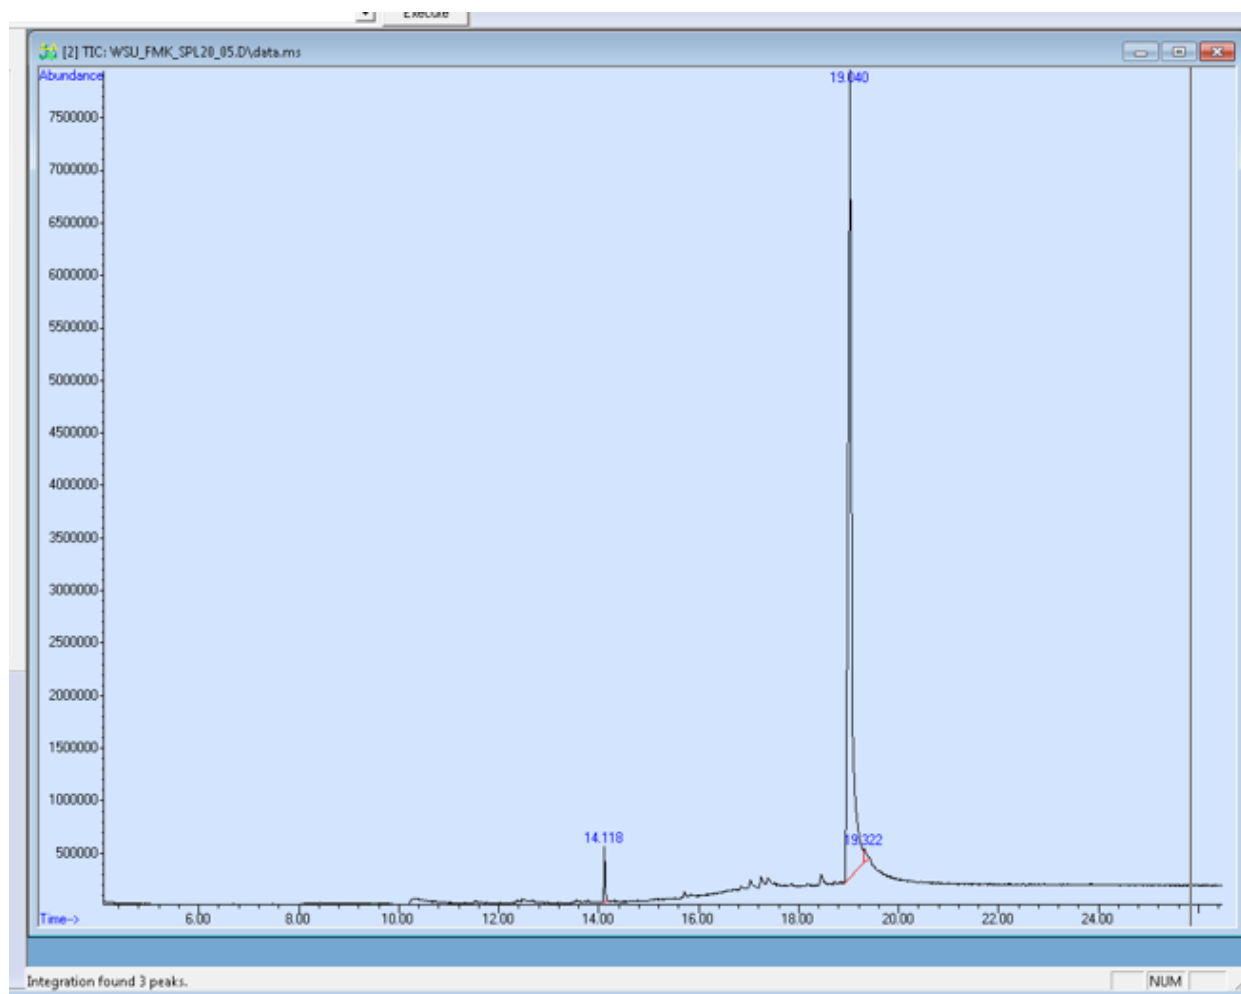Chromatogram of **27**.

Abundance

4838:2-acetyl-7-hydroxytetrahydroisoquinoline, 6,12-dioxo-1,7-diazabenzod[efimno]chrysene, 1,7-diacetyl-1,2,3,6a,7,

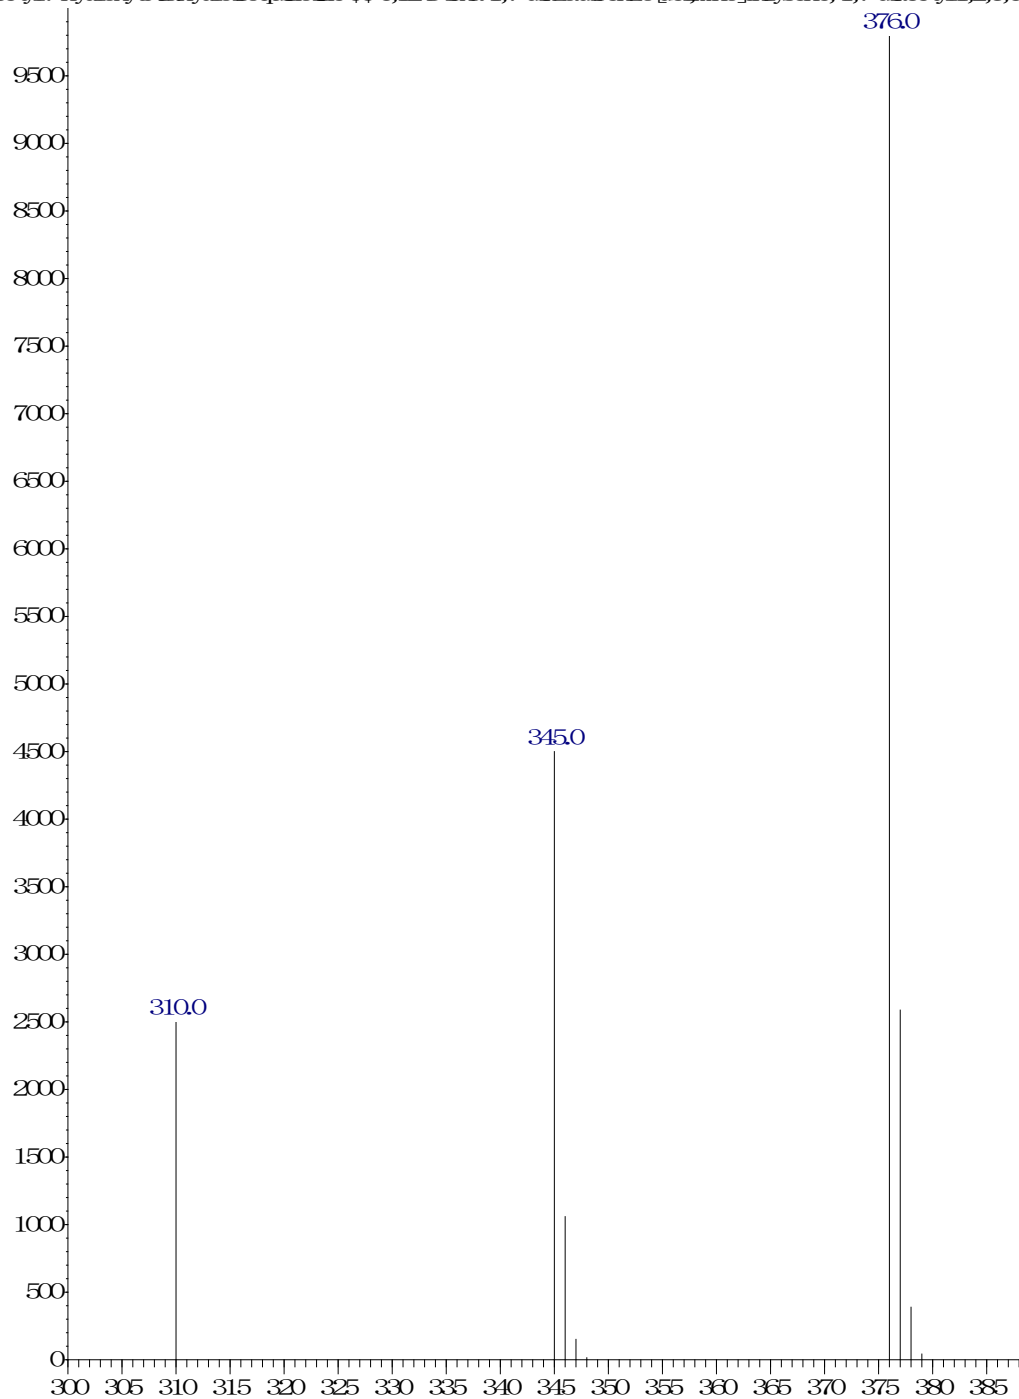

m/z→

Mass spectrum (m/z) of 27.

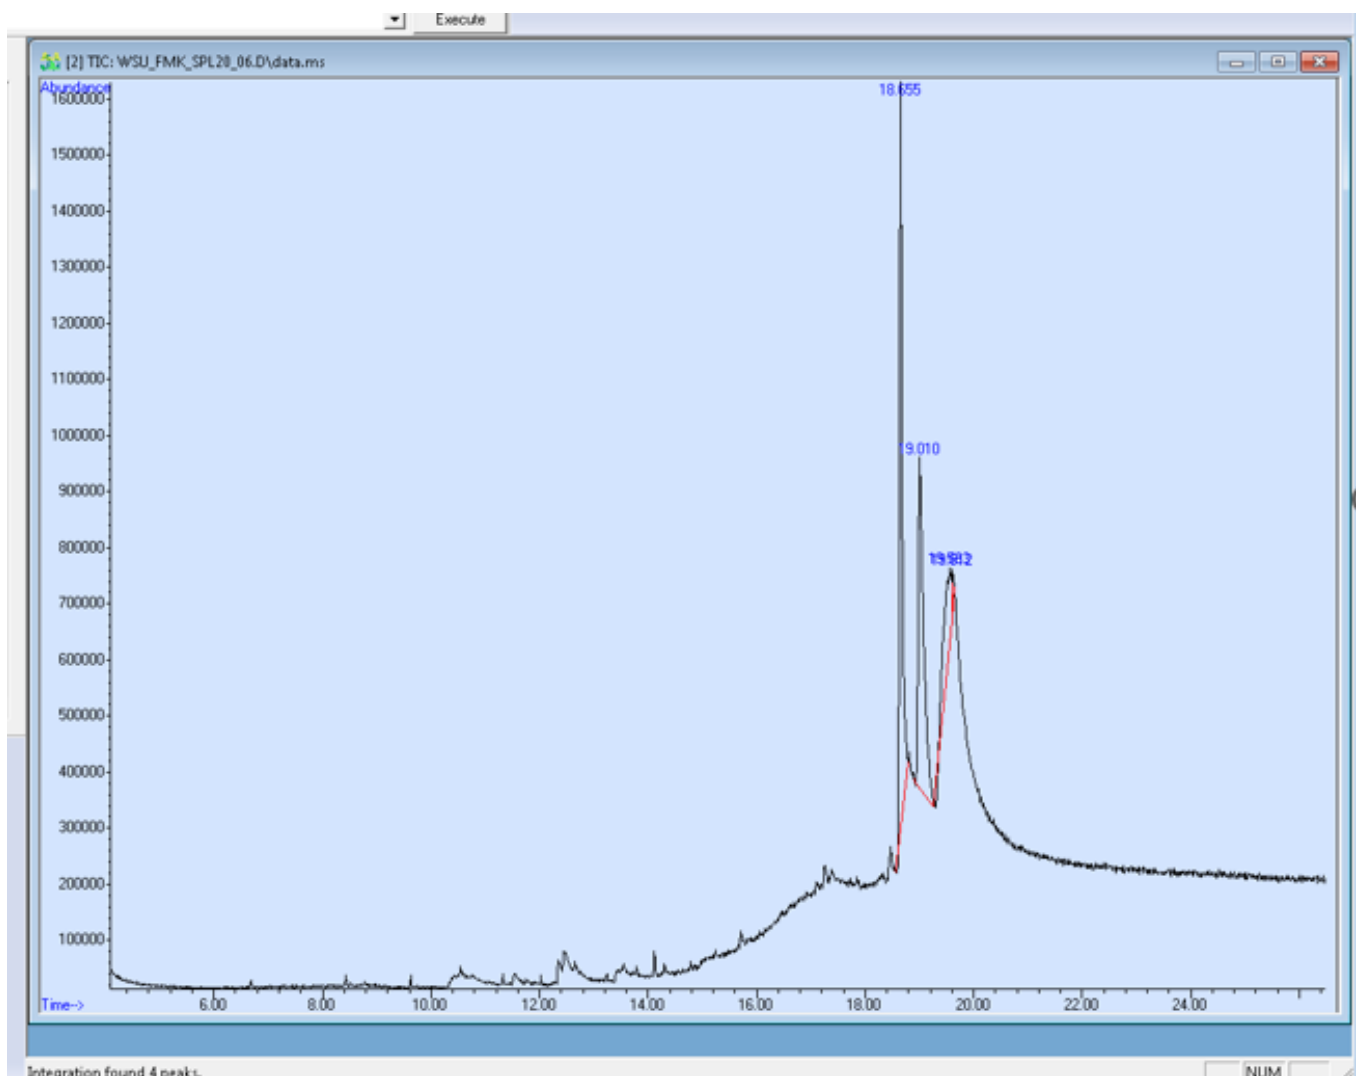Chromatograph of **28**.

Abundance

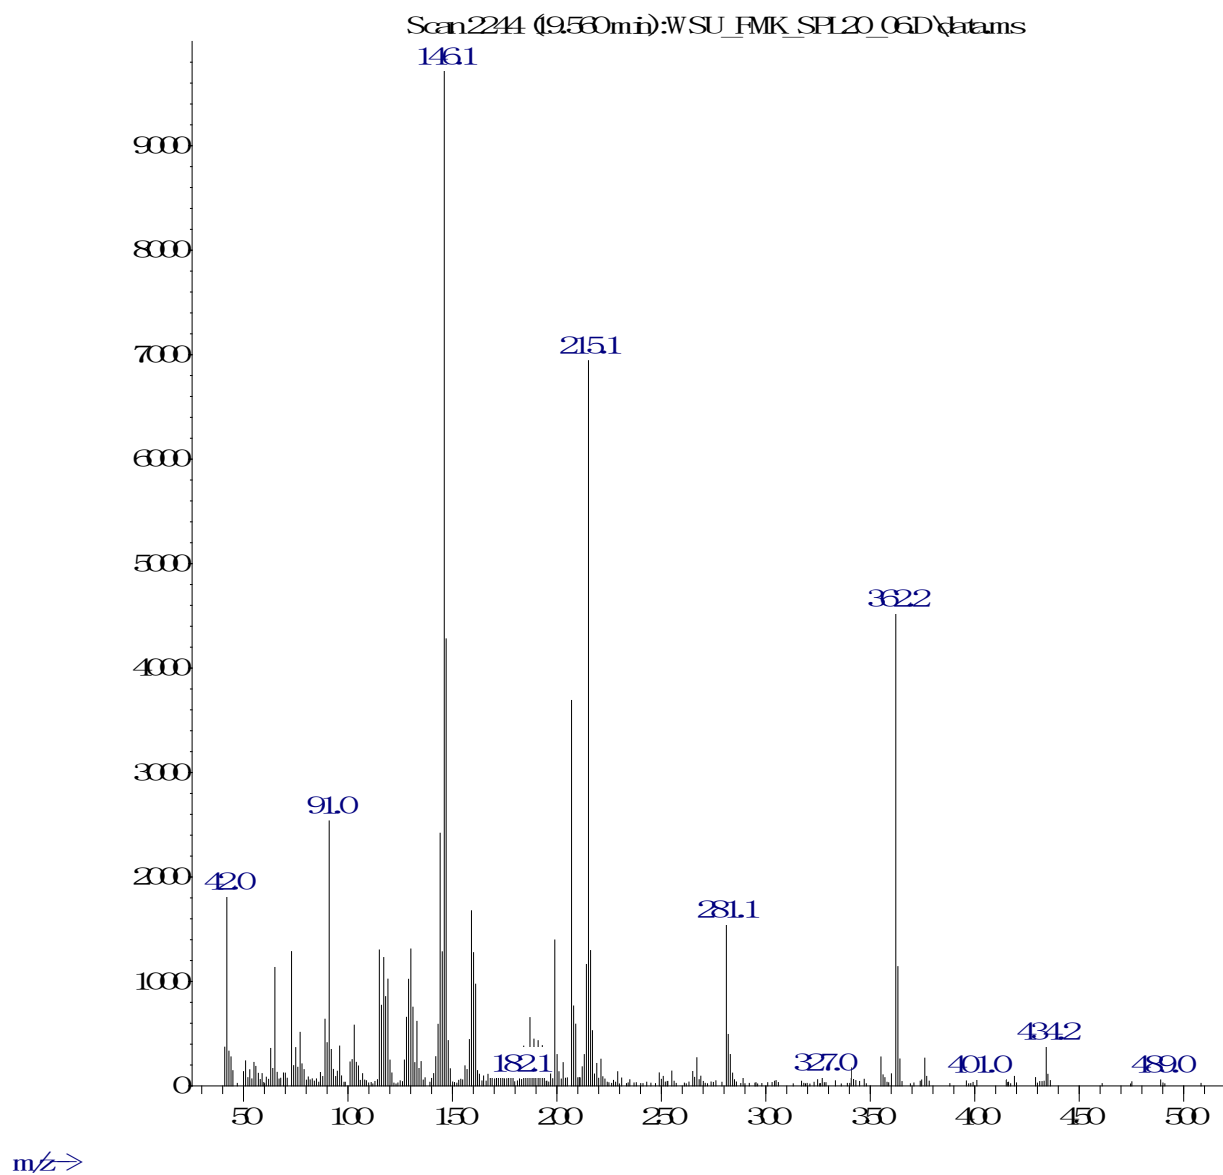Mass spectrum (m/z) of **28**.

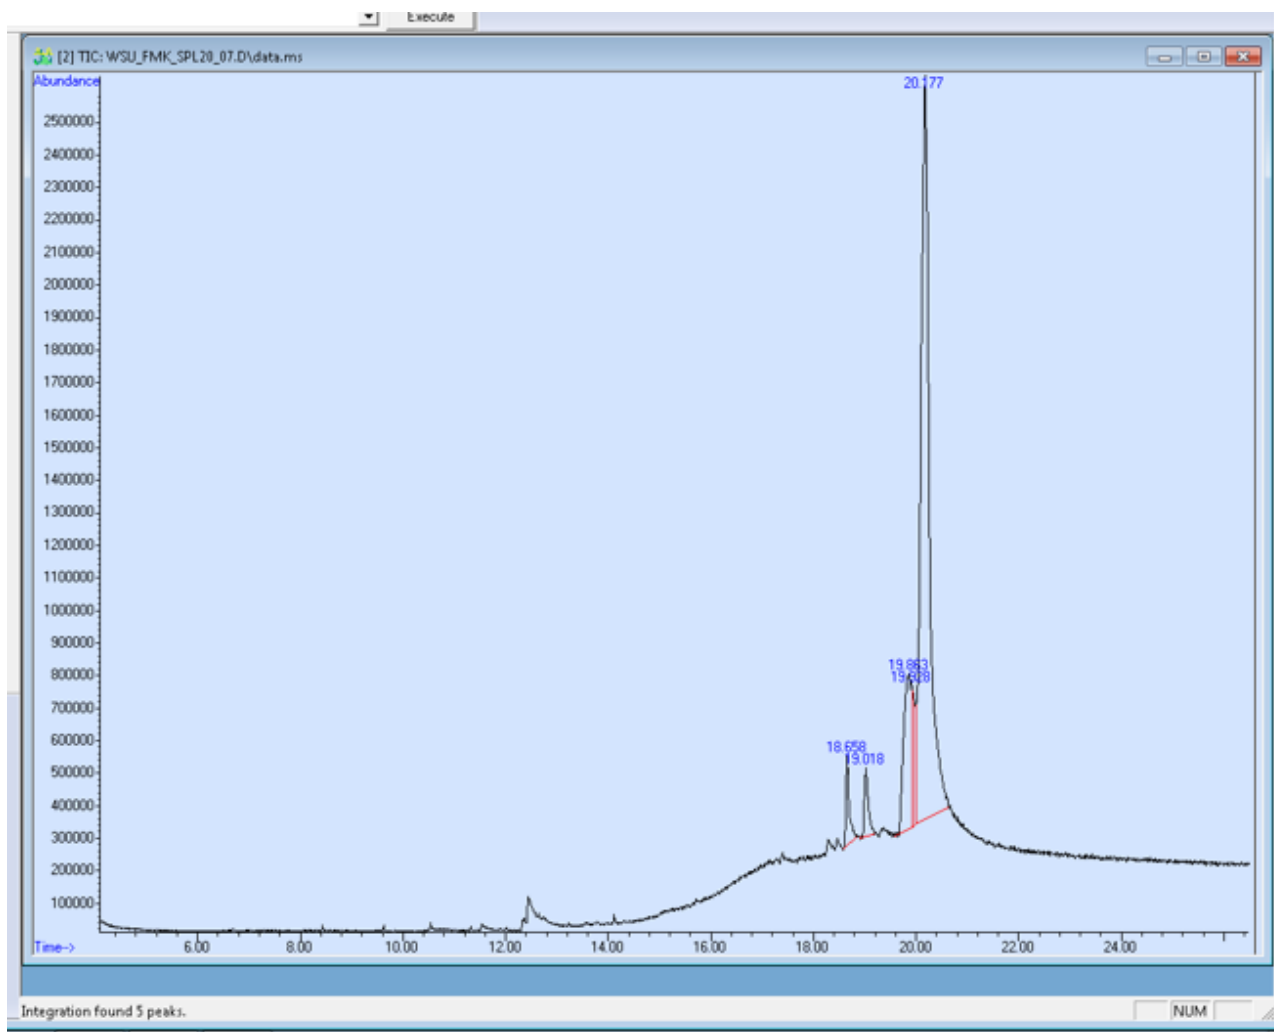Chromatogram of **29**.



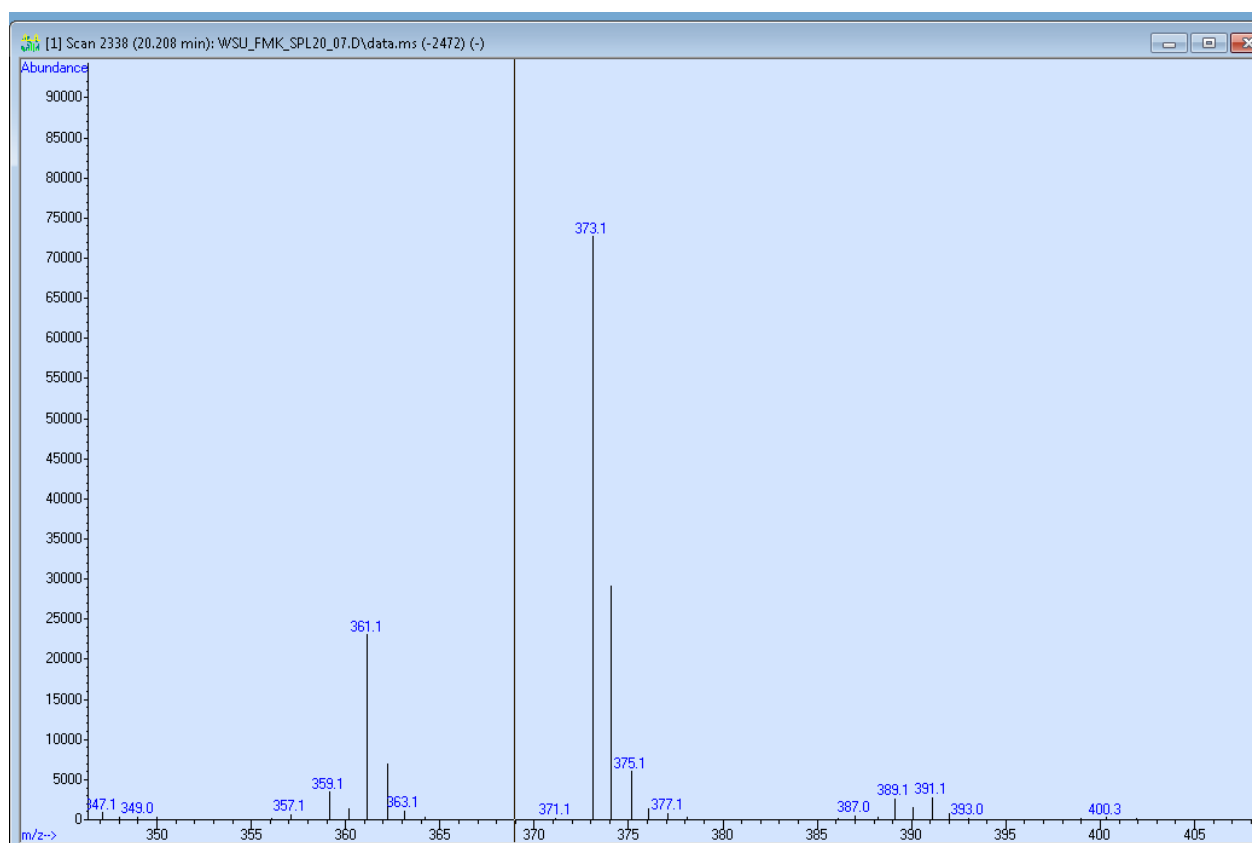

Mass spectrum (m/z) of **29**.

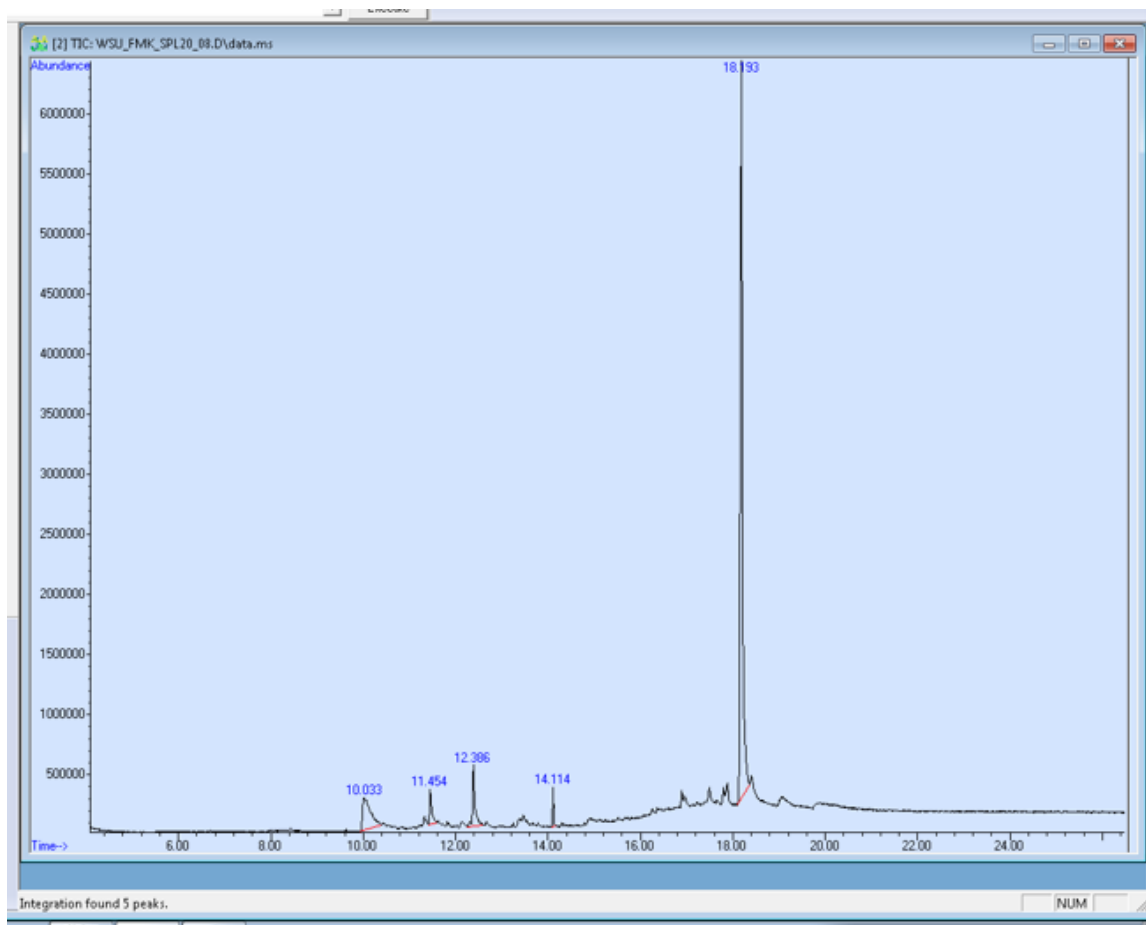Chromatograph of **30**.

Abundance

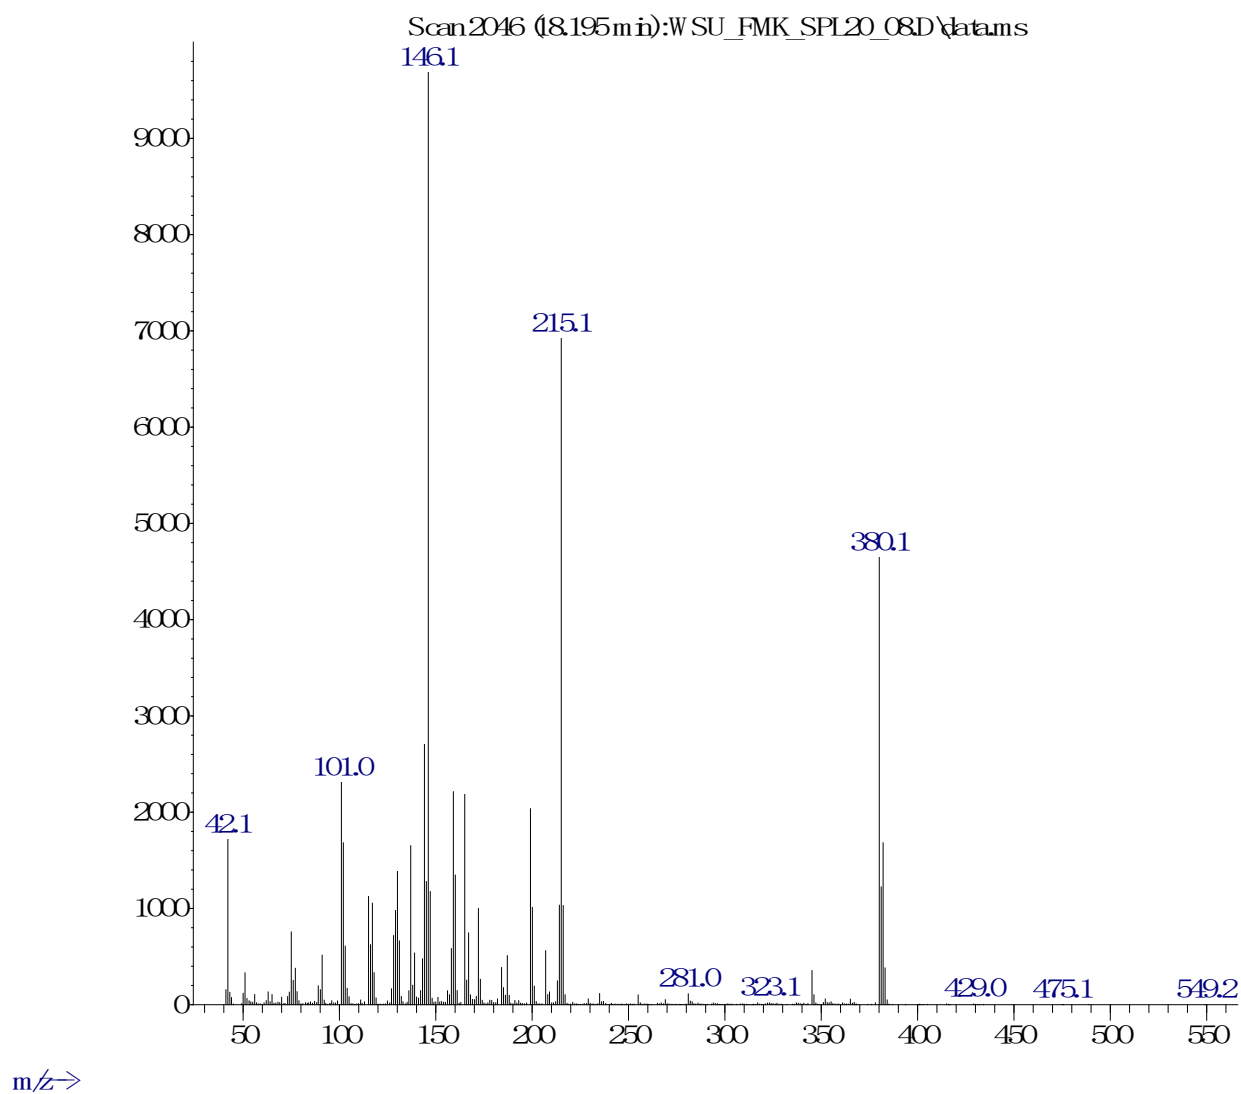Mass spectrum (m/z) of **30**.

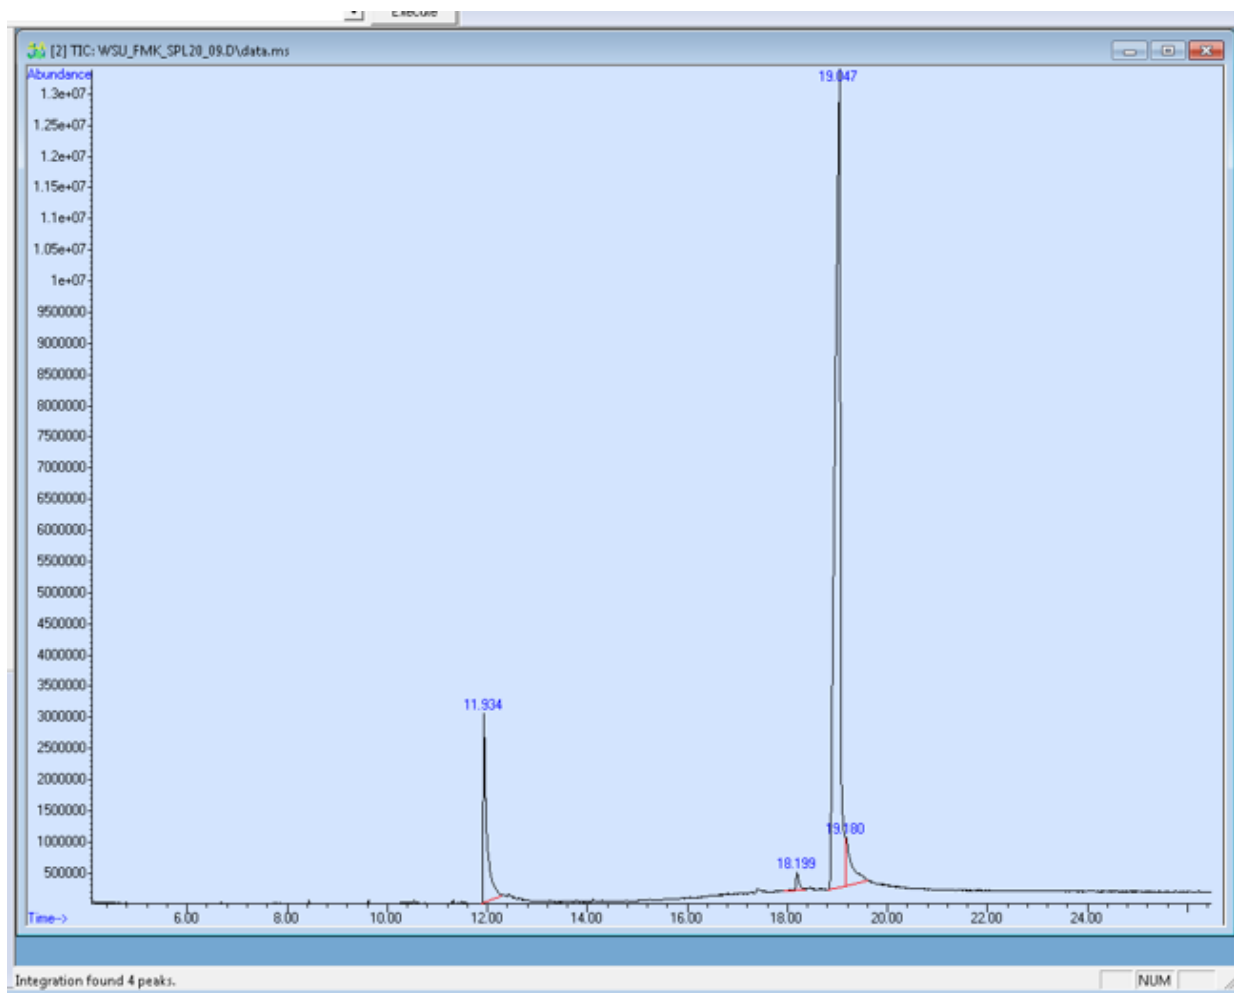Chromatogram of **31**.

Abundance

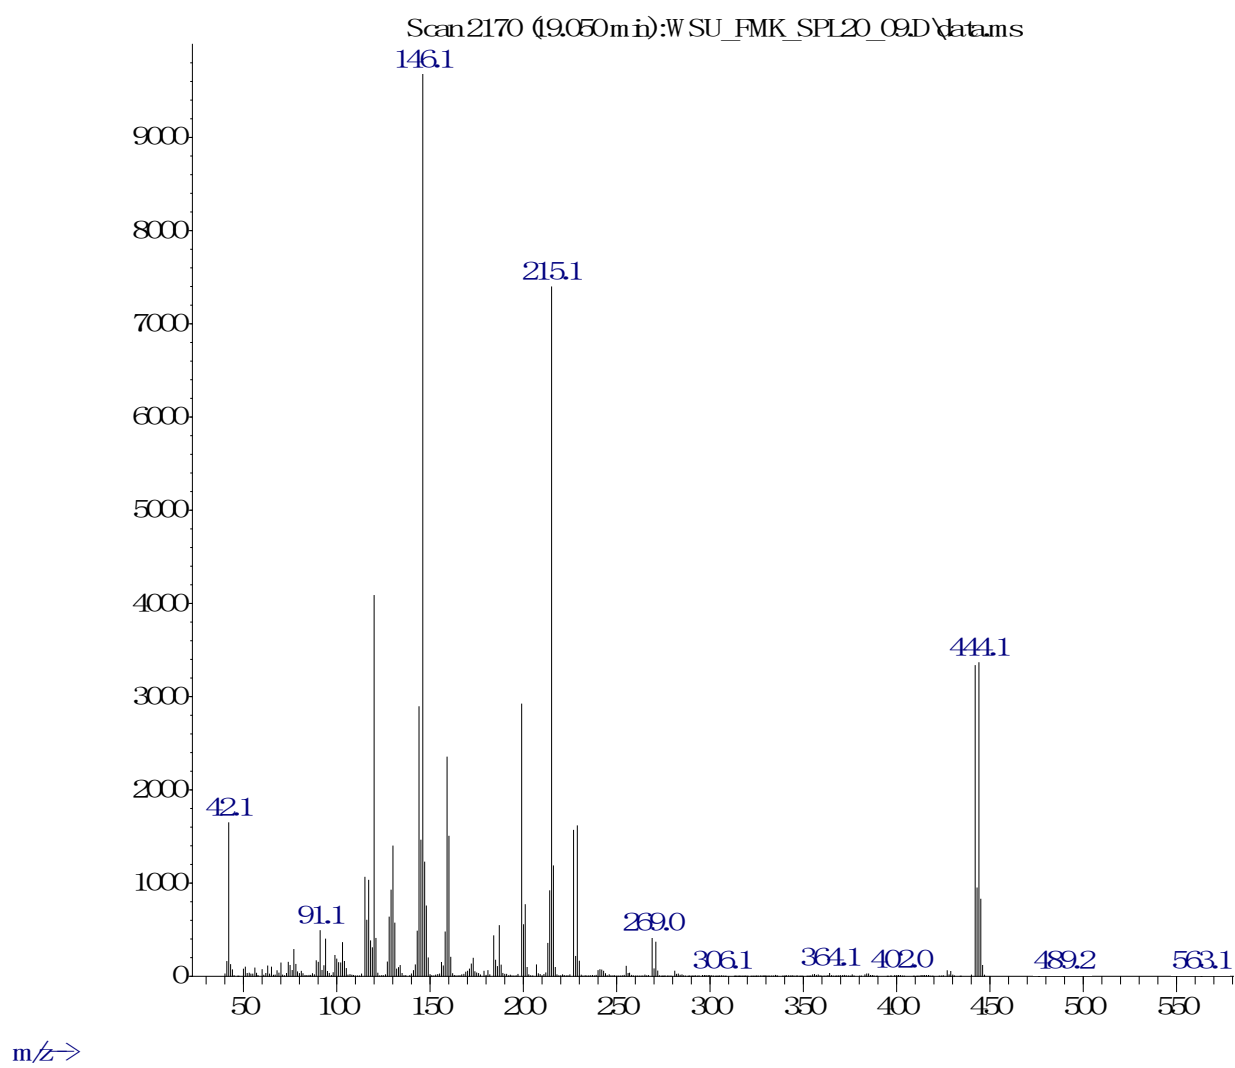Mass spectrum (m/z) of **31**.

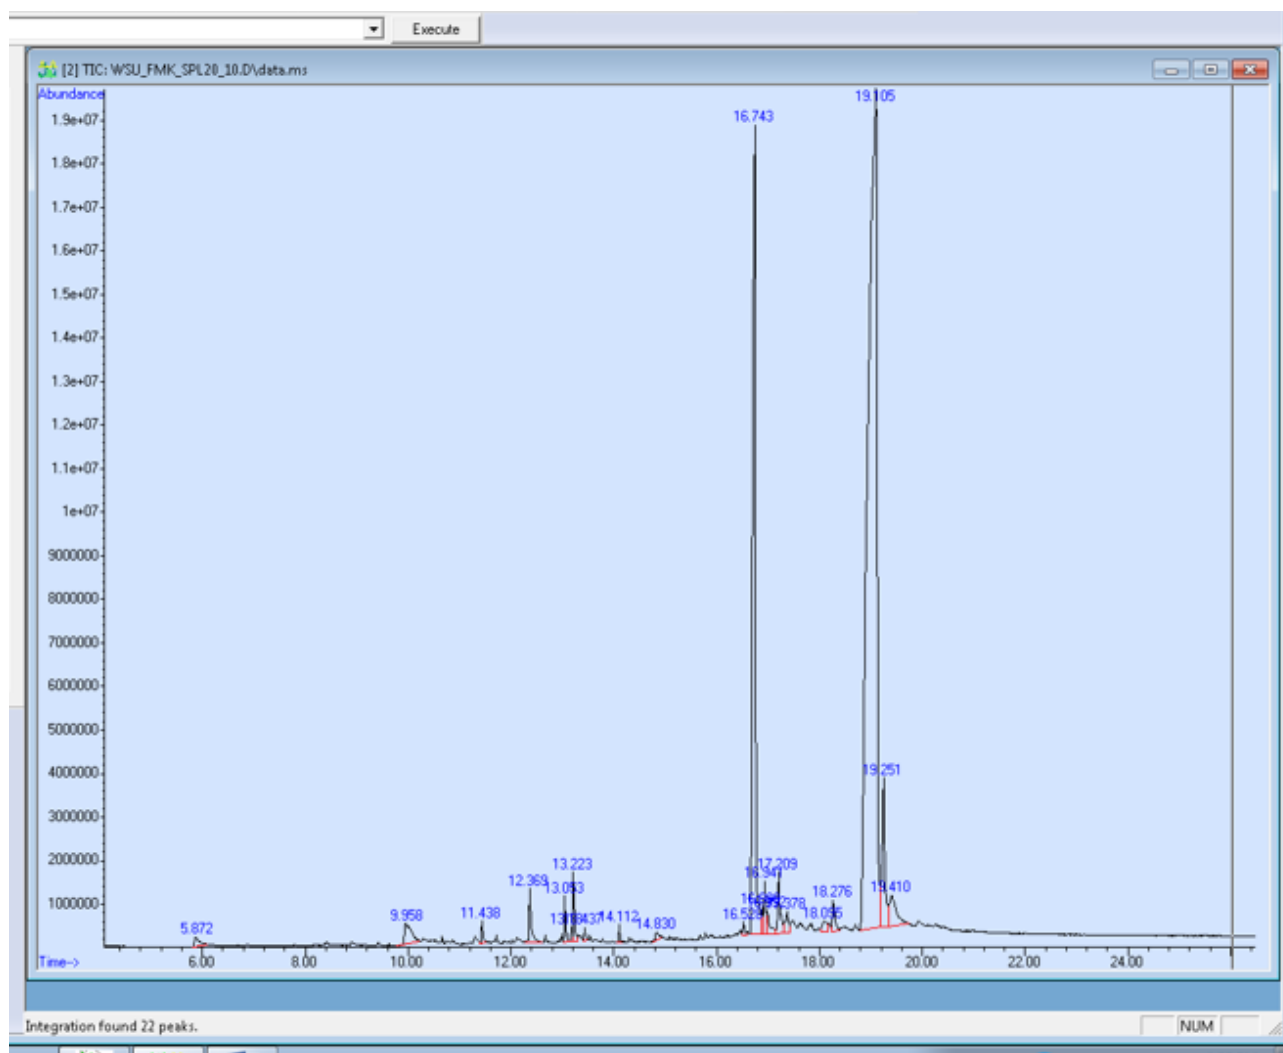Chromatograph of **32**.

Abundance

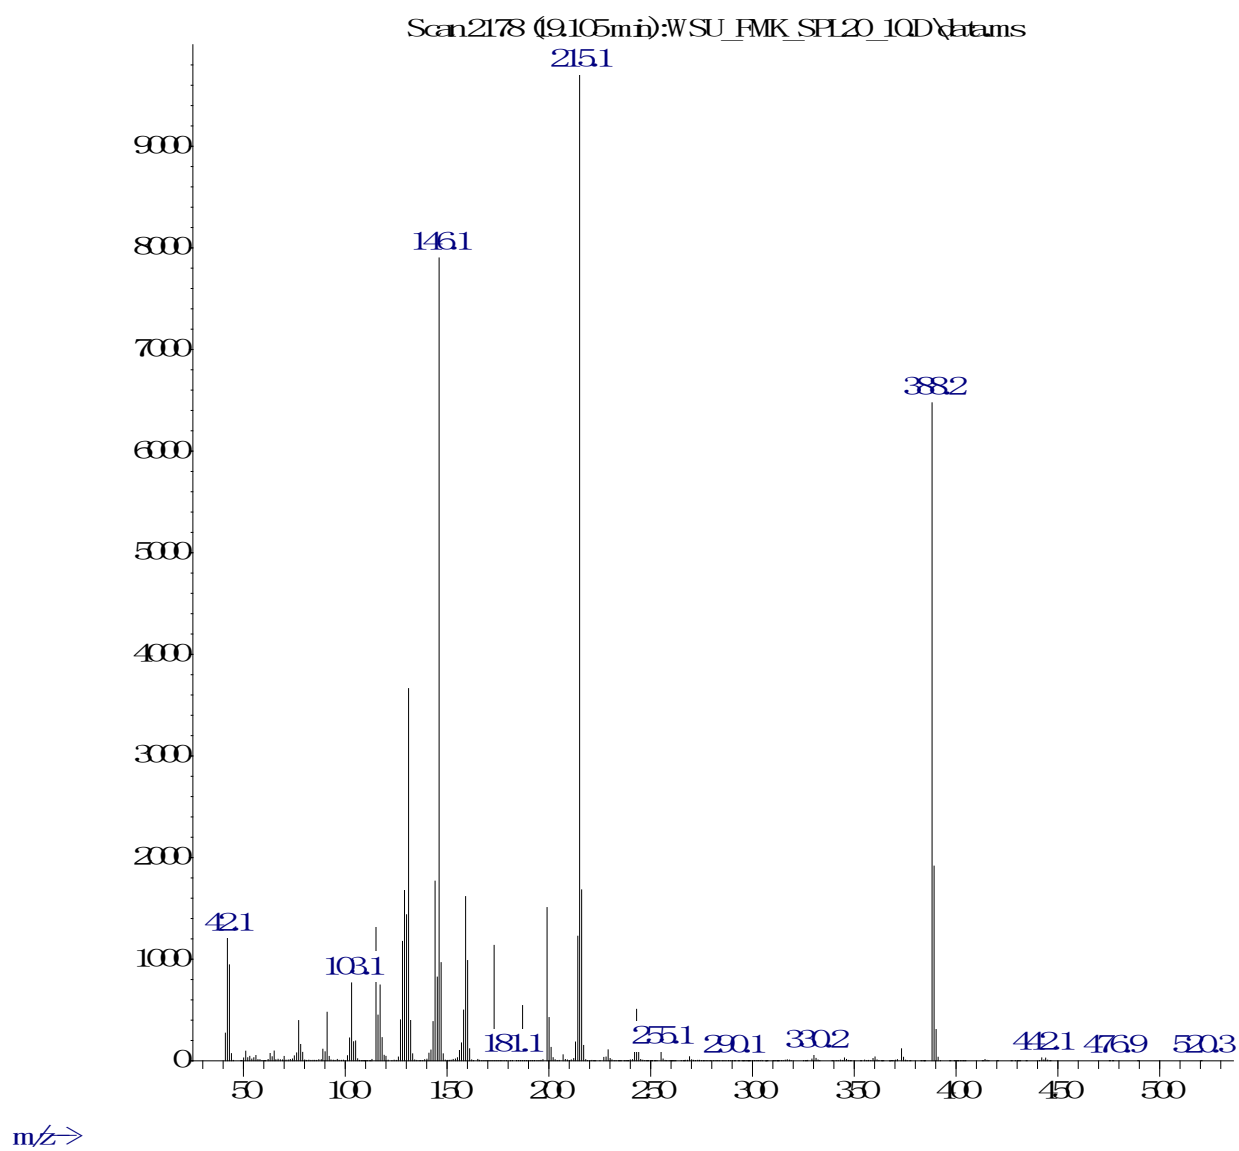Mass spectrum (m/z) of **32**.

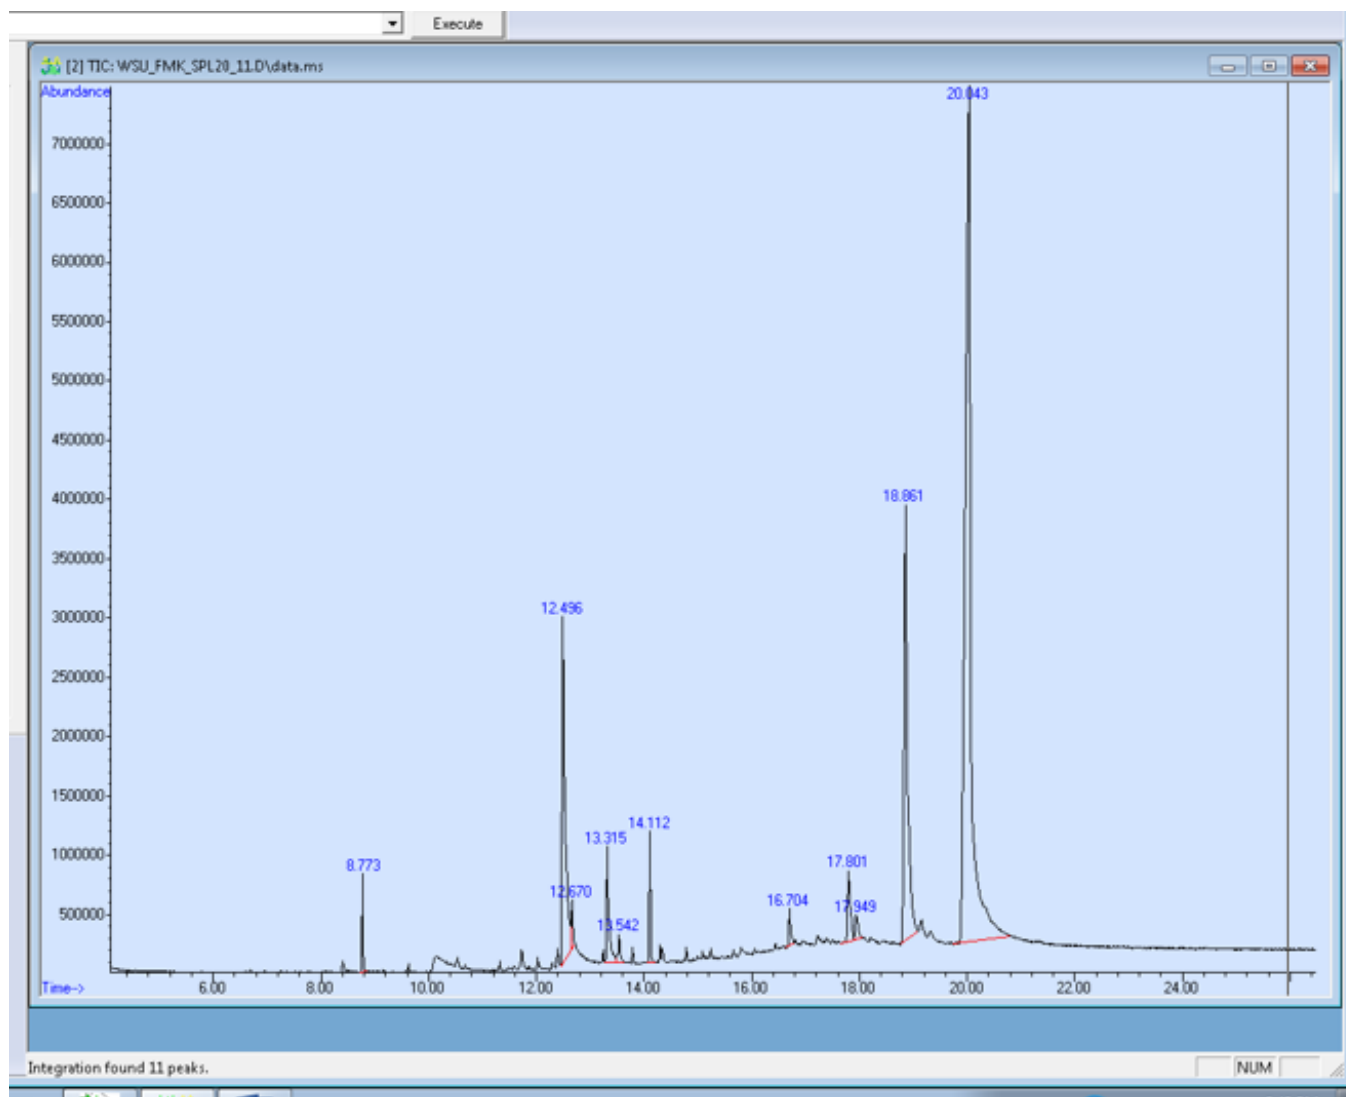Chromatograph of **33**.



Abundance

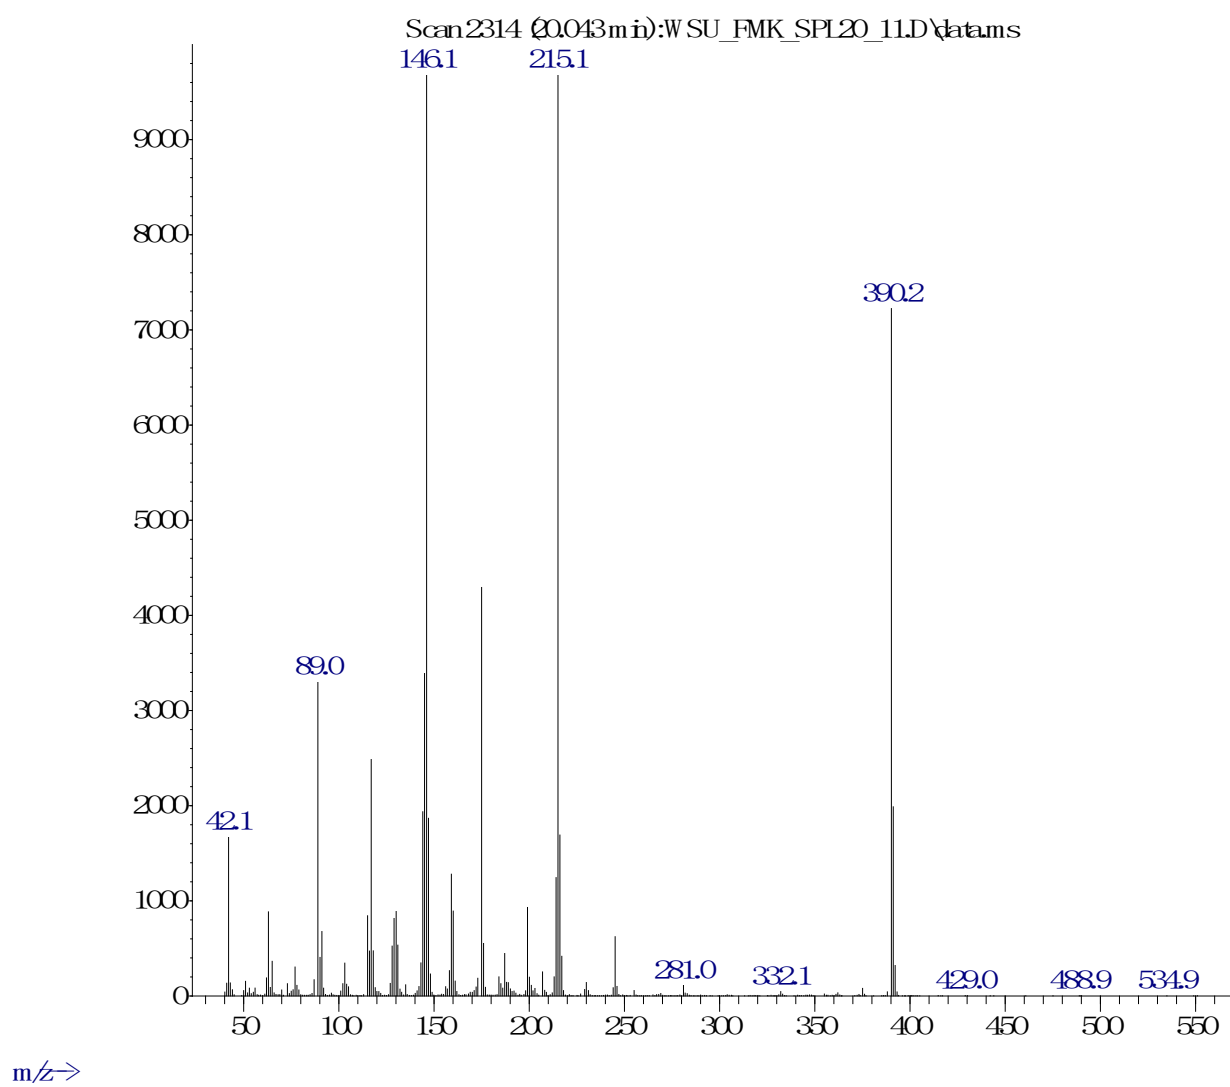

Mass spectrum (m/z) of 33.

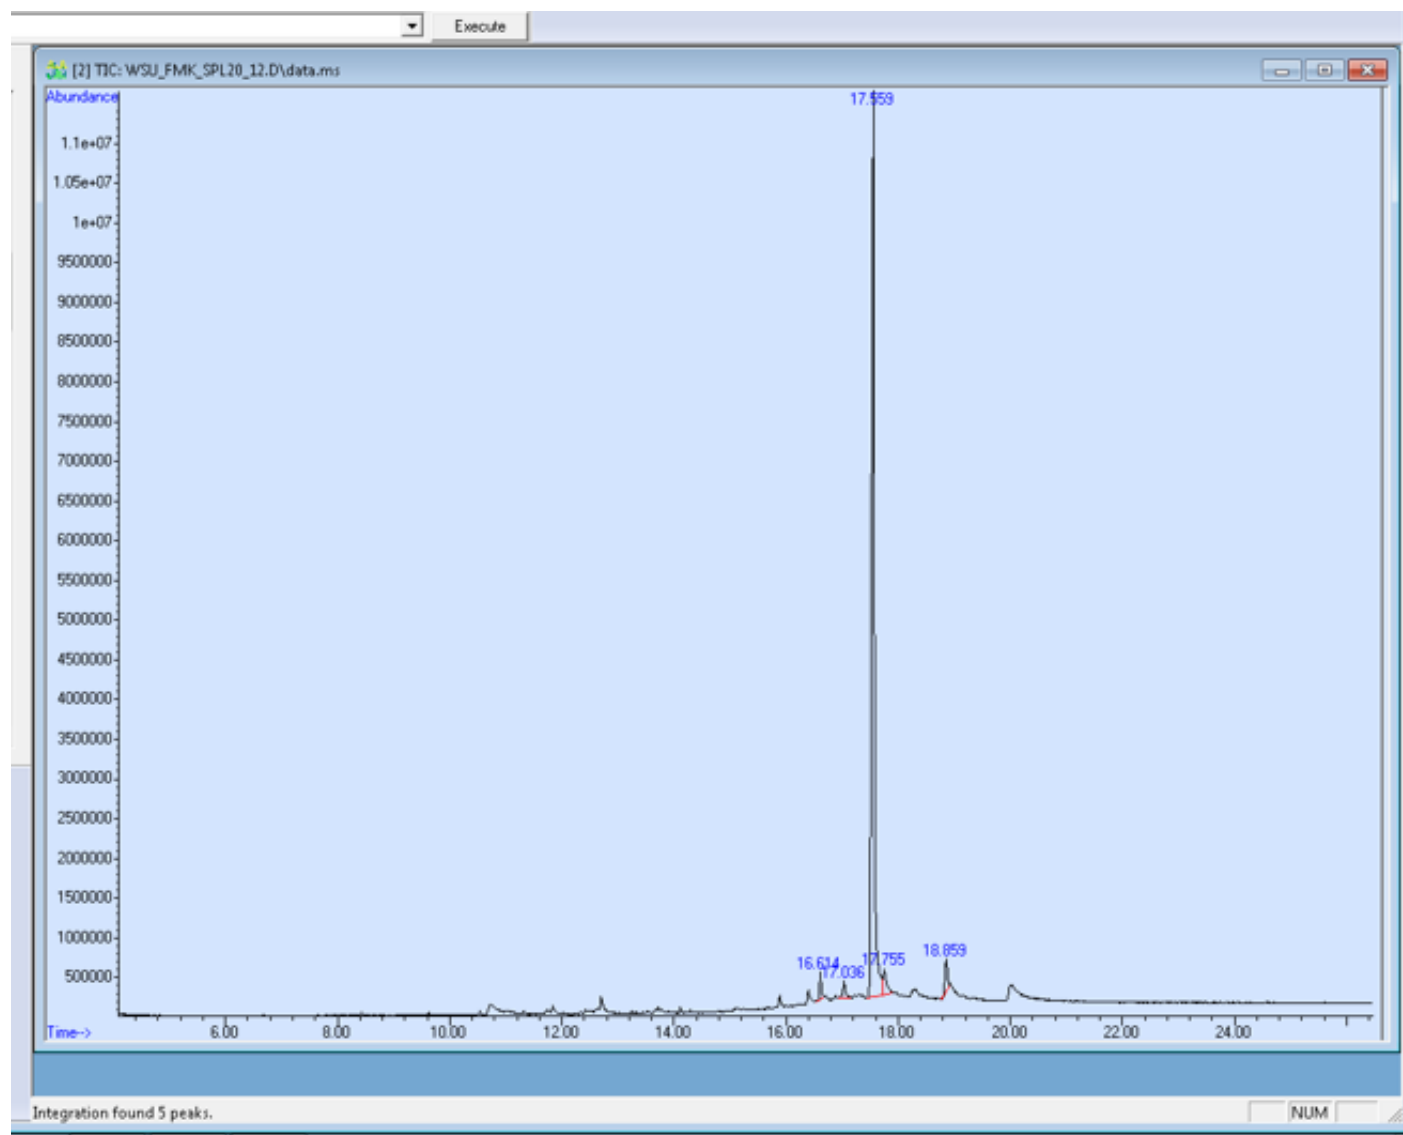Chromatograph of **34**.

Abundance

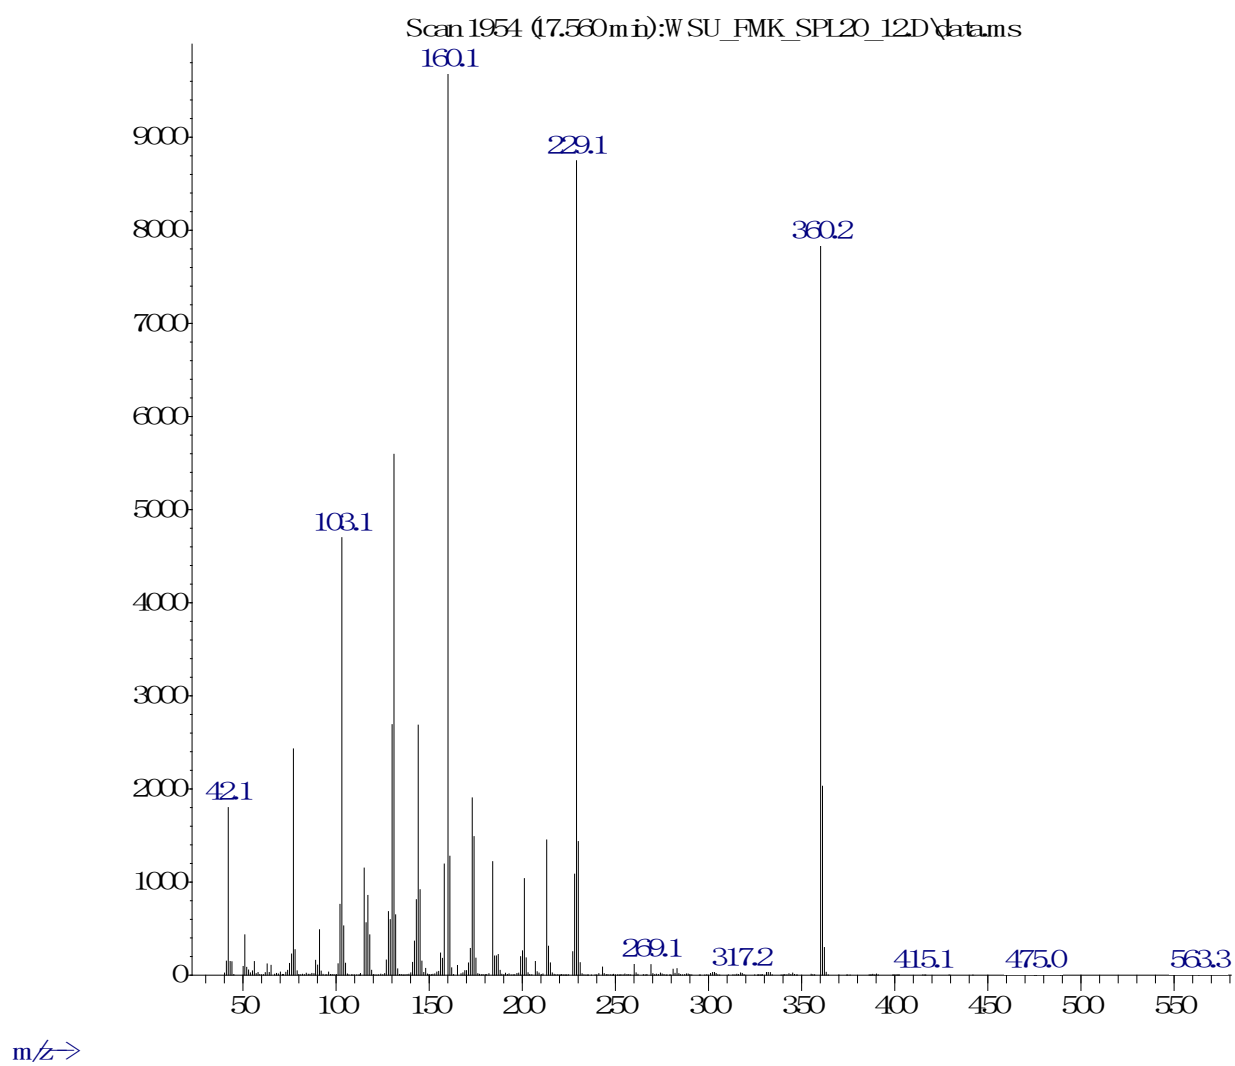Mass spectrum (m/z) of **34**.

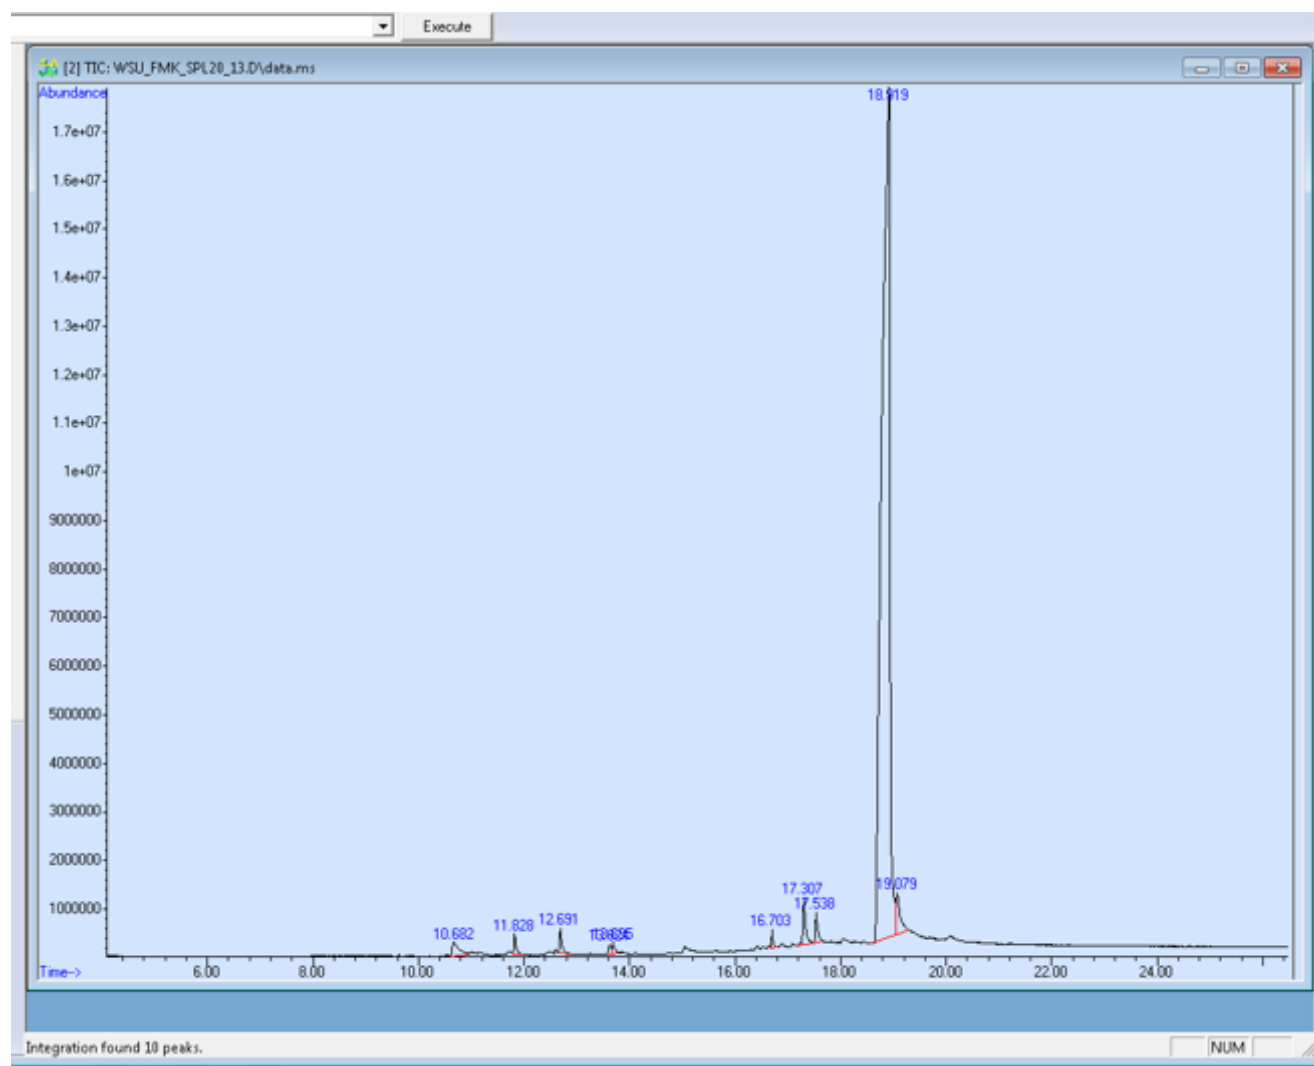Chromatograph of **35**.

Abundance

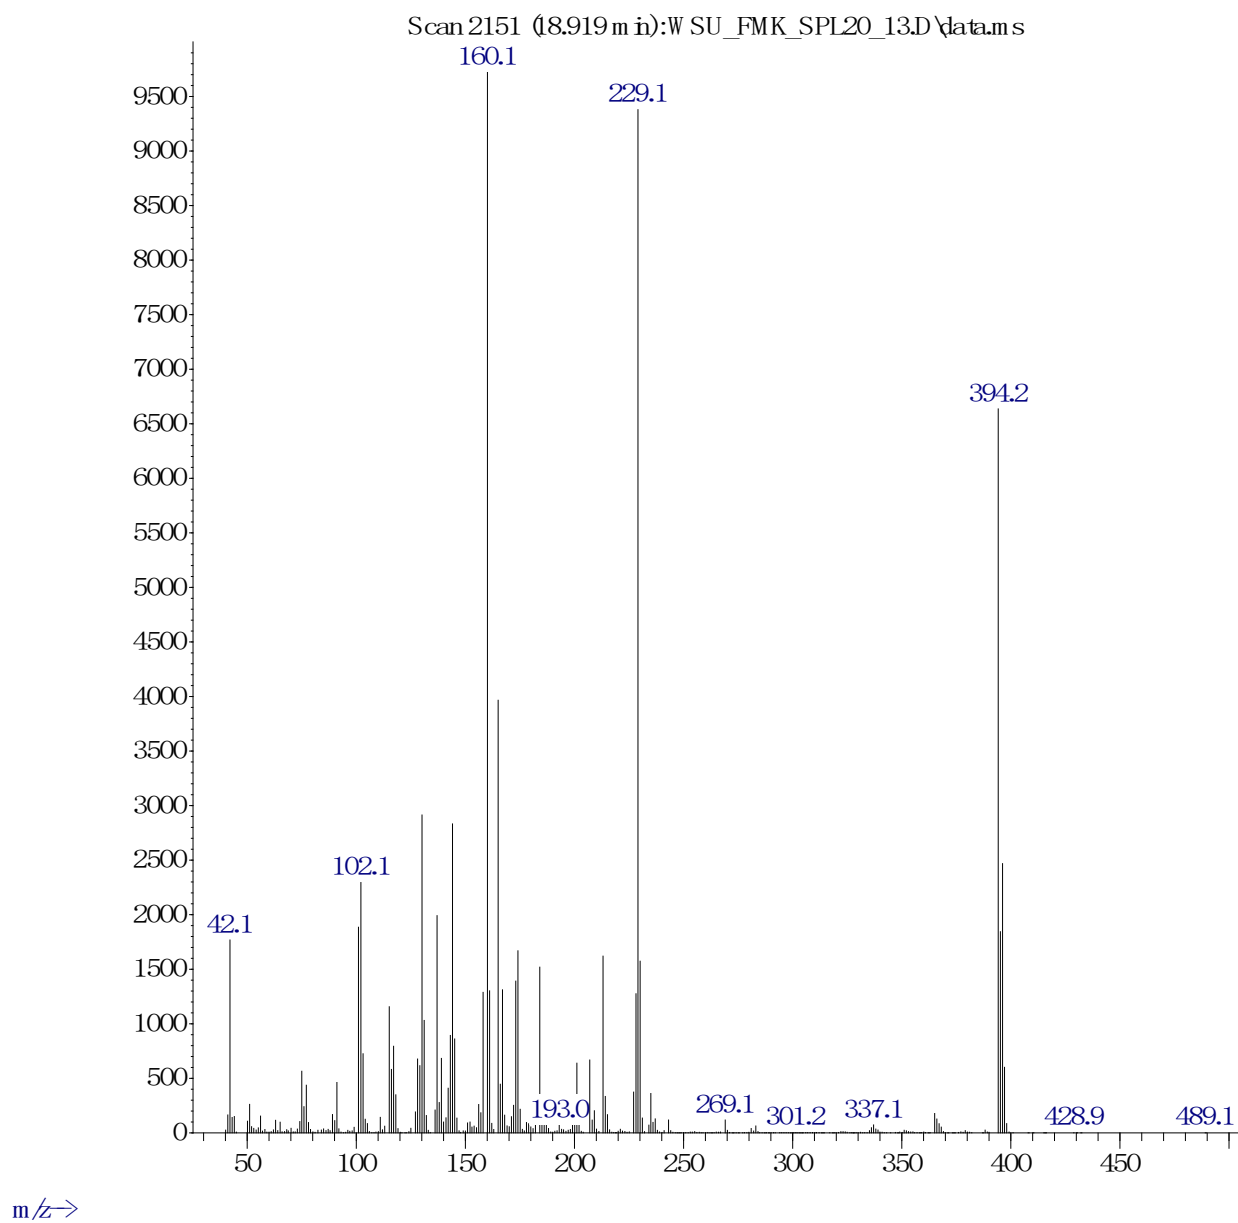Mass spectrum (m/z) of **35**.

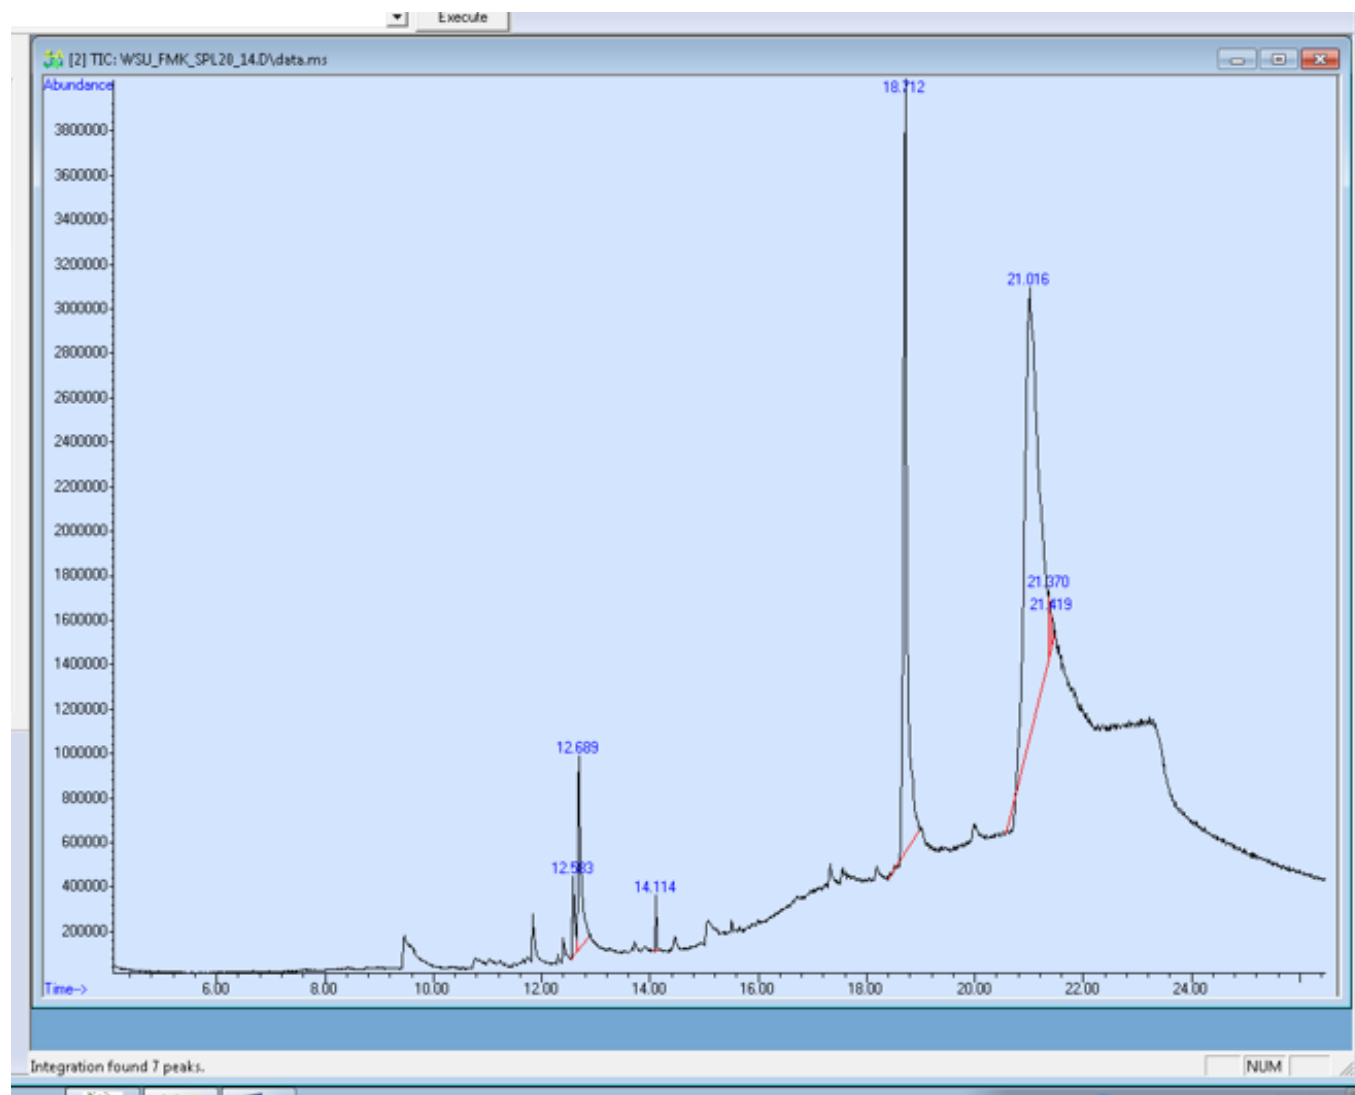Chromatogram of **36**.

Abundance

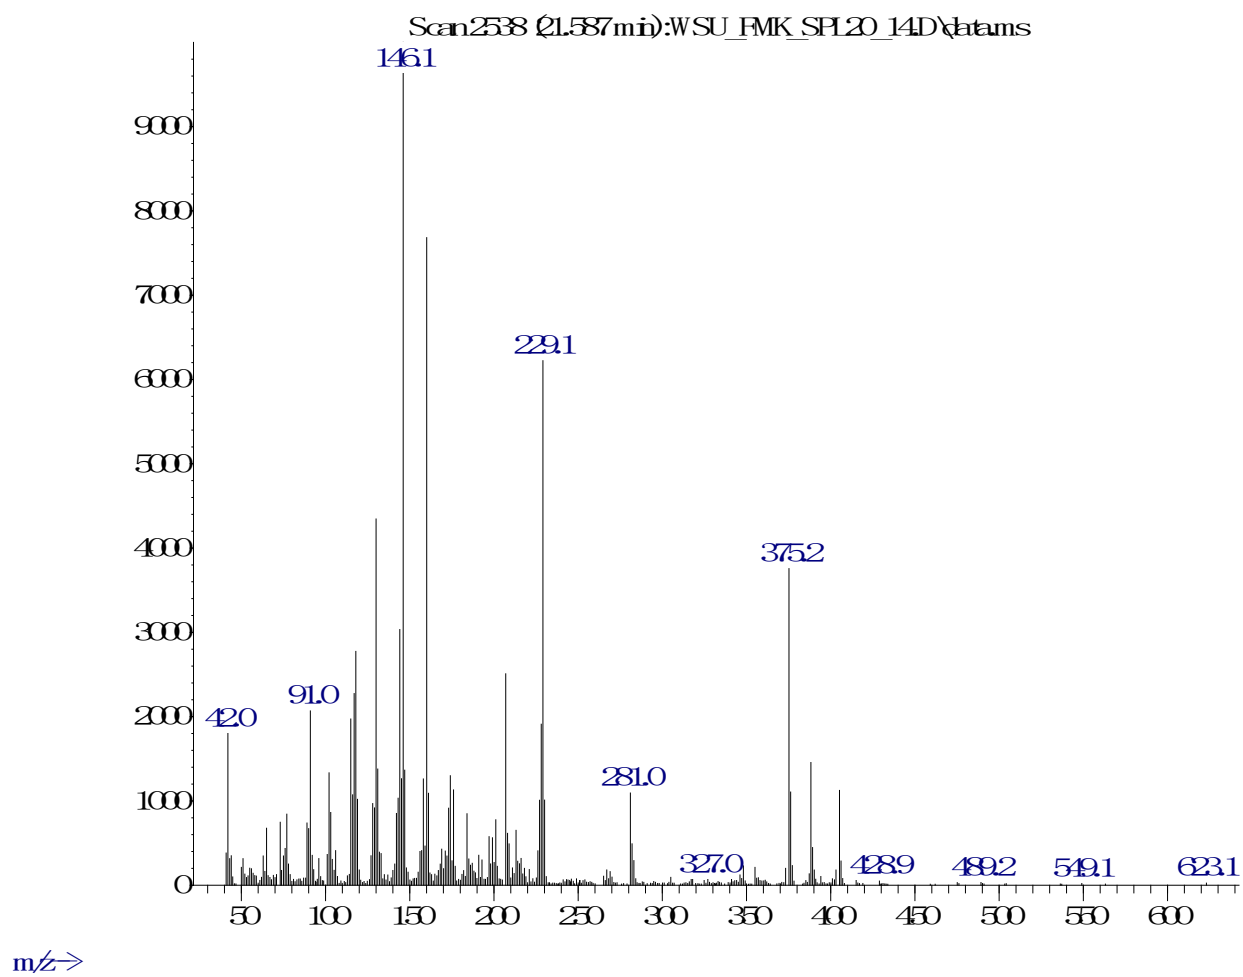

Mass spectrum (m/z) of 36.

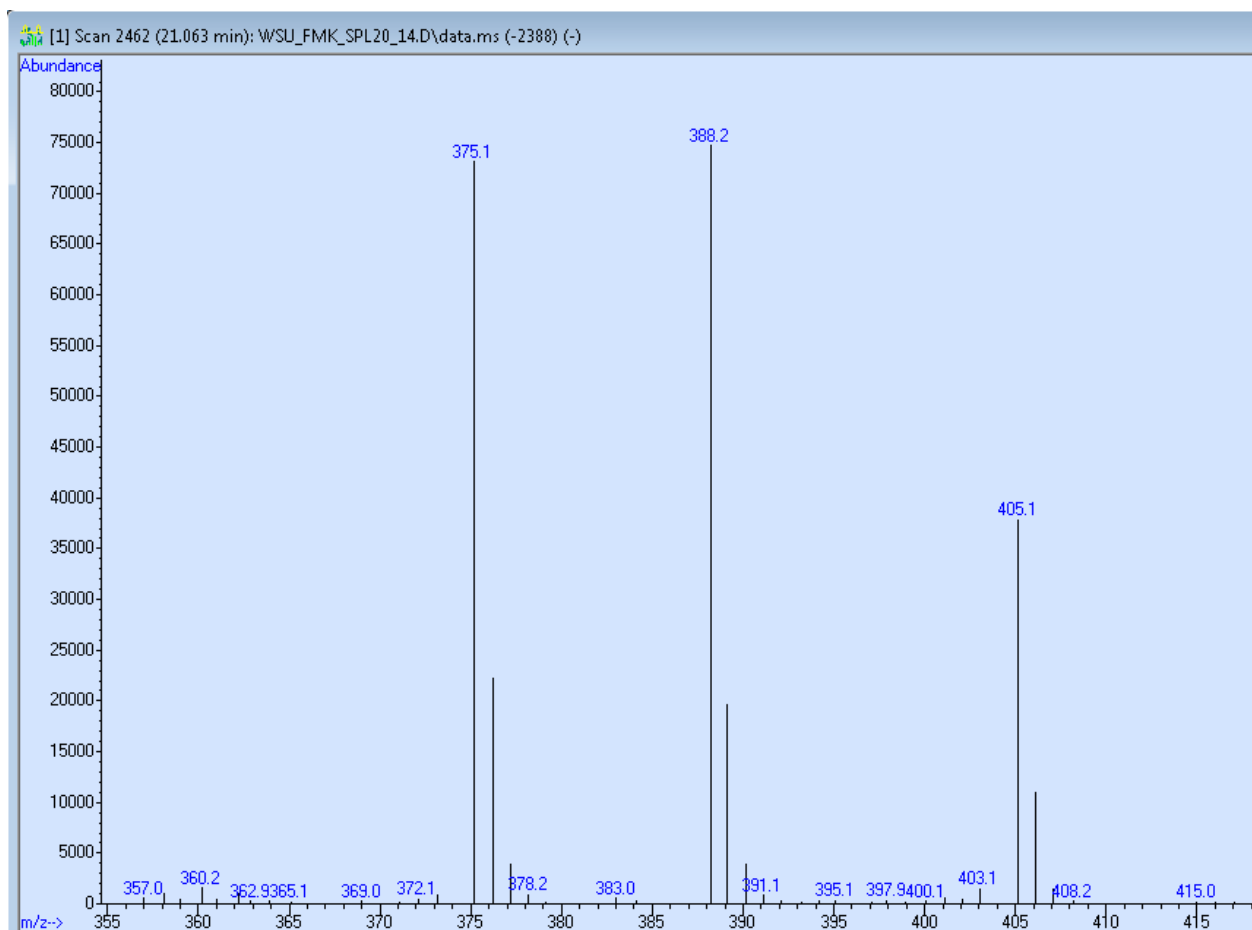

Mass spectrum (m/z) of **36**.



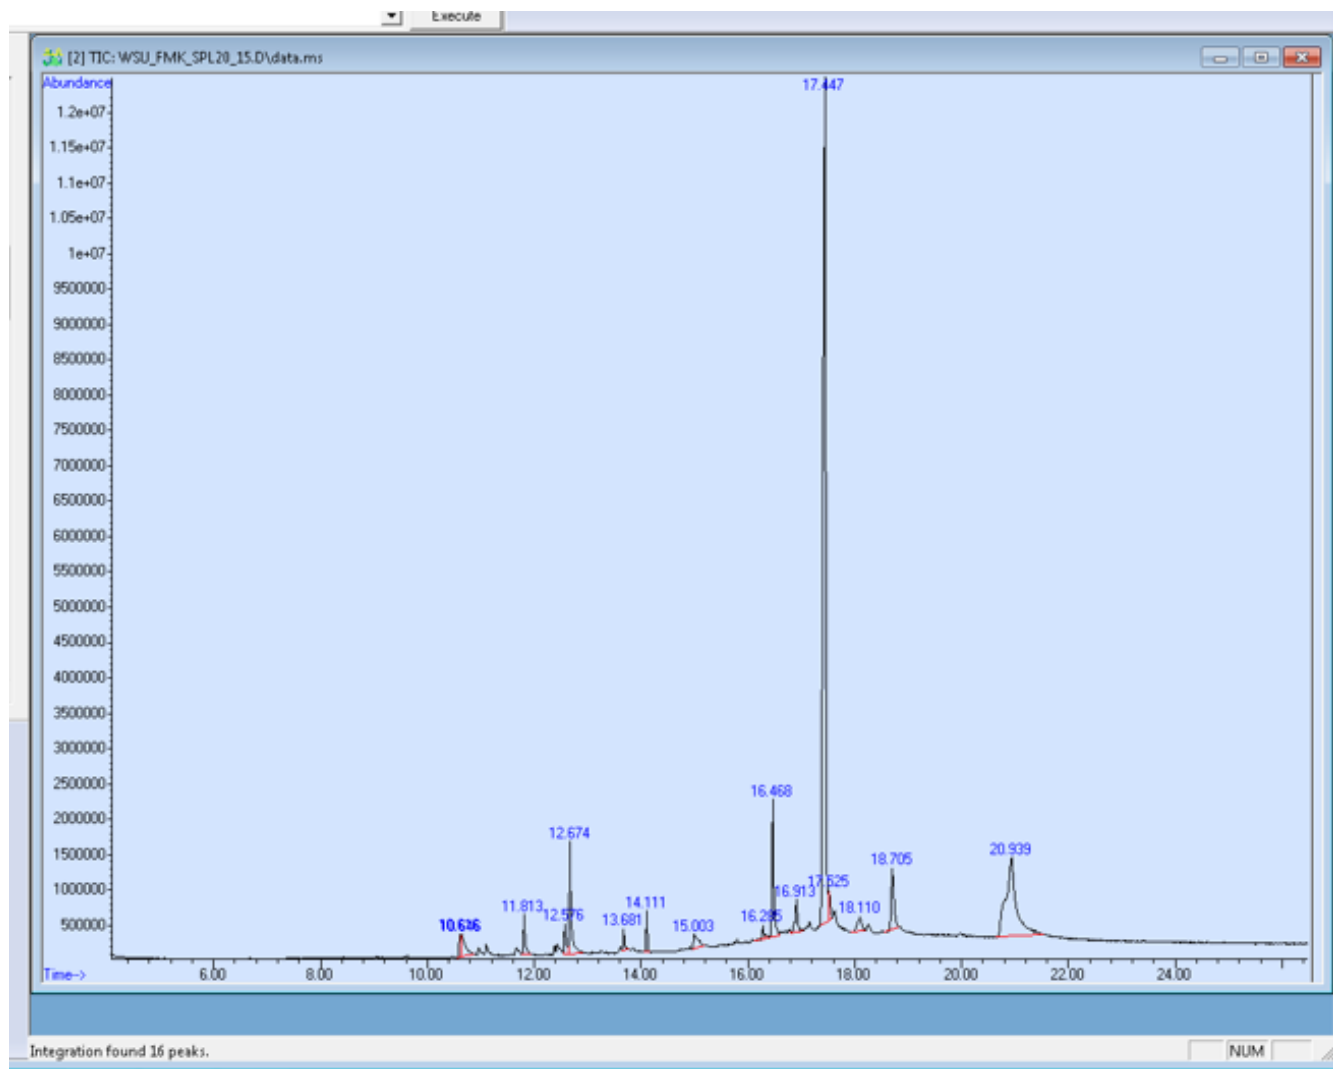Chromatograph of **37**.

Abundance

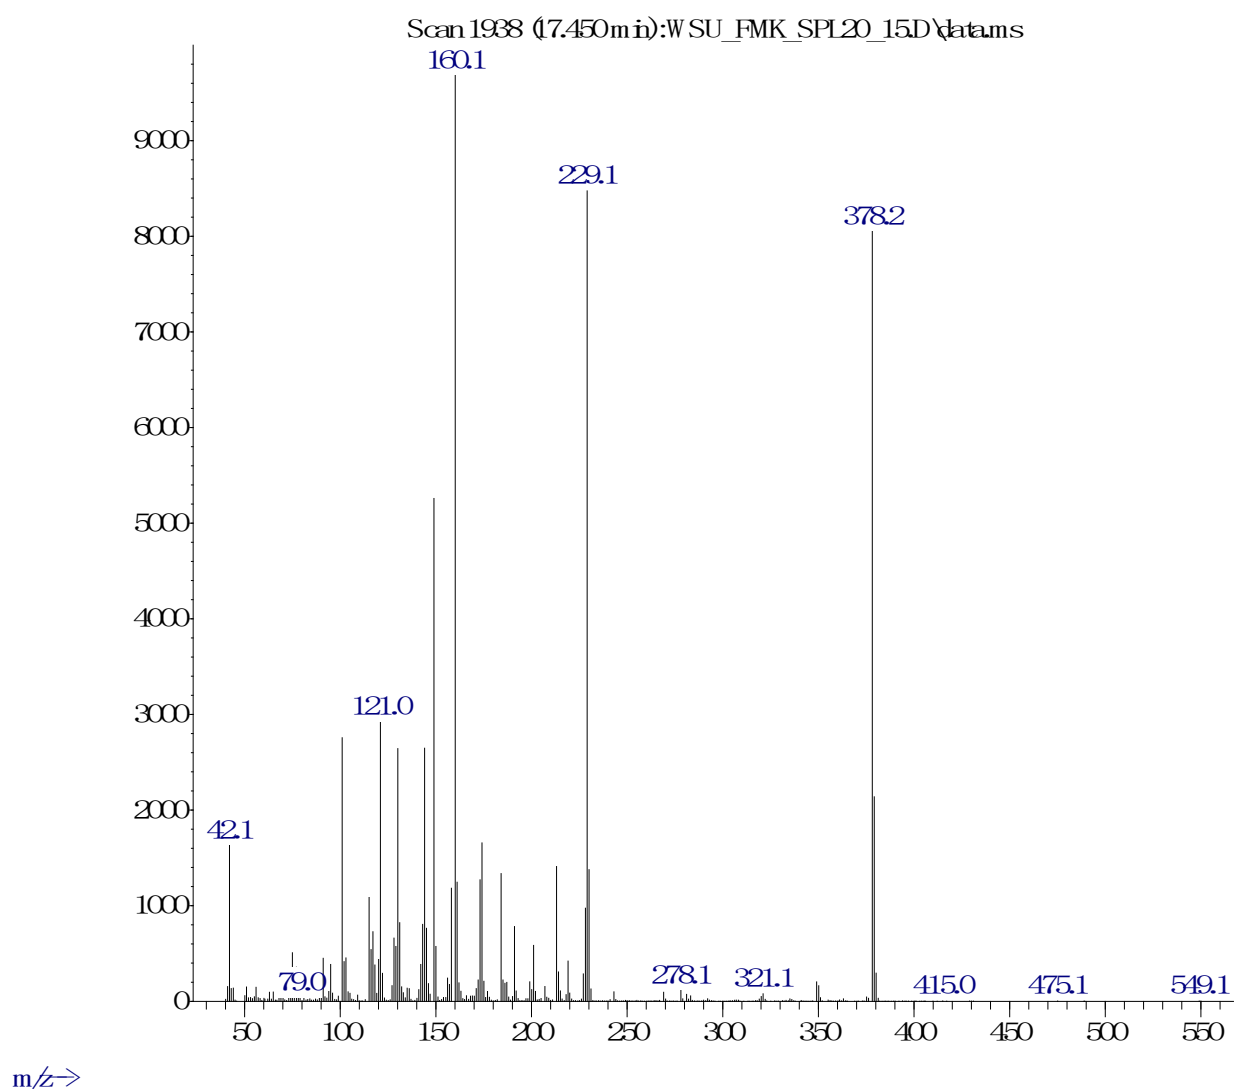Mass spectrum (m/z) of **37**.

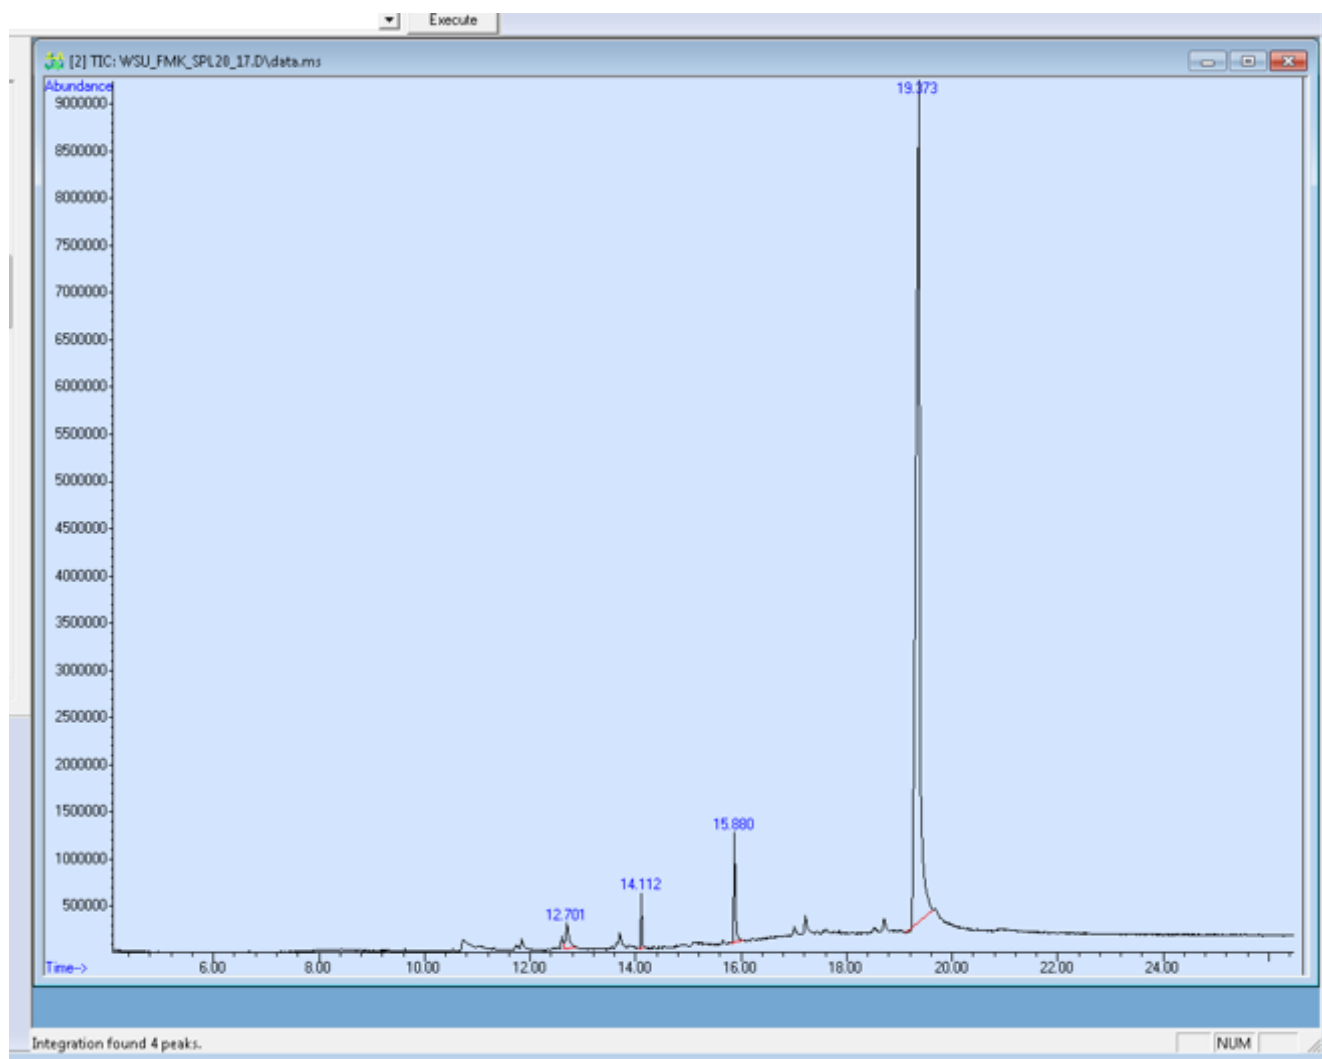Chromatogram of **38**.

Abundance

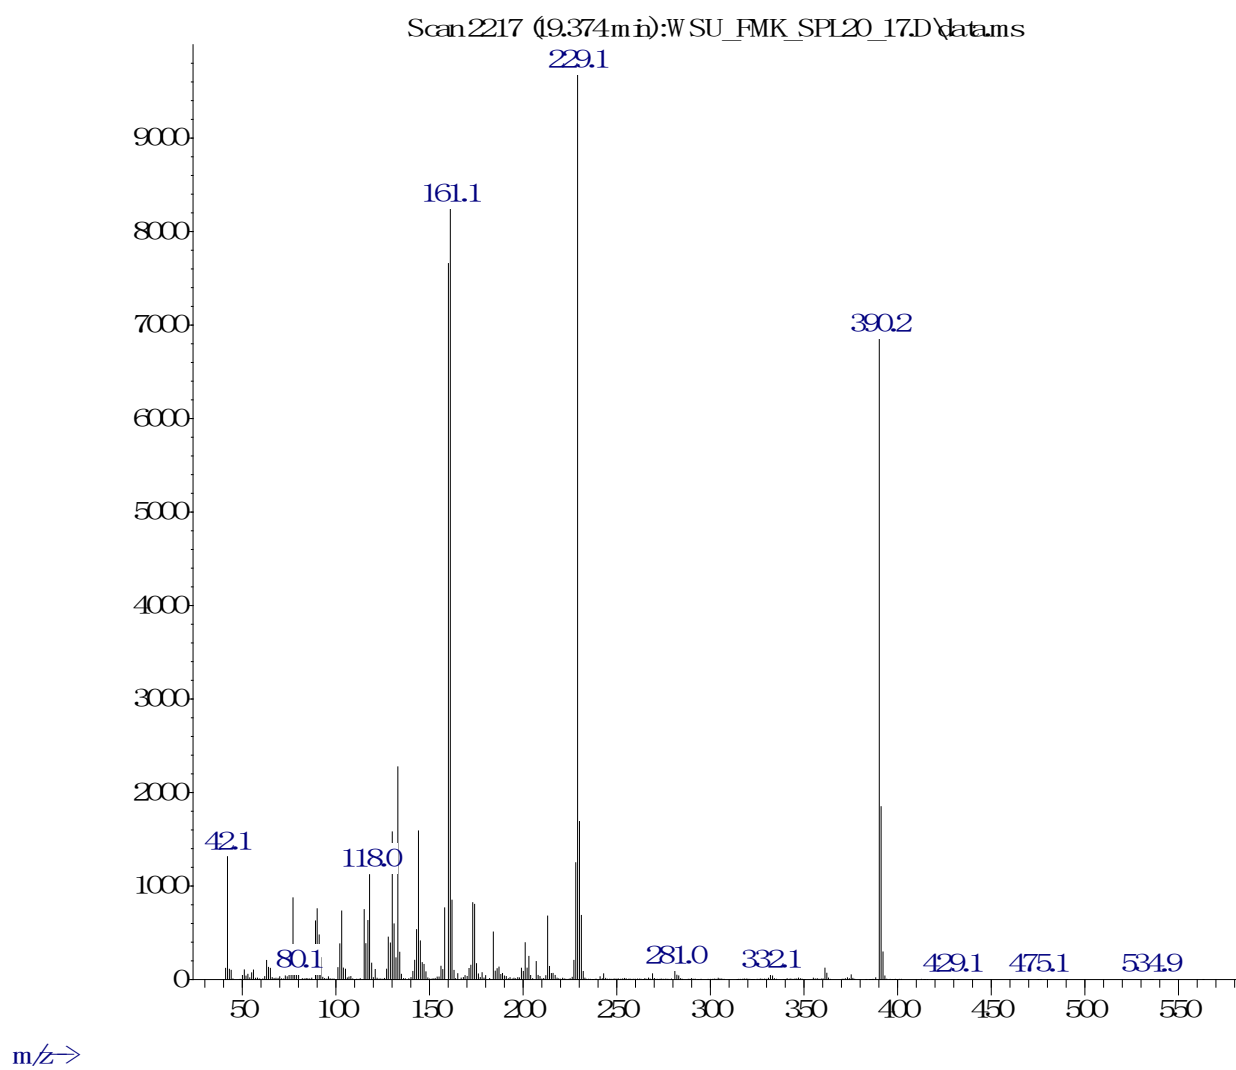Mass spectrum (m/z) of **38**.

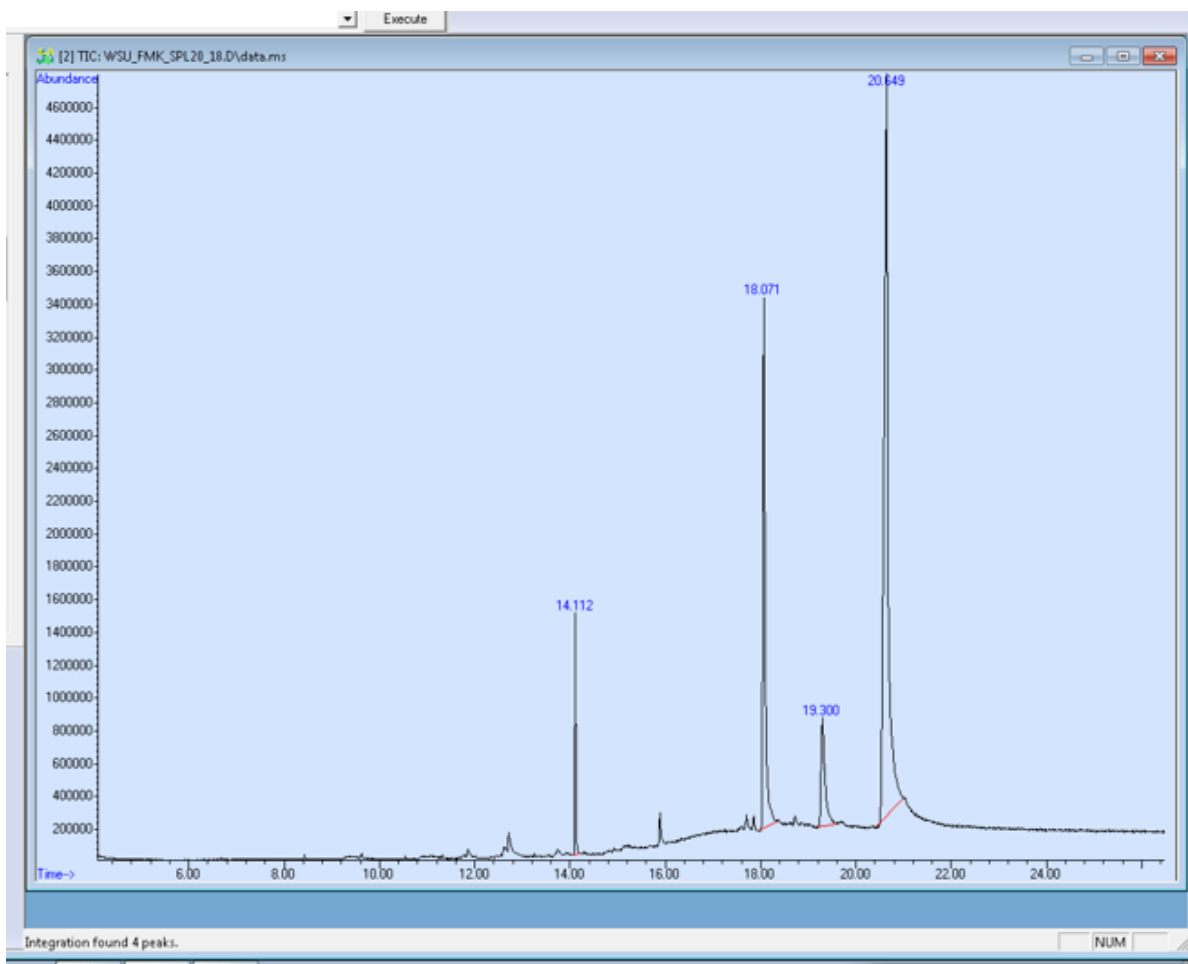Chromatogram of **39**.

Abundance

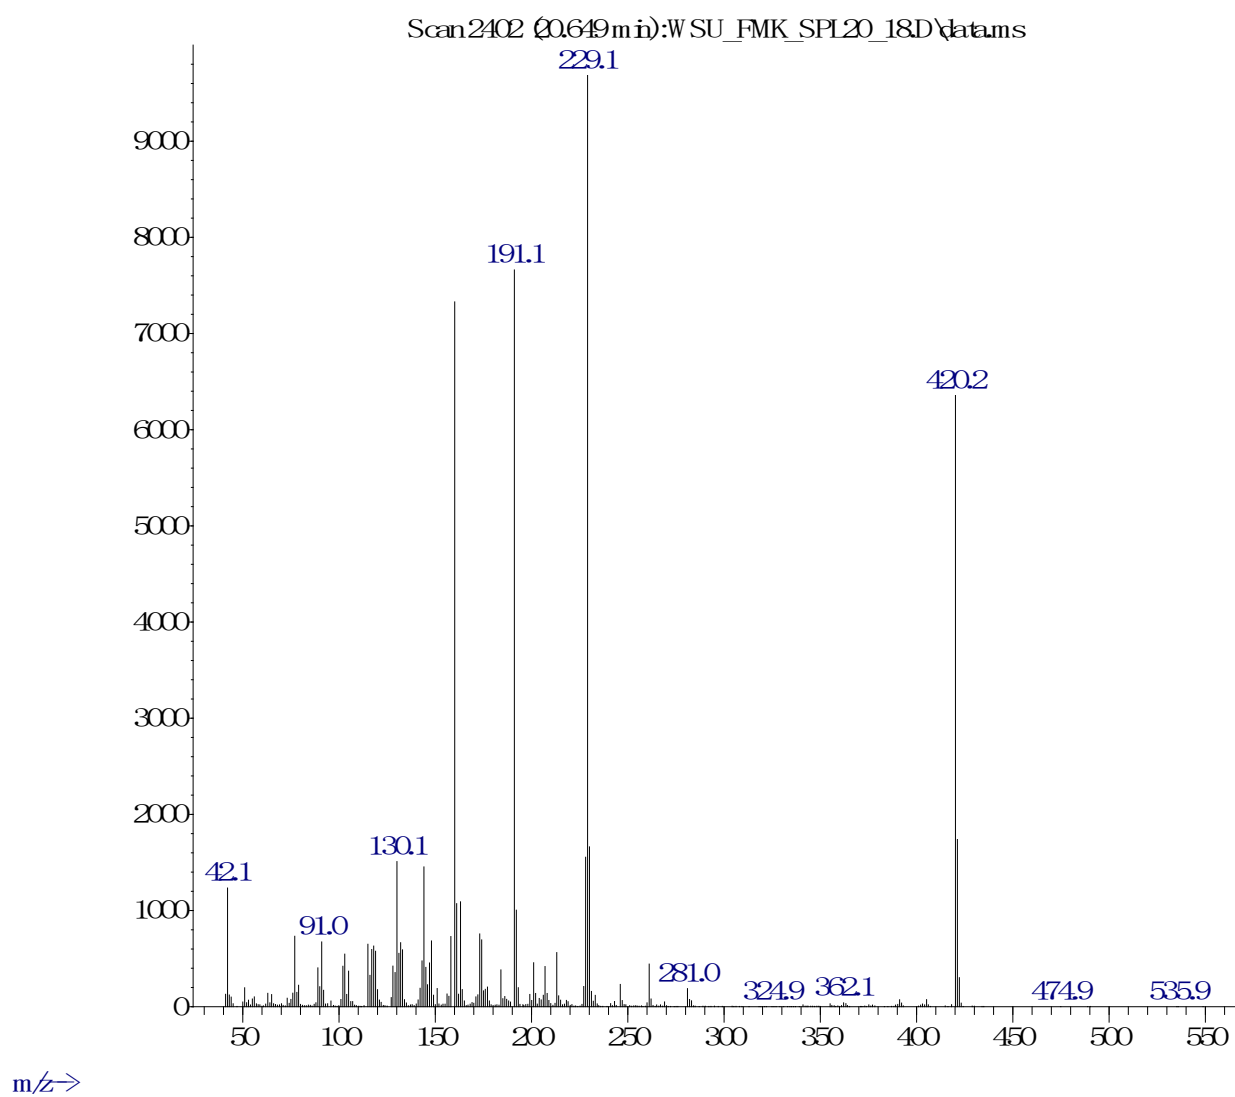

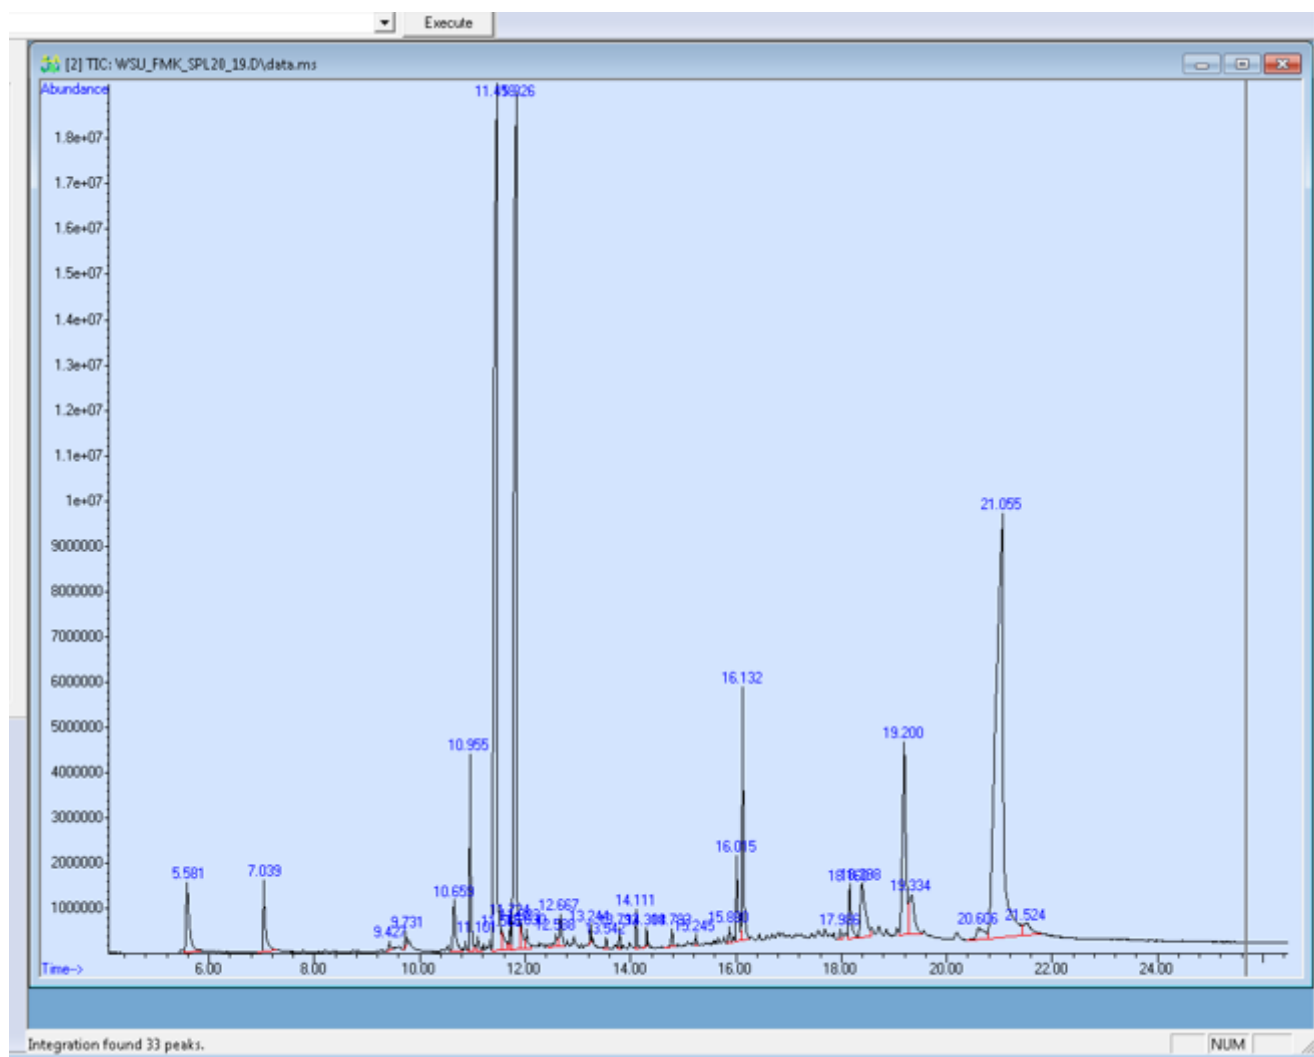

Chromatogram of 40.

Abundance

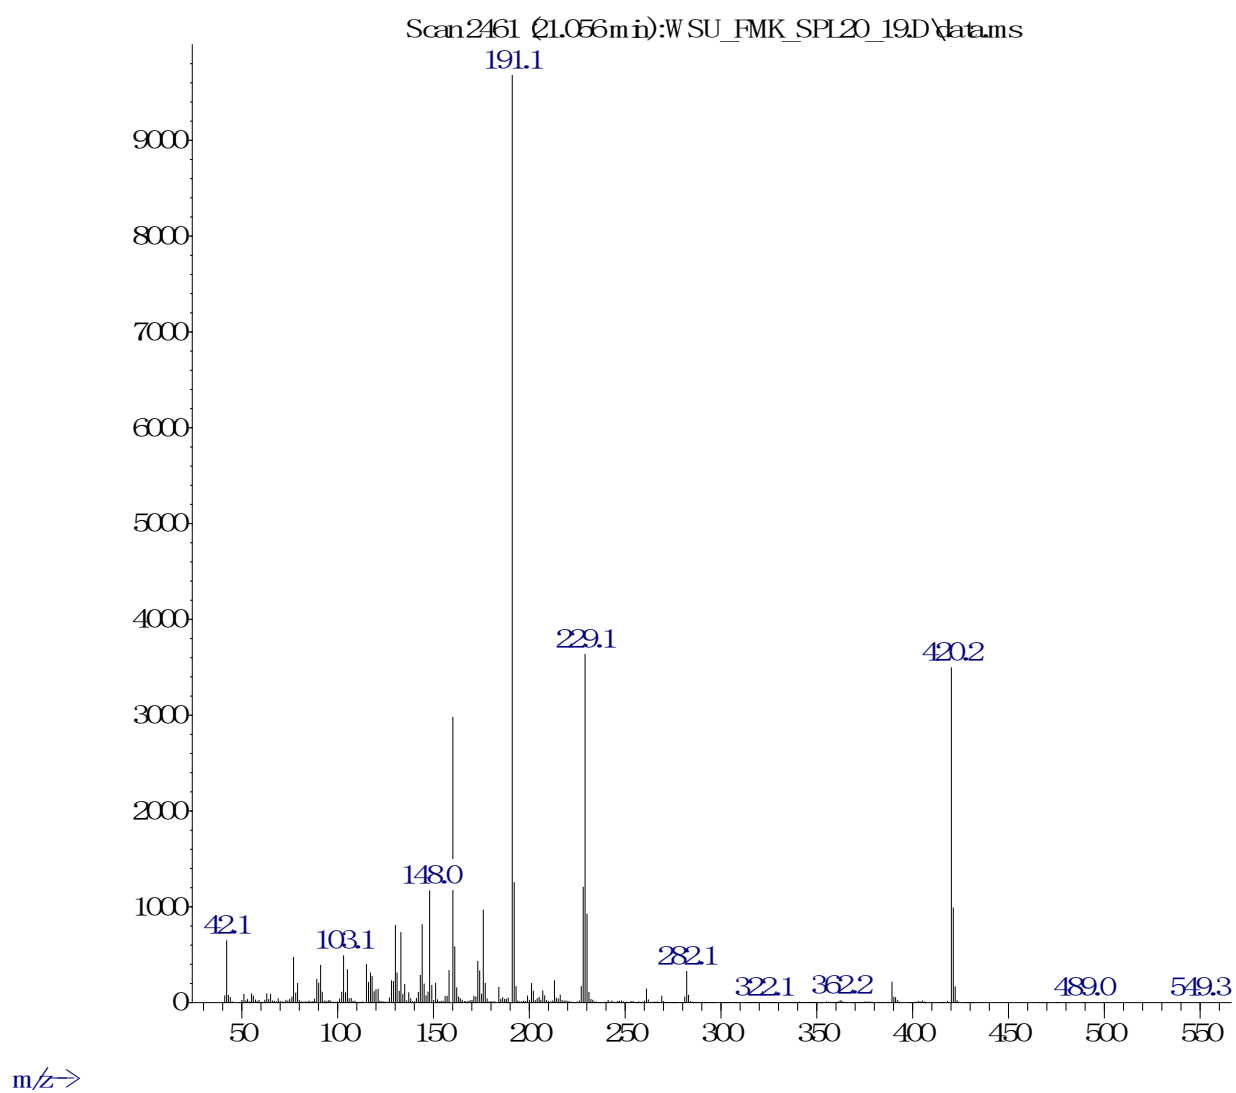

Mass spectrum (m/z) of 40.
